# Supplementary material for: CCC-NHC Au(iii) pincer complexes as a reliable platform for isolating elusive species
Source: Royal Society of Chemistry journal article supplement (doi:10.1039/d4sc02999b), 2024-01-01
Supplement: d4sc02999b2.pdf [file d4sc02999b2.pdf]

## SUPPORTING INFORMATION

### CCC–NHC Au(III) Pincer Complexes as a Reliable Platform for Isolating Elusive Species

Hugo Valdés,<sup>1,\*</sup> Nora Alpuente,<sup>1</sup> Pedro Salvador,<sup>1</sup> A. Stephen K. Hashmi,<sup>2,3\*</sup> Xavi Ribas<sup>1,\*</sup>

#### Table of Contents

|                                                                                |           |
|--------------------------------------------------------------------------------|-----------|
| <b>1 GENERAL CONSIDERATIONS .....</b>                                          | <b>3</b>  |
| <b>2 SYNTHESIS OF DIAZONIUM–BIS(AZOLIUM) SALTS.....</b>                        | <b>4</b>  |
| 2.1 SYNTHESIS OF 1,3–BIS(BROMOMETHYL)–2–NITROBENZENE (2) .....                 | 4         |
| 2.2 SYNTHESIS OF 3A AND 3B .....                                               | 4         |
| 2.3 SYNTHESIS OF 4A AND 4B .....                                               | 5         |
| 2.4 SYNTHESIS OF 5A AND 5B .....                                               | 6         |
| <b>3 SYNTHESIS OF AU(III) COMPLEXES .....</b>                                  | <b>8</b>  |
| 3.1 SYNTHESIS OF COMPLEXES 6A AND 6B.....                                      | 8         |
| 3.2 IDENTIFICATION OF COMPLEX 7B–AU.....                                       | 9         |
| 3.3 SYNTHESIS OF COMPLEXES 8A AND 8B.....                                      | 10        |
| 3.4 SYNTHESIS OF COMPLEXES 9A AND 9B.....                                      | 11        |
| 3.5 SYNTHESIS OF COMPLEX 10A .....                                             | 13        |
| 3.6 SYNTHESIS OF COMPLEX 11A .....                                             | 14        |
| 3.7 SYNTHESIS OF COMPLEX 12A .....                                             | 15        |
| <b>4 REACTION MECHANISM OF THE SYNTHESIS OF AU(III) PINCER COMPLEXES .....</b> | <b>16</b> |
| <b>5 REACTIVITY EXPERIMENTS OF AU(III) COMPLEXES .....</b>                     | <b>17</b> |
| 5.1 THERMAL STABILITY OF COMPLEX 11A.....                                      | 17        |
| 5.2 REACTIVITY OF AU(III) PINCER COMPLEXES TOWARDS FORMIC ACID (HCOOH) .....   | 17        |
| 5.3 REACTIVITY OF 12A TOWARDS TRIFLIC ACID.....                                | 22        |
| 5.4 REACTIVITY OF AU(III) PINCER COMPLEXES TOWARDS SODIUM HYDRIDE (NAH).....   | 22        |
| <b>6 CATALYTIC STUDIES OF CCC–NHC AU(III) PINCER COMPLEX 6A .....</b>          | <b>24</b> |
| <b>7 NMR SPECTRA .....</b>                                                     | <b>25</b> |
| 7.1 NMR SPECTRA OF COMPOUND 2 .....                                            | 25        |

|                                                                                |                   |
|--------------------------------------------------------------------------------|-------------------|
| 7.2 NMR SPECTRA OF COMPOUND 3A .....                                           | 28                |
| 7.3 NMR SPECTRA OF COMPOUND 3B .....                                           | 31                |
| 7.4 NMR SPECTRA OF COMPOUND 4A .....                                           | 34                |
| 7.5 NMR SPECTRA OF COMPOUND 4B .....                                           | 37                |
| 7.6 NMR SPECTRA OF COMPOUND 5A .....                                           | 40                |
| 7.7 NMR SPECTRA OF COMPOUND 5B .....                                           | 43                |
| 7.8 NMR SPECTRA OF COMPLEX 6A .....                                            | 43                |
| 7.9 NMR SPECTRA OF COMPLEX 6B .....                                            | 46                |
| 7.10 NMR SPECTRA OF COMPLEX 8A .....                                           | 49                |
| 7.11 NMR SPECTRA OF COMPLEX 8B .....                                           | 52                |
| 7.12 NMR SPECTRA OF COMPLEX 9A .....                                           | 55                |
| 7.13 NMR SPECTRA OF COMPLEX 9B .....                                           | 58                |
| 7.14 NMR SPECTRA OF COMPLEX 10A .....                                          | 61                |
| 7.15 NMR SPECTRA OF COMPLEX 10B .....                                          | 64                |
| 7.16 NMR SPECTRA OF COMPLEX 11A .....                                          | 67                |
| 7.17 NMR SPECTRA OF COMPLEX 12A .....                                          | 70                |
| 7.18 NMR SPECTRA OF COMPLEX 13A .....                                          | 73                |
| <b><u>8 X-RAY STRUCTURES AND CRYSTALLOGRAPHIC DATA .....</u></b>               | <b><u>76</u></b>  |
| 8.1 COMPOUND 5B .....                                                          | 76                |
| 8.2 COMPOUND 6A .....                                                          | 78                |
| 8.3 COMPLEX 6B .....                                                           | 80                |
| 8.4 COMPLEX 8A .....                                                           | 82                |
| 8.5 COMPLEX 8B .....                                                           | 84                |
| 8.6 COMPLEX 9A .....                                                           | 86                |
| 8.7 COMPLEX 9B .....                                                           | 88                |
| 8.8 COMPLEX 10A .....                                                          | 90                |
| 8.9 COMPLEX 11A .....                                                          | 92                |
| 8.10 COMPLEX 12A .....                                                         | 94                |
| 8.11 COMPLEX 13A .....                                                         | 96                |
| <b><u>9 EFFECTIVE FRAGMENT ORBITALS (EFOS) OF THE PINCER LIGANDS .....</u></b> | <b><u>98</u></b>  |
| <b><u>10 REFERENCES .....</u></b>                                              | <b><u>101</u></b> |

## 1 General Considerations

Experimental details: All reagents and solvents were purchased from Sigma Aldrich, Fischer Scientific, TCI, Fluorochem or Honeywall and were used without further purification. Compounds 1-isopropyl-1H-benzo[d]imidazole and 1-butyl-1H-benzo[d]imidazole were synthesized following established procedures outlined in the literature.<sup>1, 2</sup> NMR spectra were recorded on Bruker spectrometers operating at 400 MHz (<sup>1</sup>H NMR), 101 MHz (<sup>13</sup>C{<sup>1</sup>H} NMR), 376 MHz (<sup>19</sup>F NMR) and referenced to residual solvent, ( $\delta$  in ppm and  $J$  in hertz). ESI mass spectra were recorded on a Bruker Esquire 6000 Ion Trap (MS) at Serveis Tècnics de Recerca, University of Girona. For reactions carried out under inert atmosphere, a N<sub>2</sub> drybox with O<sub>2</sub> and H<sub>2</sub>O concentrations <1 ppm was employed.

Computational details: All DFT calculations were carried out using GAUSSIAN16 program.<sup>3</sup> Geometry optimizations were performed in gas-phase without any symmetry restrictions. The hybrid PBE0 functional<sup>4</sup> and Grimme's D3 dispersion corrections<sup>5</sup> with Becke-Johnson damping<sup>6, 7</sup> were used based on previous studies of Au(III) complexes.<sup>8-10</sup> Au atoms were always described with a triple-zeta Stuttgart-Köln basis set including a quasi-relativistic pseudopotential.<sup>11, 12</sup> For the other atoms, the cc-pVDZ basis set was used for geometry optimization and harmonic frequency calculations. Additional single-point calculations at the equilibrium geometries ( $E_{solv,sp}$ ) were carried out using the cc-pVTZ basis set and implicit solvent effects (*via* the Self-Consistent Reaction Field –SCRF–method using the SMD solvation model).<sup>13</sup> Only in the case of Bezuidenhout's complexes, the C and H atoms of the isopropyl and isobutyl groups were described with the cc-pVDZ basis set.

The total Gibbs Energy values ( $G$ ) were calculated using the following equation:

$$G = E_{solv,sp} + G_{corr.} + \Delta G^{\circ/*}$$

The Gibbs Energy correction ( $G_{corr.}$ ) were obtained from the thermodynamical analysis at 333.15 K, using Grimme's Quasi-Harmonic Approximation<sup>14</sup> for harmonic frequencies below 100 cm<sup>-1</sup>. The additional term  $\Delta G^{\circ/*}$  accounts for the correction to 1M standard state. These corrections were obtained with the GoodVibes code.<sup>15</sup>

The two reactions considered in this work are

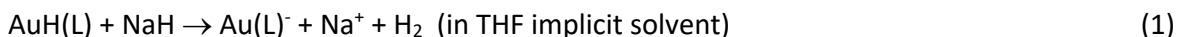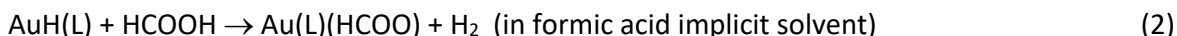

where L represents the pincer ligand.

The effective fragment orbitals (EFOs) for Au, H and pincer ligands were obtained using Natural Atomic Orbitals (NAO) partitioning<sup>16</sup> with the APOST-3D code.<sup>17</sup>

The Cartesian coordinates of all optimized structures can be found in a separate document uploaded (Aupincer.xyz file).

## 2 Synthesis of diazonium–bis(azolium) salts

### 2.1 Synthesis of 1,3–bis(bromomethyl)–2–nitrobenzene (2)

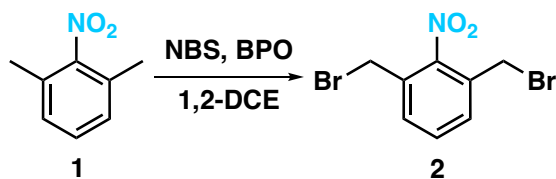

Scheme S1. Synthesis of **2**

1,3–dimethyl–2–nitrobenzene (4.4 mL, 32.4 mmol) was dissolved in 1,2–dichloroethane (30 mL), followed by the addition of *N*–bromosuccinimide (11.6 g, 65.2 mmol) and Luperox<sup>®</sup> A70S (benzoyl peroxide, 2.0g, 5.8 mmol). The resulting solution underwent reflux for 24h. Subsequently, the solution was cooled to room temperature, and washed with water (50 mL x 3). Then, Na<sub>2</sub>SO<sub>4</sub> was added to the organic phase. The solution was filtered, and the volatiles were removed until the obtention of a red–brown oil. Cyclohexane (50 mL) was added to the oil and heated to reflux for 2 minutes, followed by hot filtration. Upon cooling to room temperature, a semicrystalline compound formed in the solution. The product was collected through filtration, washed with a minimal amount of cyclohexane, and dried under high vacuum. The first crystallization affords a yellowish solid, which can be used in the next step reaction. An extra crystallization from cyclohexane affords a white–off solid. Yield: 1.5g (14%).

<sup>1</sup>H NMR (400 MHz, CDCl<sub>3</sub>) δ 7.58 – 7.44 (m, 3H, CH<sub>Ar</sub>), 4.50 (s, 4H, CH<sub>2</sub>).

<sup>13</sup>C{<sup>1</sup>H} NMR (101 MHz, CDCl<sub>3</sub>) δ 149.5 (C–NO<sub>2</sub>), 132.0 (CH<sub>Ar</sub>), 131.6 (C<sub>Ar</sub>), 131.0 (CH<sub>Ar</sub>), 26.6 (CH<sub>2</sub>Br).

ESI<sup>+</sup> (m/z): 309.88 [M+H]<sup>+</sup>

### 2.2 Synthesis of 3a and 3b

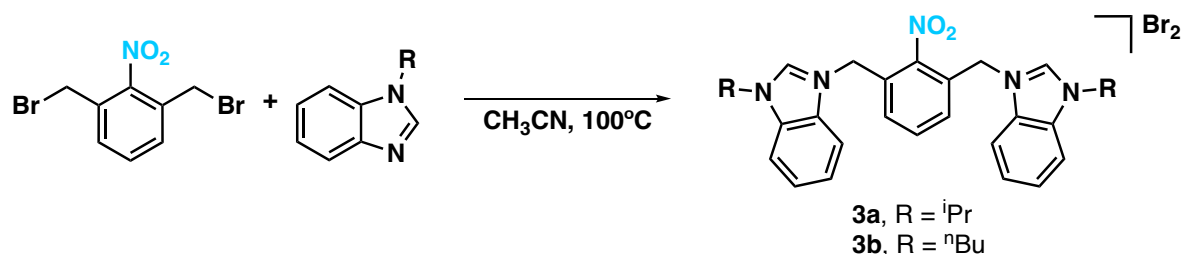

Scheme S2. Synthesis of **3a** and **3b**

A sealed vial with a solution of 1,3–bis(bromomethyl)–2–nitrobenzene (**2**, 1 equivalent) and 1–*substituted*–1H–benzo[*d*]imidazole (2.7 equivalent) in CH<sub>3</sub>CN (0.8 mL) was heated at

110 °C for 18h. Then, the solution was warm to room temperature, and filtered. The solid was washed three times with CH<sub>3</sub>CN (3mL), followed by diethyl ether (10 mL). The desired compound was obtained as a white solid.

**Compound 3a.** For the synthesis of **3a** was employed 1,3-bis(bromomethyl)-2-nitrobenzene (1.8315 g, 5.9 mmol) and 1-isopropyl-1*H*-benzo[*d*]imidazole (2.5641 g, 16.0 mmol). Yield: 2.6831g (72%).

<sup>1</sup>H NMR (400 MHz, DMSO-*d*<sub>6</sub>) δ 10.08 (s, 2H, NCHN), 8.21 (d, *J* = 8.3 Hz, 2H, CH<sub>BIm</sub>), 7.78 (d, *J* = 8.2 Hz, 2H, CH<sub>BIm</sub>), 7.71 (td, *J* = 7.9, 1.2 Hz, 2H, CH<sub>BIm</sub>), 7.67 – 7.55 (m, 3H, 3H CH<sub>BIm</sub> and 1H CH<sub>Ar</sub>), 7.31 (d, *J* = 7.9 Hz, 2H, 2H CH<sub>Ar</sub>), 6.03 (s, 4H, NCH<sub>2</sub>), 5.14 (hept, *J* = 6.6 Hz, 2H, CH<sub>iPr</sub>), 1.67 (d, *J* = 6.6 Hz, 12H, CH<sub>3iPr</sub>).

<sup>13</sup>C{<sup>1</sup>H} NMR (101 MHz, DMSO-*d*<sub>6</sub>) δ 147.1 (C-NO<sub>2</sub>), 142.2 (NCHN), 133.0 (CH<sub>Ar</sub>), 131.2 (C<sub>BIm</sub>), 130.7 (C<sub>BIm</sub>), 129.6 (CH<sub>Ar</sub>), 128.5 (C<sub>Ar</sub>), 126.9 (CH<sub>BIm</sub>), 126.8 (CH<sub>BIm</sub>), 114.4 (CH<sub>BIm</sub>), 113.8 (CH<sub>BIm</sub>), 51.0 (CH<sub>iPr</sub>), 46.9 (CH<sub>2</sub>), 21.5 (CH<sub>3iPr</sub>).

Electrospray MS (*m/z*): 548.2 [M-BF<sub>4</sub>]<sup>+</sup>

**Compound 3b.** For the synthesis of **3b** was employed 1,3-bis(bromomethyl)-2-nitrobenzene (0.8190 g, 2.7 mmol) and 1-butyl-1*H*-benzo[*d*]imidazole (1.0227 g, 5.9 mmol). Yield: 1.7348 g (99%).

<sup>1</sup>H NMR (400 MHz, DMSO) δ 10.14 (s, 2H, (NCHN)), 8.20 (d, *J* = 7.7 Hz, 2H, CH<sub>BIm</sub>), 7.89 (d, *J* = 8.0 Hz, 2H, CH<sub>BIm</sub>), 7.76 – 7.61 (m, 5H, 4H CH<sub>BIm</sub> and 1H CH<sub>Ar</sub>), 7.51 (d, *J* = 7.5 Hz, 2H, CH<sub>Ar</sub>), 6.05 (s, 4H, NCH<sub>2</sub>), 4.60 (t, *J* = 7.2 Hz, 4H, CH<sub>2Bu</sub>), 1.92 (p, *J* = 7.6 Hz, 4H, CH<sub>2Bu</sub>), 1.36 (h, *J* = 7.3 Hz, 4H, CH<sub>2Bu</sub>), 0.92 (t, *J* = 7.4 Hz, 6H, CH<sub>3Bu</sub>).

<sup>13</sup>C{<sup>1</sup>H} NMR (101 MHz, DMSO) δ 147.7 (C-NO<sub>2</sub>), 143.2 (NCHN), 133.2 (CH<sub>Ar</sub>), 131.2 (C<sub>BIm</sub>), 131.0 (C<sub>BIm</sub>), 130.7 (CH<sub>Ar</sub>), 128.2 (C<sub>Ar</sub>), 126.9 (CH<sub>BIm</sub>), 126.8 (CH<sub>BIm</sub>), 114.1 (CH<sub>BIm</sub>), 113.8 (CH<sub>BIm</sub>), 46.9 (CH<sub>2</sub>), 46.7 (CH<sub>2Bu</sub>), 30.6 (CH<sub>2Bu</sub>), 19.0 (CH<sub>2Bu</sub>), 13.4 (CH<sub>3Bu</sub>).

Electrospray MS (*m/z*): 578.2 [M-BF<sub>4</sub>]<sup>+</sup>

### 2.3 Synthesis of 4a and 4b

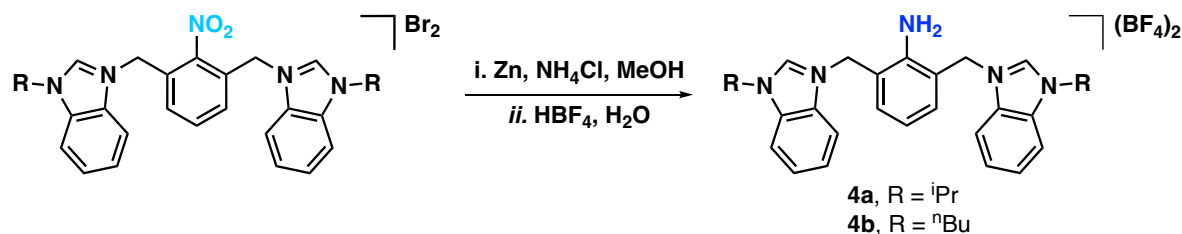

Scheme S3. Synthesis of **4a** and **4b**

A solution of **1a** or **1b** (1.6 mmol) and NH<sub>4</sub>Cl (432.9 mg, 7.9 mmol) in methanol (350 mL) was stirred at room temperature until a clear solution was observed. Then, Zn (2.0920 g, 32.0 mmol) was added in one portion, and the resulting suspension was refluxed for 30 min. The reaction was warmed to room temperature and filtered over celite<sup>®</sup>, then all the volatiles were removed under high vacuum. The solid residue was washed with chloroform (20 mL), followed by the addition of distilled water (50 mL) and HBF<sub>4</sub> (1 mL, 4wt.%). The solution was stirred for 2 h. After this time a white solid was recovered by filtration and washed three times with water (10 mL), followed by 10 mL of diethylether:methanol (8:2) solution.

For the synthesis of **4a** was employed 3,3'-((2-nitro-1,3-phenylene)bis(methylene))bis(1-propyl-1*H*-benzo[*d*]imidazol-3-ium) bromide (1.021 g, 1.6 mmol). Yield: 926.5 mg (95%).

<sup>1</sup>H NMR (400 MHz, DMSO-*d*<sub>6</sub>) δ 9.74 (s, 2H, NCHN), 8.15 (d, *J* = 8.3 Hz, 2H, CH<sub>Bim</sub>), 7.80 (d, *J* = 8.2 Hz, 2H, CH<sub>Bim</sub>), 7.67 (t, *J* = 8.4 Hz, 2H, CH<sub>Bim</sub>), 7.59 (t, *J* = 7.3 Hz, 2H, CH<sub>Bim</sub>), 7.23 (d, *J* = 7.6 Hz, 2H, CH<sub>Ar</sub>), 6.69 (t, *J* = 7.6 Hz, 1H, CH<sub>Ar</sub>), 5.66 (s, 6H, 2H -NH<sub>2</sub> and 4H CH<sub>2</sub>), 5.08 (hept, *J* = 6.7 Hz, 2H, CH<sub>iPr</sub>), 1.62 (d, *J* = 6.7 Hz, 12H, CH<sub>3 iPr</sub>).

<sup>13</sup>C{<sup>1</sup>H} NMR (101 MHz, DMSO-*d*<sub>6</sub>) δ = 144.9 (C-NH<sub>2</sub>), 140.7 (NCHN), 131.3 (C<sub>Bim</sub>), 131.2 (CH<sub>Ar</sub>), 130.7 (C<sub>Bim</sub>), 126.6 (CH<sub>Bim</sub>), 117.7 (C<sub>Ar</sub>), 117.1 (CH<sub>Ar</sub>), 114.2 (CH<sub>Bim</sub>), 114.0 (CH<sub>Bim</sub>), 50.7 (CH<sub>iPr</sub>), 47.4 (CH<sub>2</sub>), 21.5 (CH<sub>3 iPr</sub>).

Electrospray MS (*m/z*):526.4 [M-BF<sub>4</sub>]<sup>+</sup>

For the synthesis of **4b** was employed 3,3'-((2-nitro-1,3-phenylene)bis(methylene))bis(1-butyl-1*H*-benzo[*d*]imidazol-3-ium) bromide (1.052 g, 1.6 mmol). Yield: 1.019 g (99%).

<sup>1</sup>H NMR (400 MHz, DMSO-*d*<sub>6</sub>) δ 9.50 (s, 2H, NCHN), 8.12 (d, *J* = 7.8 Hz, 2H, CH<sub>Bim</sub>), 7.94 (d, *J* = 7.5 Hz, 2H, CH<sub>Bim</sub>), 7.75 – 7.61 (m, 4H, CH<sub>Bim</sub>), 7.32 (d, *J* = 7.6 Hz, 2H, CH<sub>Ar</sub>), 6.75 (t, *J* = 7.6 Hz, 1H, CH<sub>Ar</sub>), 5.65 (br s, 6H, 2H NH<sub>2</sub> and 4H CH<sub>2</sub>), 4.50 (t, *J* = 7.2 Hz, 4H, CH<sub>2Bu</sub>), 1.85 (p, *J* = 7.4 Hz, 4H, CH<sub>2Bu</sub>), 1.32 (h, *J* = 7.4 Hz, 4H, CH<sub>2Bu</sub>), 0.90 (t, *J* = 7.3 Hz, 6H, CH<sub>3Bu</sub>).

<sup>13</sup>C{<sup>1</sup>H} NMR (101 MHz, DMSO-*d*<sub>6</sub>) δ 145.7 (C<sub>Ar</sub>-NH<sub>2</sub>), 141.6 (NCHN), 132.5 (CH<sub>Ar</sub>), 131.4 (C<sub>Bim</sub>), 131.3 (C<sub>Bim</sub>), 126.7 (CH<sub>Bim</sub>), 126.5 (CH<sub>Bim</sub>), 117.0 (C<sub>Ar</sub>), 116.9 (CH<sub>Ar</sub>), 114.1 (CH<sub>Bim</sub>), 113.8 (CH<sub>Bim</sub>), 47.5 (CH<sub>2</sub>), 46.4 (CH<sub>2Bu</sub>), 30.7 (CH<sub>2Bu</sub>), 19.0 (CH<sub>2Bu</sub>), 13.3 (CH<sub>3Bu</sub>).

Electrospray MS (*m/z*):554.3 [M-BF<sub>4</sub>]<sup>+</sup>

## 2.4 Synthesis of **5a** and **5b**

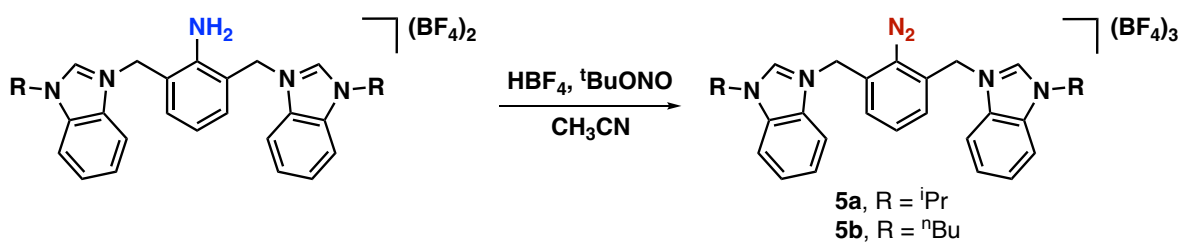

Scheme S4. Synthesis of **5a** and **5b**.

A solution of **4a** or **4b** (1.7 mmol) in CH<sub>3</sub>CN (40 mL) was cooled at 0°C, followed by the addition of HBF<sub>4</sub> (0.8 mL, 6.3 mmol). Then, <sup>t</sup>BuONO (240.4 μL, 1.8 mmol) was added, and the reaction mixture was stirred for 15 min at 0°C. After this time, diethyl ether (80 mL) was added, and the solution was kept at 0°C for 20 min. The white solid was filtered and washed with diethyl ether (3 x 10 mL).

For the synthesis of **5a** was used 3,3'-((2-amino-1,3-phenylene)bis(methylene))bis(1-<sup>i</sup>propyl-1*H*-benzo[*d*]imidazol-3-ium) tetrafluoroborate (1.032 g, 1.7 mmol). Yield: 1.1709 g (96%).

<sup>1</sup>H NMR (400 MHz, DMSO-*d*<sub>6</sub>) δ 10.05 (s, 2H, NCHN), 8.26 (d, *J* = 8.3 Hz, 2H, CH<sub>BIm</sub>), 8.07 (t, *J* = 7.9 Hz, 1H, CH<sub>Ar</sub>), 7.82 (d, *J* = 8.2 Hz, 2H, CH<sub>BIm</sub>), 7.76 (t, *J* = 7.9 Hz, 2H, CH<sub>BIm</sub>), 7.70 (t, *J* = 7.8 Hz, 2H, CH<sub>BIm</sub>), 7.62 (d, *J* = 7.9 Hz, 2H, CH<sub>Ar</sub>), 6.39 (s, 4H, CH<sub>2</sub>), 5.15 (hept, *J* = 6.6 Hz, 2H, CH<sub>iPr</sub>), 1.72 (d, *J* = 6.7 Hz, 5H, CH<sub>3iPr</sub>).

<sup>13</sup>C{<sup>1</sup>H} NMR (101 MHz, DMSO-*d*<sub>6</sub>) δ = 142.6 (NCHN), 141.2 (CH<sub>Ar</sub>), 138.9 (C<sub>Ar</sub>), 130.9 (CH<sub>BIm</sub>), 130.7 (CH<sub>BIm</sub>), 130.4 (CH<sub>Ar</sub>), 127.1 (CH<sub>BIm</sub>), 127.0 (CH<sub>BIm</sub>), 114.7 (CH<sub>BIm</sub>), 113.9 (C-N<sub>2</sub>), 113.8 (CH<sub>BIm</sub>), 51.3 (CH<sub>iPr</sub>), 46.4 (CH<sub>2</sub>), 21.4 (CH<sub>3iPr</sub>).

Electrospray MS (*m/z*):625.2 [M-BF<sub>4</sub>]<sup>+</sup>.

For the synthesis of **5b** was used 3,3'-((2-amino-1,3-phenylene)bis(methylene))bis(1-butyl-1*H*-benzo[*d*]imidazol-3-ium) tetrafluoroborate (1.090 g, 1.7 mmol). Yield: 1.158 mg (92%).

<sup>1</sup>H NMR (400 MHz, DMSO-*d*<sub>6</sub>) δ 10.00 (s, 2H, NCHN), 8.24 (d, *J* = 8.2 Hz, 2H, CH<sub>BIm</sub>), 8.09 (t, *J* = 8.0 Hz, 1H, CH<sub>Ar</sub>), 7.84 (d, *J* = 8.2 Hz, 2H, CH<sub>BIm</sub>), 7.78 (t, *J* = 7.3 Hz, 2H, CH<sub>BIm</sub>), 7.71 (t, *J* = 7.4 Hz, 2H, CH<sub>BIm</sub>), 7.62 (d, *J* = 7.9 Hz, 2H, CH<sub>Ar</sub>), 6.42 (s, 4H, CH<sub>2</sub>), 4.60 (t, *J* = 7.4 Hz, 4H, CH<sub>2Bu</sub>), 1.99 (p, *J* = 7.6 Hz, 4H, CH<sub>2Bu</sub>), 1.46 (h, *J* = 7.4 Hz, 4H, CH<sub>2Bu</sub>), 0.99 (t, *J* = 7.3 Hz, 6H, CH<sub>3Bu</sub>).

Electrospray MS (*m/z*):653.3 [M-BF<sub>4</sub>]<sup>+</sup>

We were unable to acquire the <sup>13</sup>C{<sup>1</sup>H} NMR spectra due to the compound's instability in DMSO solution.

**Note:** Compounds **5a** and **5b** exhibited instability in a DMSO-*d*<sub>6</sub> solution at room temperature. In the <sup>1</sup>H NMR spectrum, significant signals of decomposition products began to emerge after a few minutes. However, these compounds can be stored in a solid state at room temperature and under air for several months (~1 year) without apparent decomposition.

### 3 Synthesis of Au(III) complexes

#### 3.1 Synthesis of complexes **6a** and **6b**

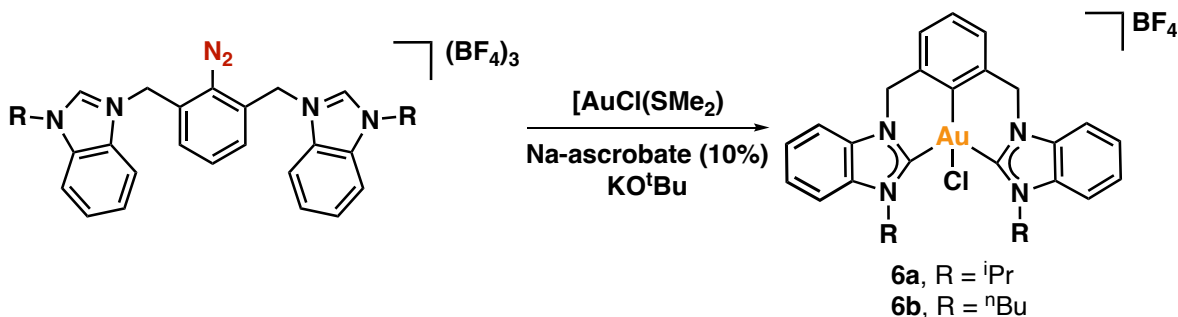

Scheme S5. Synthesis of **6a** and **6b**.

In glovebox, a solution of compound **5a** or **5b** (0.28 mmol), LiCl (35.2 mg, 0.83 mmol), and [Au(S(CH<sub>3</sub>)<sub>2</sub>)Cl] (82.8 mg, 0.28 mmol) in DMSO (0.8 mL) was stirred at room temperature for 20 min at room temperature in the absence of light. Then, a solution of sodium ascorbate (16.8 mg, 0.09 mmol) in DMSO (1 mL) was added dropwise and the mixture was stirred for 1h. During this time the color of the solution changed from yellowish to red, and the appearance of bubbles was evident. Then, a solution of KO<sup>t</sup>Bu (78.6 mg, 0.70 mmol) in DMSO (1.2 mL) was added dropwise. The reaction was removed from the glovebox and was stirred at 50 °C for at least 18h. After this time, the reaction mixture was poured into 25 mL of distilled water. The formed solid was filtered and washed with water (3 x 1 mL). The solid was dried in the funnel under vacuum, and then, was dissolved in CH<sub>2</sub>Cl<sub>2</sub> and filtered through celite®, and all volatiles were removed under vacuum. The residue was then purified using a chromatographic column of neutral aluminum oxide and eluting with CH<sub>2</sub>Cl<sub>2</sub>. If after the solid remains yellow, it can be washed with THF to produce a pure white product.

**Complex 6a.** For the synthesis of **6a** was used compound **5a** (200 mg, 0.28 mmol). Yield: 83.2 mg (40%).

<sup>1</sup>H NMR (400 MHz, CD<sub>3</sub>CN) δ 7.97 (dd, *J* = 10.3, 8.7 Hz, 4H, CH<sub>Bim</sub>), 7.65 – 7.57 (m, 2H, CH<sub>Bim</sub>), 7.57 – 7.50 (m, 2H, CH<sub>Bim</sub>), 7.45 (d, *J* = 7.4 Hz, 2H, CH<sub>Ar</sub>), 7.24 (t, *J* = 7.7 Hz, 1H, CH<sub>Ar</sub>), 5.84 (hept, *J* = 6.9 Hz, 2H, CH<sub>iPr</sub>), 5.55 (s, 4H, CH<sub>2</sub>), 1.91 (d, *J* = 7.0 Hz, 6H, CH<sub>3iPr</sub>), 1.60 (d, *J* = 7.1 Hz, 6H, CH<sub>3iPr</sub>).



$^{13}\text{C}\{^1\text{H}\}$  NMR (101 MHz,  $\text{CD}_3\text{CN}$ )  $\delta$  170.3 ( $C_{\text{carbene-Au}}$ ), 137.2 ( $C_{\text{Ar}}$ ), 134.9 ( $C_{\text{Ar-Au}}$ ), 135.6 ( $C_{\text{BIm}}$ ), 132.7 ( $C_{\text{BIm}}$ ), 129.4 ( $\text{CH}_{\text{Ar}}$ ), 129.2 ( $\text{CH}_{\text{Ar}}$ ), 126.4 ( $\text{CH}_{\text{BIm}}$ ), 126.1 ( $\text{CH}_{\text{BIm}}$ ), 116.0 ( $\text{CH}_{\text{BIm}}$ ), 113.7 ( $\text{CH}_{\text{BIm}}$ ), 55.4 ( $\text{CH}_{\text{iPr}}$ ), 53.6 ( $\text{CH}_2$ ), 22.3 ( $\text{CH}_{3\text{iPr}}$ ), 21.5 ( $\text{CH}_{3\text{iPr}}$ ).

Electrospray MS ( $m/z$ ): 653.2 [ $\text{M-BF}_4$ ] $^+$ .

**Complex 6b.** For the synthesis of **6b** was used compound **5b** (207mg, 0.28mmol). Yield: 86.4 mg (40%).

$^1\text{H}$  NMR (400 MHz,  $\text{DMSO-}d_6$ )  $\delta$  8.21 (d,  $J = 8.0$  Hz, 2H,  $\text{CH}_{\text{BIm}}$ ), 8.01 (d,  $J = 7.9$  Hz, 2H,  $\text{CH}_{\text{BIm}}$ ), 7.70 – 7.57 (m, 4H,  $\text{CH}_{\text{BIm}}$ ), 7.53 (d,  $J = 7.5$  Hz, 2H,  $\text{CH}_{\text{Ar}}$ ), 7.27 (t,  $J = 7.5$  Hz, 1H,  $\text{CH}_{\text{Ar}}$ ), 5.88 (d,  $J = 14.9$  Hz, 2H,  $\text{CH}_2$ ), 5.63 (d,  $J = 14.9$  Hz, 2H,  $\text{CH}_2$ ), 4.95 – 4.78 (m, 4H,  $\text{CH}_{2\text{Bu}}$ ), 2.00 – 1.91 (m, 4H,  $\text{CH}_{2\text{Bu}}$ ), 1.41 – 1.21 (m, 4H,  $\text{CH}_{2\text{Bu}}$ ), 0.90 (t,  $J = 7.4$  Hz, 6H,  $\text{CH}_{3\text{Bu}}$ ).

$^{13}\text{C}\{^1\text{H}\}$  NMR (101 MHz,  $\text{DMSO-}d_6$ )  $\delta$  168.8 ( $C_{\text{carbene-Au}}$ ), 136.6 ( $C_{\text{Ar}}$ ), 133.1 ( $C_{\text{BIm}}$ ), 132.4 ( $C_{\text{BIm}}$ ), 128.3 ( $\text{CH}_{\text{Ar}}$ ), 128.1 ( $\text{CH}_{\text{Ar}}$ ), 125.6 ( $\text{CH}_{\text{BIm}}$ ), 113.3 ( $\text{CH}_{\text{BIm}}$ ), 112.7 ( $\text{CH}_{\text{BIm}}$ ), 52.1 ( $\text{CH}_2$ ), 47.5 ( $\text{CH}_{2\text{Bu}}$ ), 31.7 ( $\text{CH}_{2\text{Bu}}$ ), 19.3 ( $\text{CH}_{2\text{Bu}}$ ), 13.6 ( $\text{CH}_{3\text{Bu}}$ ).

Electrospray MS ( $m/z$ ): 681.2 [ $\text{M-BF}_4$ ] $^+$ .

### 3.2 Identification of complex **7b-Au**

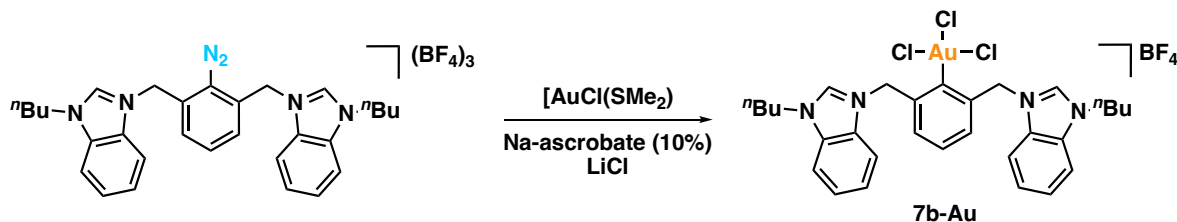

In glovebox, a solution of **5b** (10.4 mg, 0.014 mmol), LiCl (1.8 mg, 0.042 mmol), and  $[\text{Au}(\text{S}(\text{CH}_3)_2)\text{Cl}]$  (4.1 mg, 0.014 mmol) in DMSO (0.5 mL) was stirred at room temperature for 20 min at room temperature in the absence of light. Then, a solution of sodium ascorbate (1.0 mg, 5.0  $\mu\text{mol}$ ) in DMSO (0.5 mL) was added dropwise and the mixture was stirred for 1h. After this time an aliquot of 0.5 mL of the reaction mixture was collected and analyzed by ESI-MS in positive mode.

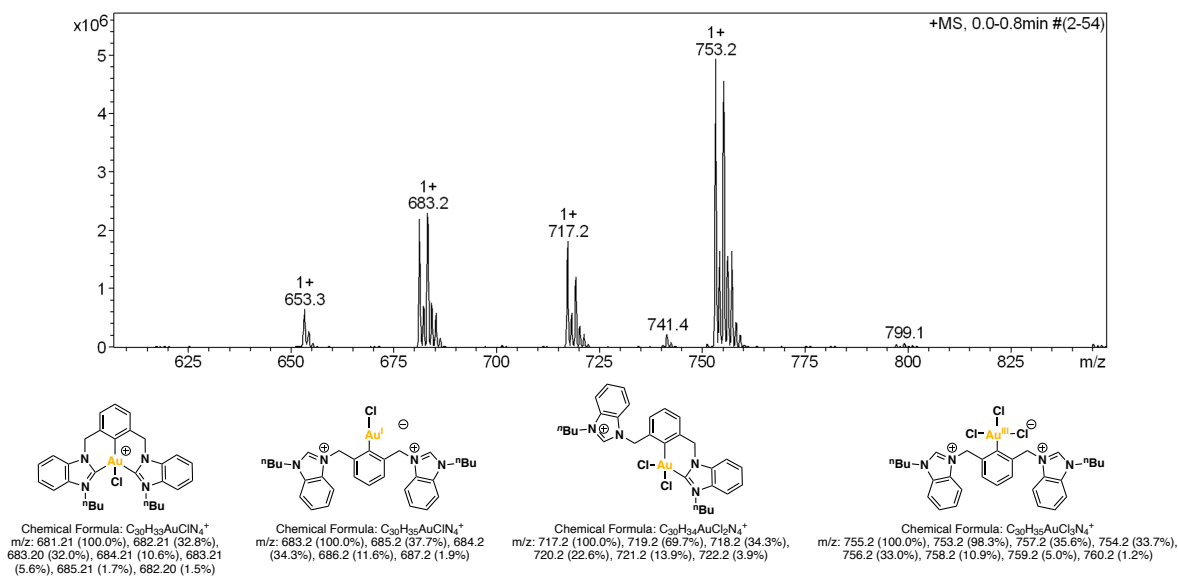

Figure S1. ESI-MS of the reaction mixture for the synthesis of complex **6b**.

### 3.3 Synthesis of complexes **8a** and **8b**

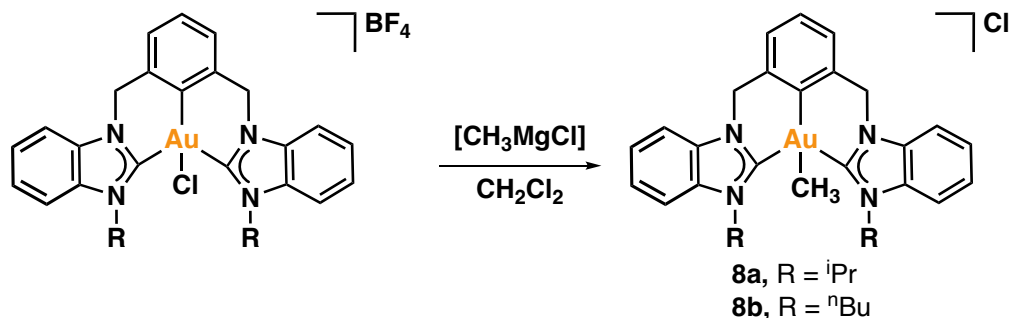

Scheme S7. Synthesis of **8a** and **8b**

In a glovebox, the gold complex (13.5  $\mu$ mol) was introduced into a vial and dissolved in  $CH_2Cl_2$  (3 mL). The vial, once sealed, was transferred out of the glovebox, connected to a Schlenk line, and purged with nitrogen. Subsequently,  $CH_3MgCl$  (10  $\mu$ L, 3 M solution in THF, 0.03 mmol) was injected into the solution using a syringe. The reaction was stirred at room temperature for 24h. Then, all the volatiles were removed under high vacuum, obtaining a white solid. The vial was then opened, and the resulting white solid was subjected to a washing step with  $CH_2Cl_2$  (3 x 2 mL). After filtration, the solution was concentrated under high vacuum, resulting in the isolation of a white solid.

**Complex 8a.** For the synthesis of **8a** was used compound **6a** (10.0mg, 13.5  $\mu$ mol). Yield: 8.8 mg (97%).

$^1H$  NMR (400 MHz,  $CD_3CN$ )  $\delta$  7.98 (d,  $J$  = 7.5 Hz, 2H,  $CH_{Bim}$ ), 7.95 (d,  $J$  = 7.5 Hz, 2H,  $CH_{Bim}$ ), 7.56 (td,  $J$  = 7.9, 1.2 Hz, 2H,  $CH_{Bim}$ ), 7.50 (td,  $J$  = 7.8, 1.2 Hz, 2H,  $CH_{Bim}$ ), 7.42 (d,  $J$  = 7.5 Hz, 2H,  $CH_{Ar}$ ), 7.07 (t,  $J$  = 7.5 Hz, 1H,  $CH_{Ar}$ ), 5.53 (d,  $J$  = 14.8 Hz, 2H,  $CH_2$ ), 5.38 – 5.26 (m, 4H, 2H

$CH_2$  and 2H  $CH_{iPr}$ , 1.90 (d,  $J = 7.0$  Hz, 6H,  $CH_{3iPr}$ ), 1.53 (d,  $J = 7.0$  Hz, 6H,  $CH_{3iPr}$ ), 1.02 (s, 3H, Au- $CH_3$ ).

$^{13}C\{^1H\}$  NMR (101 MHz,  $CD_3CN$ )  $\delta$  172.1 ( $C_{carbene-Au}$ ), 155.2 ( $C_{Ar-Au}$ ), 138.7 ( $C_{Ar}$ ), 135.5 ( $C_{BIm}$ ), 132.7 ( $C_{BIm}$ ), 127.6 ( $CH_{Ar}$ ), 127.4 ( $CH_{Ar}$ ), 126.0 ( $CH_{BIm}$ ), 125.5 ( $CH_{BIm}$ ), 115.6 ( $CH_{BIm}$ ), 113.5 ( $CH_{BIm}$ ), 54.8 ( $CH_2$ ), 54.7 ( $CH_{iPr}$ ), 22.2 ( $CH_{3iPr}$ ), 21.6 ( $CH_{3iPr}$ ), -1.7 (Au- $CH_3$ ).

Electrospray MS ( $m/z$ ): 633.2 [ $M-Cl$ ] $^+$ .

**Complex 8b.** For the synthesis of **8b** was used compound **6b** (10.4mg, 0.013mmol). Yield: 9.1 mg (97%)

$^1H$  NMR (400 MHz,  $CD_3CN$ )  $\delta$  7.98 (d,  $J = 7.2$  Hz, 2H,  $CH_{BIm}$ ), 7.83 – 7.72 (m, 2H,  $CH_{BIm}$ ), 7.62 – 7.49 (m, 4H,  $CH_{BIm}$ ), 7.44 (d,  $J = 7.5$  Hz, 2H,  $CH_{Ar}$ ), 7.08 (t,  $J = 7.5$  Hz, 1H,  $CH_{Ar}$ ), 5.56 (d,  $J = 14.9$  Hz, 2H,  $CH_2$ ), 5.23 (d,  $J = 14.8$  Hz, 2H,  $CH_2$ ), 4.67 – 4.51 (m, 4H,  $CH_{2Bu}$ ), 1.94 – 1.77 (m, 4H,  $CH_{2Bu}$ ), 1.34 – 1.10 (m, 4H,  $CH_{2Bu}$ ), 1.09 (s, 3H, Au- $CH_3$ ), 0.85 (t,  $J = 7.4$  Hz, 6H,  $CH_{3Bu}$ ).

$^{13}C\{^1H\}$  NMR (101 MHz,  $CD_3CN$ )  $\delta$  172.0 ( $C_{carbene-Au}$ ), 155.4 ( $C_{Ar-Au}$ ), 138.7 ( $C_{Ar}$ ), 134.7 ( $C_{BIm}$ ), 134.5 ( $C_{BIm}$ ), 127.7 ( $CH_{Ar}$ ), 127.5 ( $CH_{Ar}$ ), 126.2 ( $CH_{BIm}$ ), 125.9 ( $CH_{BIm}$ ), 113.8 ( $CH_{BIm}$ ), 113.1 ( $CH_{BIm}$ ), 55.0 ( $CH_2$ ), 48.5 ( $CH_{2Bu}$ ), 32.6 ( $CH_{2Bu}$ ), 20.5 ( $CH_{2Bu}$ ), 13.8 ( $CH_{3Bu}$ ), -2.4 (Au- $CH_3$ ).

Electrospray MS ( $m/z$ ): 661.2 [ $M-Cl$ ] $^+$ .

### 3.4 Synthesis of complexes **9a** and **9b**

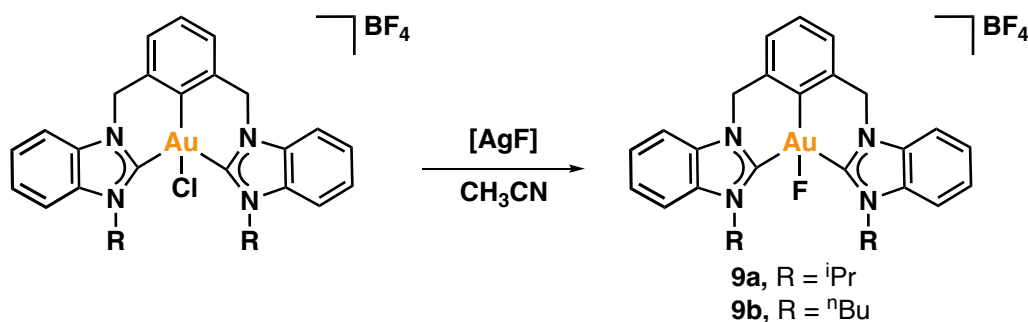

Scheme S8. Synthesis of **9a** and **9b**.

In a glovebox, a mixture of the corresponding gold(III)-Cl complex **6a** or **6b** (13.5  $\mu$ mol), AgF (10 mg, 78.8  $\mu$ mol), and  $CH_3CN$  (0.8 mL) was carefully transferred into an amber vial. The vial was tightly sealed and stirred at room temperature for 24h. Subsequently, the reaction mixture was carefully removed from the glovebox and the volatile components were evaporated under vacuum using the Schlenk line. Returning the vial inside the glovebox, dichloromethane was added to the remaining solid residue, and the resulting suspension was filtered, obtaining a clear colorless solution. Finally, white crystals were obtained by slow diffusion of  $n$ -hexane into the latter solution.

**Complex 9a.** For the synthesis of **9a** was used compound **6a** (10.0 mg, 13.5  $\mu\text{mol}$ ). Yield: 9.1 mg (93%)

$^1\text{H}$  NMR (400 MHz,  $\text{CD}_3\text{CN}$ )  $\delta$  8.04 – 7.90 (m, 4H,  $\text{CH}_{\text{Bim}}$ ), 7.64 – 7.50 (m, 4H,  $\text{CH}_{\text{Bim}}$ ), 7.52 – 7.41 (m, 2H,  $\text{CH}_{\text{Ar}}$ ), 7.26 (t,  $J = 7.5$  Hz, 1H,  $\text{CH}_{\text{Ar}}$ ), 5.90 – 5.76 (m, 2H,  $\text{CH}(\text{CH}_3)_2$ ), 5.62 (d,  $J = 15.2$  Hz, 4H,  $\text{CH}_2$ ), 5.53 (d,  $J = 15.2$  Hz, 2H,  $\text{CH}_2$ ), 1.83 (d,  $J = 6.8$  Hz, 6H,  $\text{CH}(\text{CH}_3)_2$ ), 1.67 (d,  $J = 6.5$  Hz, 6H,  $\text{CH}(\text{CH}_3)_2$ ).

$^{13}\text{C}\{^1\text{H}\}$  NMR (101 MHz,  $\text{CD}_3\text{CN}$ )  $\delta$  170.0 (d,  $^2J_{\text{CF}} = 2.6$  Hz,  $\text{C}_{\text{carbene-Au}}$ ), 137.1 (d,  $^3J_{\text{CF}} = 3.3$  Hz,  $\text{C}_{\text{Ar}}$ ), 134.3 ( $\text{C}_{\text{Bim}}$ ), 132.8 ( $\text{C}_{\text{Bim}}$ ), 129.5 (d,  $J = 3.3$  Hz,  $\text{CH}_{\text{Ar}}$ ), 129.1 ( $\text{CH}_{\text{Ar}}$ ), 126.3 ( $\text{CH}_{\text{Bim}}$ ), 126.0 ( $\text{CH}_{\text{Bim}}$ ), 124.1 (d,  $^2J = 37.0$  Hz,  $\text{C}_{\text{Ar-Au}}$ ), 115.7 ( $\text{CH}_{\text{Bim}}$ ), 113.7 ( $\text{CH}_{\text{Bim}}$ ), 54.19 (d,  $J = 10.6$  Hz,  $\text{CH}(\text{CH}_3)_2$ ), 53.2 ( $\text{CH}_2$ ), 22.1 ( $\text{CH}(\text{CH}_3)_2$ ), 21.5 ( $\text{CH}(\text{CH}_3)_2$ ).

$^{19}\text{F}$  NMR (377 MHz,  $\text{CD}_3\text{CN}$ )  $\delta$  -152.78 ( $\text{BF}_4$ ), -152.84 ( $\text{BF}_4$ ), -256.06 ( $\text{F-Au}$ ).

Electrospray MS ( $m/z$ ): 637.2 [ $\text{M-BF}_4$ ] $^+$ .

**Complex 9b.** For the synthesis of **9b** was used compound **6b** (10.4 mg, 13.5  $\mu\text{mol}$ ). Yield: 9.3 mg (91%)

$^1\text{H}$  NMR (400 MHz,  $\text{CD}_2\text{Cl}_2$ )  $\delta$  7.94 (d,  $J = 8.1$  Hz, 2H,  $\text{CH}_{\text{Bim}}$ ), 7.72 – 7.55 (m, 6H,  $\text{CH}_{\text{Bim}}$ ), 7.50 (d,  $J = 7.7$  Hz, 2H,  $\text{CH}_{\text{Ar}}$ ), 7.33 (t,  $J = 7.6$  Hz, 1H,  $\text{CH}_{\text{Ar}}$ ), 5.59 (d,  $J = 15.3$  Hz, 2H,  $\text{CH}_2$ ), 5.47 (d,  $J = 15.2$  Hz, 2H,  $\text{CH}_2$ ), 5.25 – 5.13 (m, 2H,  $\text{CH}_{2\text{Bu}}$ ), 4.64 – 4.53 (m, 2H,  $\text{CH}_{2\text{Bu}}$ ), 2.03 – 1.89 (m, 4H,  $\text{CH}_{2\text{Bu}}$ ), 1.53 – 1.28 (m, 4H,  $\text{CH}_{2\text{Bu}}$ ), 0.97 (t,  $J = 7.3$  Hz, 6H,  $\text{CH}_{3\text{Bu}}$ ).

$^{13}\text{C}\{^1\text{H}\}$  NMR (101 MHz,  $\text{CD}_2\text{Cl}_2$ )  $\delta$  169.2 ( $\text{C}_{\text{carbene-Au}}$ ), 136.0 ( $\text{C}_{\text{Ar}}$ ), 134.1 ( $\text{C}_{\text{Bim}}$ ), 132.8 ( $\text{C}_{\text{Bim}}$ ), 129.6 ( $\text{CH}_{\text{Ar}}$ ), 129.2 ( $\text{CH}_{\text{Ar}}$ ), 126.86 (dd,  $J = 241.0, 26.1$  Hz,  $\text{C}_{\text{Ar-Au}}$ ), 126.5 ( $\text{CH}_{\text{Bim}}$ ), 126.3 ( $\text{CH}_{\text{Bim}}$ ), 113.0 ( $\text{CH}_{\text{Bim}}$ ), 112.6 ( $\text{CH}_{\text{Bim}}$ ), 53.3 ( $\text{CH}_2$ , overlapped with the solvent), 47.4 ( $\text{CH}_{2\text{Bu}}$ ), 32.7 ( $\text{CH}_{2\text{Bu}}$ ), 20.5 ( $\text{CH}_{2\text{Bu}}$ ), 13.8 ( $\text{CH}_{3\text{Bu}}$ ).

$^{19}\text{F}$  NMR (377 MHz,  $\text{CD}_2\text{Cl}_2$ )  $\delta$  -153.2 ( $\text{BF}_4$ ), -153.3 ( $\text{BF}_4$ ), -260.1 ( $\text{Au-F}$ ).

Electrospray MS ( $m/z$ ): 665.2 [ $\text{M-BF}_4$ ] $^+$ .

**NOTE:** *If the complex is dissolved in non-anhydrous acetonitrile, it decomposes after a few hours.*

### 3.5 Synthesis of complex 10a

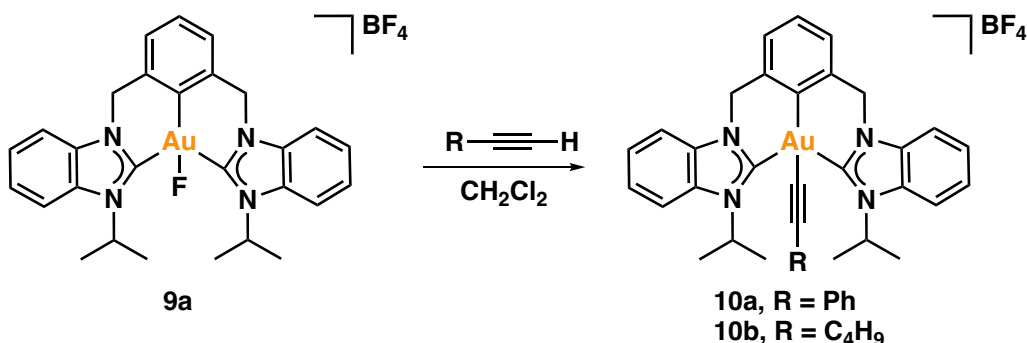

Scheme S9. Synthesis of complex **10a** and **10b**.

The reaction was conducted in an NMR tube. Phenylacetylene (100  $\mu$ L, 0.91 mmol) or 1-hexyne (100  $\mu$ L, 0.870 mmol) was added to a solution of freshly prepared complex **9a** (10.0 mg, 13.5  $\mu$ mol) in 0.7 mL of  $\text{CD}_2\text{Cl}_2$ . After 2 h, the  $^1\text{H}$  and  $^{19}\text{F}$  NMR spectra of the reaction mixture were acquired, confirming the completion of the reaction. Crystals of complex **10a** were grown by slow diffusion of n-hexane into the reaction mixture.

**Complex 10a.** Yield: >99%, quantitative (NMR).

$^1\text{H}$  NMR (400 MHz,  $\text{CD}_2\text{Cl}_2$ )  $\delta$  7.94 (d,  $J=8.3$ , 2H,  $\text{CH}_{\text{Bim}}$ ), 7.86 (d,  $J=8.3$ , 2H,  $\text{CH}_{\text{Bim}}$ ), 7.66 – 7.57 (m, 2H,  $\text{CH}_{\text{Bim}}$ ), 7.57 – 7.51 (m, 2H,  $\text{CH}_{\text{Bim}}$ ), 7.49 (d,  $J=7.5$ , 2H,  $\text{CH}_{\text{Ar}}$ ), 7.42 – 7.35 (m, 2H,  $\text{CH}_{\text{PhC}\equiv\text{C}}$ ), 7.35 – 7.26 (m, 3H,  $\text{CH}_{\text{PhC}\equiv\text{C}}$ ), 7.23 (t,  $J=7.5$ , 1H,  $\text{CH}_{\text{Ar}}$ ), 6.08 (hept,  $J=7.0$ , 2H,  $\text{CH}(\text{CH}_3)$ ), 5.54 (d,  $J=15.0$ , 2H,  $\text{CH}_2$ ), 5.41 (d,  $J=14.9$ , 2H,  $\text{CH}_2$ ), 1.84 (d,  $J=6.8$ , 6H,  $\text{CH}(\text{CH}_3)$ ), 1.64 (d,  $J=7.1$ , 6H,  $\text{CH}(\text{CH}_3)$ ).

$^{13}\text{C}\{^1\text{H}\}$  NMR (101 MHz,  $\text{CD}_2\text{Cl}_2$ )  $\delta$  166.0 ( $\text{C}_{\text{carbene-Au}}$ ), 140.2 ( $\text{C}_{\text{Ar-Au}}$ ), 137.3 ( $\text{C}_{\text{Ar}}$ ), 134.7 ( $\text{C}_{\text{Bim}}$ ), 132.1 ( $\text{C}_{\text{Bim}}$ ), 131.5 ( $\text{CH}_{\text{PhC}\equiv\text{C}}$ ), 128.8 ( $\text{CH}_{\text{PhC}\equiv\text{C}}$ ), 128.2 ( $\text{CH}_{\text{Ar}}$ ), 128.2 ( $\text{CH}_{\text{Ar}}$ ), 127.9 ( $\text{CH}_{\text{PhC}\equiv\text{C}}$ ), 126.0 ( $\text{CH}_{\text{Bim}}$ ), 125.6 ( $\text{CH}_{\text{Bim}}$ ), 125.5 ( $\text{C}_{\text{PhC}\equiv\text{C}}$ ), 115.0 ( $\text{CH}_{\text{Bim}}$ ), 112.8 ( $\text{CH}_{\text{Bim}}$ ), 111.5 ( $\text{PhC}\equiv\text{C-Au}$ ), 100.5 ( $\text{PhC}\equiv\text{C-Au}$ ), 55.7 ( $\text{CH}(\text{CH}_3)$ ), 54.3 ( $\text{CH}_2$ , overlapped with the solvent), 21.8 ( $\text{CH}(\text{CH}_3)$ ), 21.7 ( $\text{CH}(\text{CH}_3)$ ).

$^{19}\text{F}$  NMR (377 MHz,  $\text{CD}_2\text{Cl}_2$ )  $\delta$  = -153.6 ( $\text{BF}_4$ ), -153.7 ( $\text{BF}_4$ ).

Electrospray MS ( $m/z$ ): 719.2 [ $\text{M-BF}_4$ ] $^+$ .

**Complex 10b.** Yield: >99%, quantitative (NMR).

$^1\text{H}$  NMR (400 MHz,  $\text{CD}_2\text{Cl}_2$ )  $\delta$  7.92 – 7.84 (m, 4H,  $\text{CH}_{\text{Bim}}$ ), 7.60 (td,  $J=7.8$ , 1.2, 2H,  $\text{CH}_{\text{Bim}}$ ), 7.54 (td,  $J=7.9$ , 1.2, 2H,  $\text{CH}_{\text{Bim}}$ ), 7.44 (d,  $J=7.5$ , 2H,  $\text{CH}_{\text{Ar}}$ ), 7.20 (t,  $J=7.5$ , 1H,  $\text{CH}_{\text{Ar}}$ ), 6.09 (hept,  $J=6.8$ , 2H,  $\text{CH}(\text{CH}_3)$ ), 5.47 (d,  $J=14.9$ , 2H,  $\text{CH}_2$ ), 5.36 (s, 2H,  $\text{CH}_2$ ), 2.39 (td,  $J=7.2$ , 2.8, 2H,  $\text{CH}_{2\text{Bu}}$ ), 1.92 (d,  $J=6.8$ , 6H,  $\text{CH}(\text{CH}_3)$ ), 1.63 (d,  $J=7.1$ , 6H,  $\text{CH}(\text{CH}_3)$ ), 1.53 – 1.46 (m, 2H,  $\text{CH}_{2\text{Bu}}$ ), 1.46 – 1.34 (m, 2H,  $\text{CH}_{2\text{Bu}}$ ), 0.90 (t,  $J=7.3$ , 3H,  $\text{CH}_{3\text{Bu}}$ ).

$^{13}\text{C}\{^1\text{H}\}$  NMR (101 MHz,  $\text{CD}_2\text{Cl}_2$ )  $\delta$  166.2 ( $\text{C}_{\text{carbene-Au}}$ ), 140.9 ( $\text{C}_{\text{Ar-Au}}$ ), 137.4 ( $\text{C}_{\text{Ar}}$ ), 134.6 ( $\text{C}_{\text{Bim}}$ ), 132.1 ( $\text{C}_{\text{Bim}}$ ), 128.0 ( $\text{CH}_{\text{Ar}}$ ), 128.0 ( $\text{CH}_{\text{Ar}}$ ), 125.9 ( $\text{CH}_{\text{Bim}}$ ), 125.5 ( $\text{CH}_{\text{Bim}}$ ), 115.0 ( $\text{CH}_{\text{Bim}}$ ), 112.7 ( $\text{CH}_{\text{Bim}}$ ), 55.3 ( $\text{CH}(\text{CH}_3)$ ), 54.3 ( $\text{CH}_2$ , overlapped with the solvent), 32.2 ( $\text{CH}_2\text{Bu}$ ), 22.7 ( $\text{CH}_2\text{Bu}$ ), 21.7 ( $\text{CH}(\text{CH}_3)$ ), 21.6 ( $\text{CH}(\text{CH}_3)$ ), 21.2 ( $\text{CH}_2\text{Bu}$ ), 13.9 ( $\text{CH}_3\text{Bu}$ ).

$^{19}\text{F}$  NMR (377 MHz,  $\text{CD}_2\text{Cl}_2$ )  $\delta$  = -153.1 ( $\text{BF}_4$ ), -153.1 ( $\text{BF}_4$ ).

Electrospray MS ( $m/z$ ): 699.3 [ $\text{M}-\text{BF}_4$ ] $^+$ .

### 3.6 Synthesis of complex **11a**

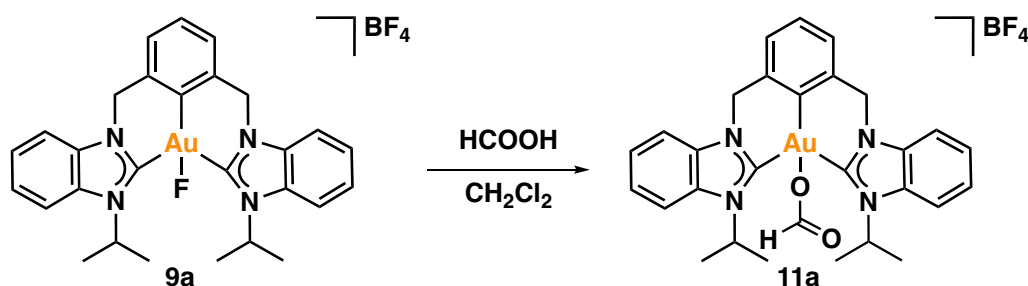

Scheme S10. Synthesis of complex **11a**

The reaction was conducted in an NMR tube. Formic acid (0.05 mL, 1.3 mmol) was added to a solution of freshly prepared complex **9a** (10.0 mg, 13.5  $\mu\text{mol}$ ) in 0.7 mL of  $\text{CD}_2\text{Cl}_2$ . After 15 min, the  $^1\text{H}$  and  $^{19}\text{F}$  NMR spectra of the reaction mixture were acquired, confirming the completion of the reaction. Crystals of complex **11a** were grown by slow diffusion of diethyl ether into the reaction mixture.

Yield: *quantitative (NMR)*.

$^1\text{H}$  NMR (400 MHz,  $\text{CD}_2\text{Cl}_2$ )  $\delta$  8.91 (s, 1H,  $\text{HCOO}$ ), 7.92 (d,  $J$  = 8.3 Hz, 2H,  $\text{CH}_{\text{Bim}}$ ), 7.83 (d,  $J$  = 8.3 Hz, 2H,  $\text{CH}_{\text{Bim}}$ ), 7.66 – 7.58 (m, 2H,  $\text{CH}_{\text{Bim}}$ ), 7.58 – 7.50 (m, 2H,  $\text{CH}_{\text{Bim}}$ ), 7.47 (d,  $J$  = 7.6 Hz, 2H,  $\text{CH}_{\text{Ar}}$ ), 7.30 (t,  $J$  = 7.5 Hz, 1H,  $\text{CH}_{\text{Ar}}$ ), 5.62 – 5.48 (m, 4H,  $\text{CH}_2$ ), 5.31 (h,  $J$  = 7.3 Hz, 2H,  $\text{CH}(\text{CH}_3)$ ), 1.81 (d,  $J$  = 7.0 Hz, 6H,  $\text{CH}(\text{CH}_3)$ ), 1.66 (d,  $J$  = 7.0 Hz, 6H,  $\text{CH}(\text{CH}_3)$ ).

$^{13}\text{C}\{^1\text{H}\}$  NMR (101 MHz,  $\text{CD}_2\text{Cl}_2$ )  $\delta$  169.0 ( $\text{C}_{\text{carbene-Au}}$ ), 167.1 ( $\text{HCOO}$ ), 136.3 ( $\text{C}_{\text{Ar}}$ ), 134.2 ( $\text{C}_{\text{Bim}}$ ), 132.0 ( $\text{C}_{\text{Bim}}$ ), 129.3 ( $\text{CH}_{\text{Ar}}$ ), 129.1 ( $\text{CH}_{\text{Ar}}$ ), 127.6 ( $\text{C}_{\text{Ar-Au}}$ ), 126.3 ( $\text{CH}_{\text{Bim}}$ ), 125.8 ( $\text{CH}_{\text{Bim}}$ ), 115.1 ( $\text{CH}_{\text{Bim}}$ ), 112.9 ( $\text{CH}_{\text{Bim}}$ ), 54.3 ( $\text{CH}(\text{CH}_3)$ ), 53.2 ( $\text{CH}_2$ ), 21.8 ( $\text{CH}(\text{CH}_3)$ ), 21.3 ( $\text{CH}(\text{CH}_3)$ ).

$^{19}\text{F}$  NMR (377 MHz,  $\text{CD}_2\text{Cl}_2$ )  $\delta$  = -153.4 ( $\text{BF}_4$ ), -153.5 ( $\text{BF}_4$ ).

Electrospray MS ( $m/z$ ): 663.2 [ $\text{M}-\text{BF}_4$ ] $^+$ .

### 3.7 Synthesis of complex 12a

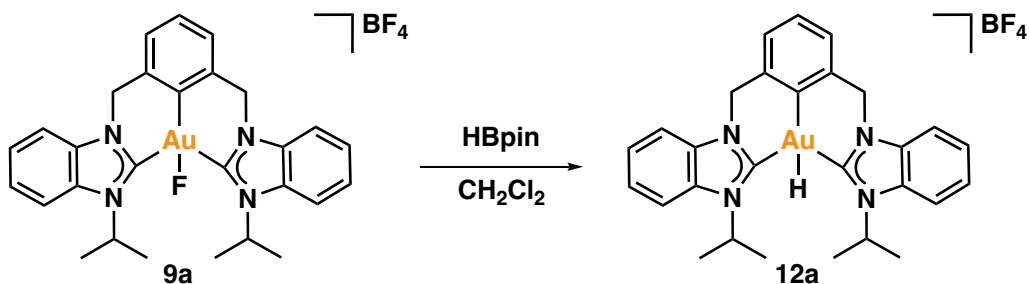

Scheme S11. Synthesis of **12a**.

In a glovebox, Hbpin (10  $\mu$ L, 68.9  $\mu$ mol) was added to a vial containing a solution of pincer **9a** (5.0 mg, 6.9  $\mu$ mol) in CH<sub>2</sub>Cl<sub>2</sub> (1 mL). The vial was sealed, removed from the glovebox and stirred at room temperature for 1h. Subsequently, white crystals were obtained through slow diffusion of *n*-hexane into the solution. The crystals were separated by decantation, washed with THF (1.5 mL) and pentane (1.5 mL), and finally dried under high vacuum. Yield: 4.3 mg (89%)

<sup>1</sup>H NMR (400 MHz, CD<sub>2</sub>Cl<sub>2</sub>)  $\delta$  7.94 – 7.85 (m, 4H, CH<sub>Bim</sub>), 7.65 – 7.49 (m, 6H, 4H CH<sub>Bim</sub> and 2H CH<sub>Ar</sub>), 7.26 (t, *J* = 7.5 Hz, 1H, CH<sub>Ar</sub>), 5.56 – 5.42 (m, 6H, 4H CH<sub>2</sub> and 2H CH(CH<sub>3</sub>)<sub>2</sub>), 1.79 (d, *J* = 7.1 Hz, 12H, CH(CH<sub>3</sub>)<sub>2</sub>), 1.43 (s, 1H, Au–H).

<sup>13</sup>C{<sup>1</sup>H} NMR (101 MHz, CD<sub>2</sub>Cl<sub>2</sub>)  $\delta$  167.5 (C<sub>carbene</sub>–Au), 151.6 (C<sub>Ar</sub>–Au), 136.8 (C<sub>Ar</sub>), 135.1 (C<sub>Bim</sub>), 131.7 (C<sub>Bim</sub>), 127.9 (CH<sub>Ar</sub>), 127.5 (CH<sub>Ar</sub>), 125.8 (CH<sub>Bim</sub>), 125.5 (CH<sub>Bim</sub>), 114.8 (CH<sub>Bim</sub>), 112.6 (CH<sub>Bim</sub>), 56.7 (CH(CH<sub>3</sub>)<sub>2</sub>), 54.8 (CH<sub>2</sub>), 21.1 (CH(CH<sub>3</sub>)<sub>2</sub>).

Electrospray MS (*m/z*): 619.2 [M–BF<sub>4</sub>]<sup>+</sup>.

#### 4 Reaction mechanism of the synthesis of Au(III) pincer complexes

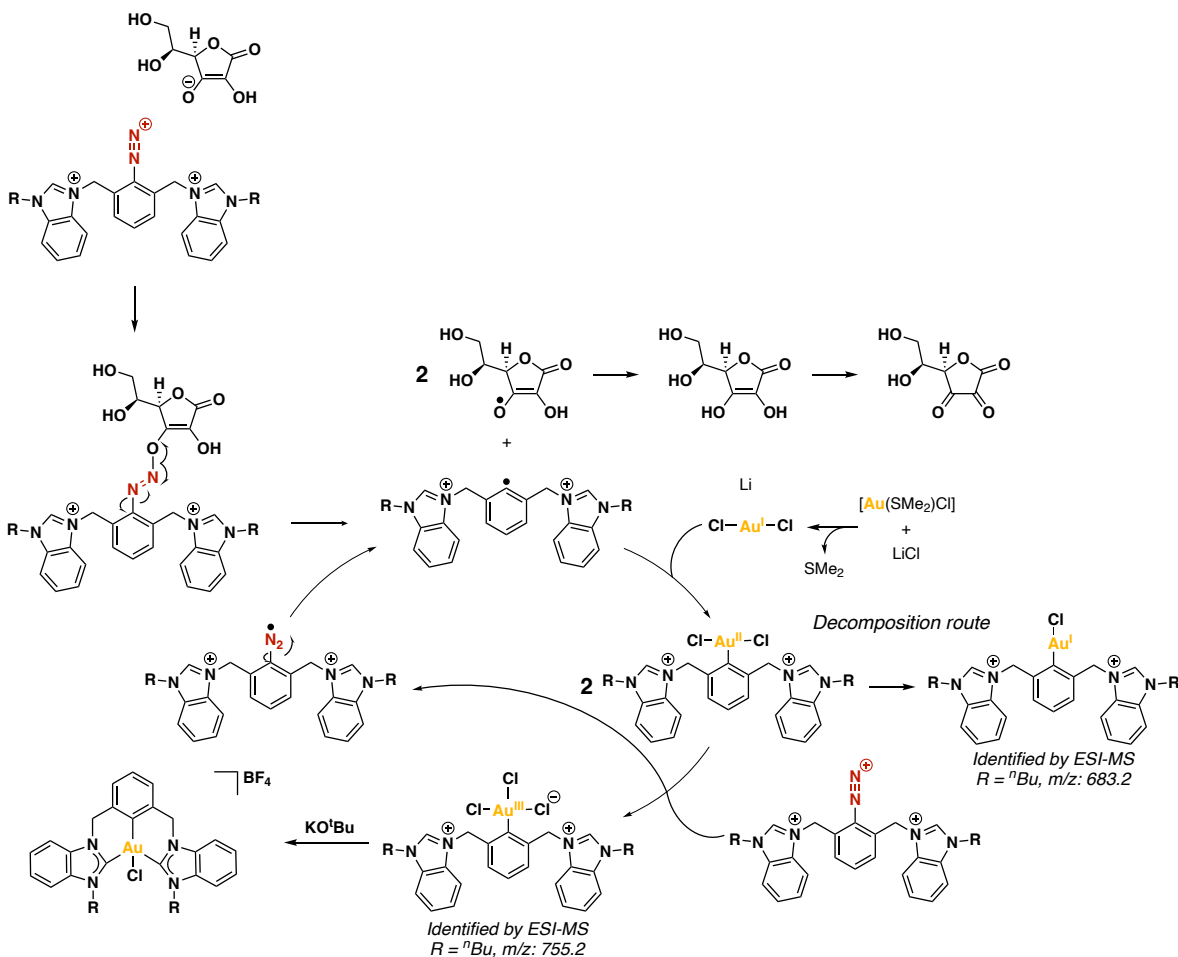

Scheme S12. Proposed reaction mechanism of the synthesis of pincer Au(III) complexes in the presence of ascorbic acid.



## 5 Reactivity experiments of Au(III) complexes

### 5.1 Thermal stability of complex **11a**

A solution containing 5 mg of complex **11a** in CD<sub>2</sub>Cl<sub>2</sub> or 1,2-dichloroethane was subjected to heating at 60°C or 100°C, respectively, for a duration of 24h. Following this period, the <sup>1</sup>H NMR spectra were recorded.

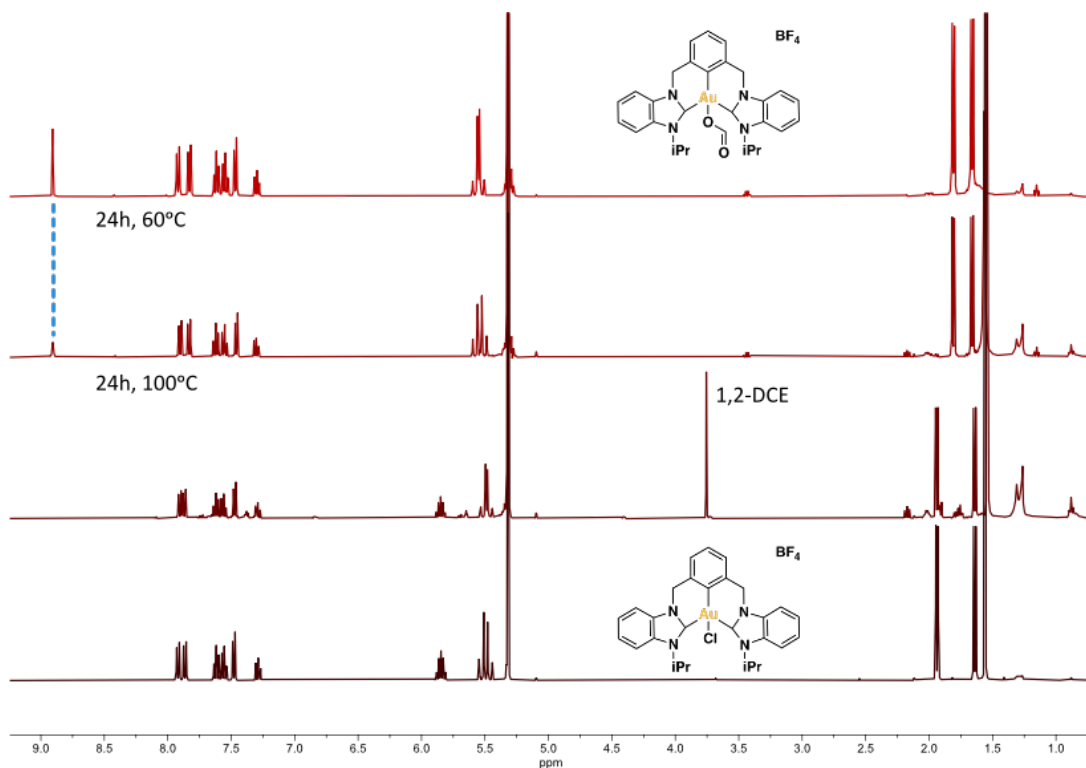

Figure S2. <sup>1</sup>H NMR (400 MHz, 298 K) of complex **11a** after undergoing heating at 60°C and 100°C in CD<sub>2</sub>Cl<sub>2</sub>

### 5.2 Reactivity of Au(III) pincer complexes towards formic acid (HCOOH)

A solution containing complex **8b**, **9a** or **12a** (13.5 μmol) and formic acid (10 μL, 0.3 mmol) in 0.5 mL of deuterated solvent was prepared. The solution was subjected to heating at various temperatures during the desired time. The progress of the reaction was monitored using <sup>1</sup>H NMR and ESI-MS.

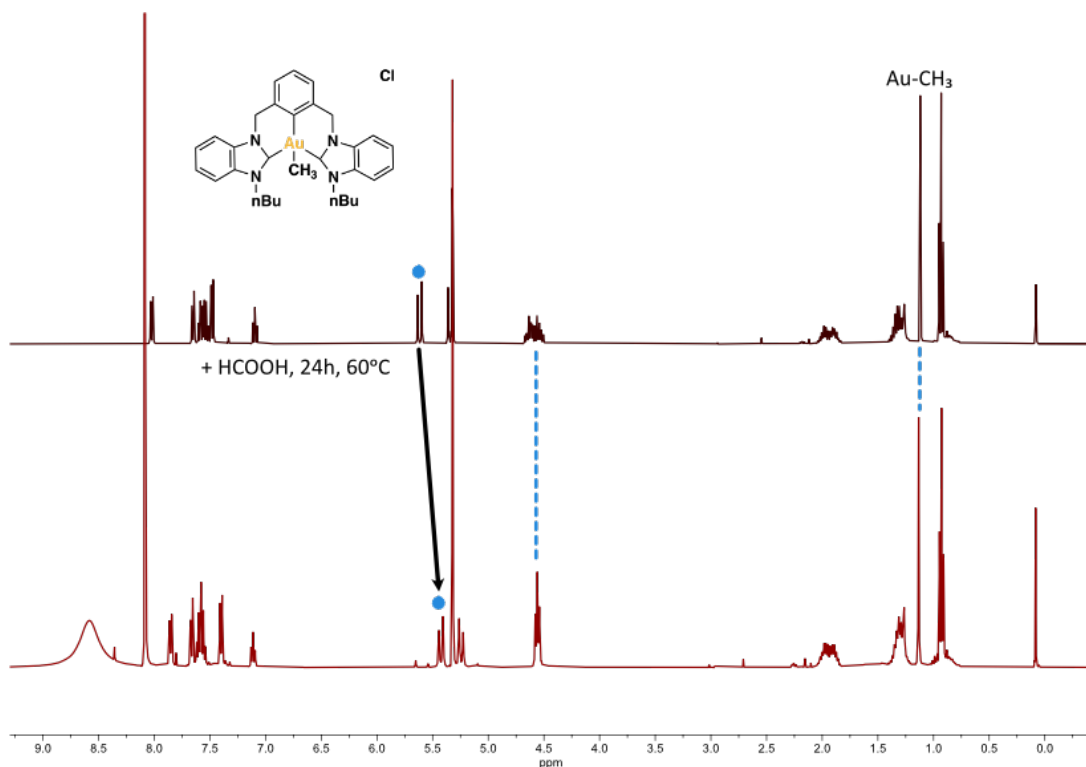

Figure S3.  $^1\text{H}$  NMR (400MHz, 298K) of the reaction of complex **8b** and  $\text{HCOOH}$  in  $\text{CD}_2\text{Cl}_2$

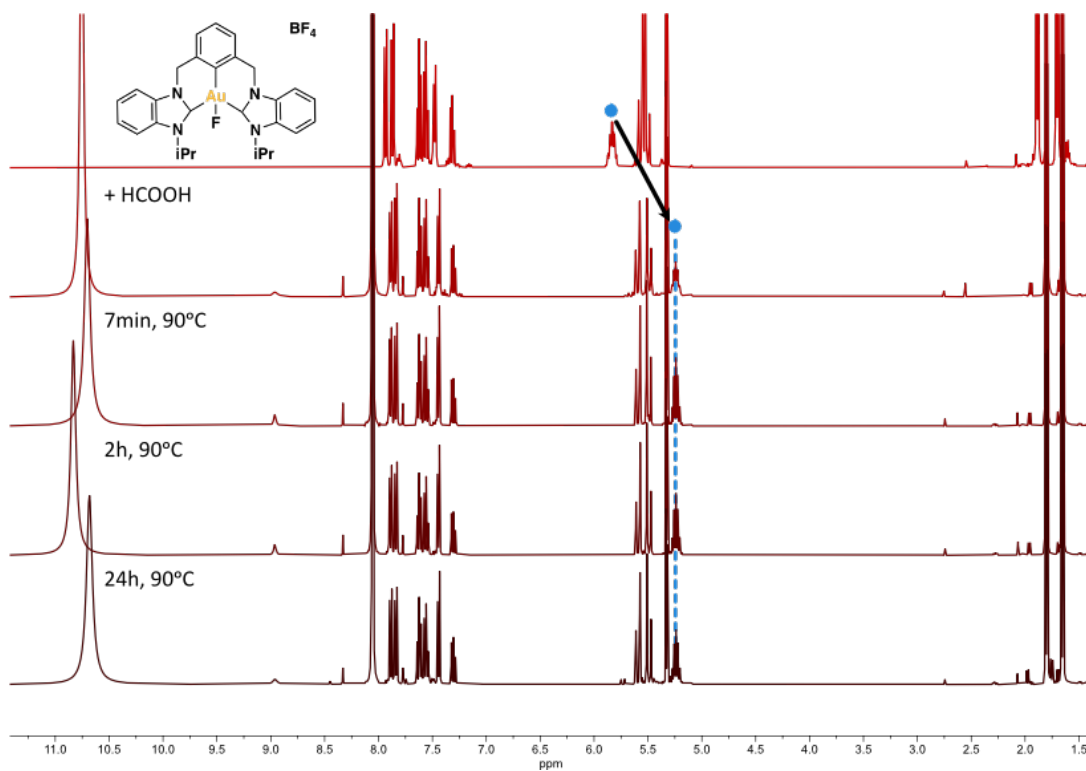

Figure S4.  $^1\text{H}$  NMR (400MHz, 298K) of the reaction profile of complex **9a** and  $\text{HCOOH}$  in  $\text{CD}_2\text{Cl}_2$

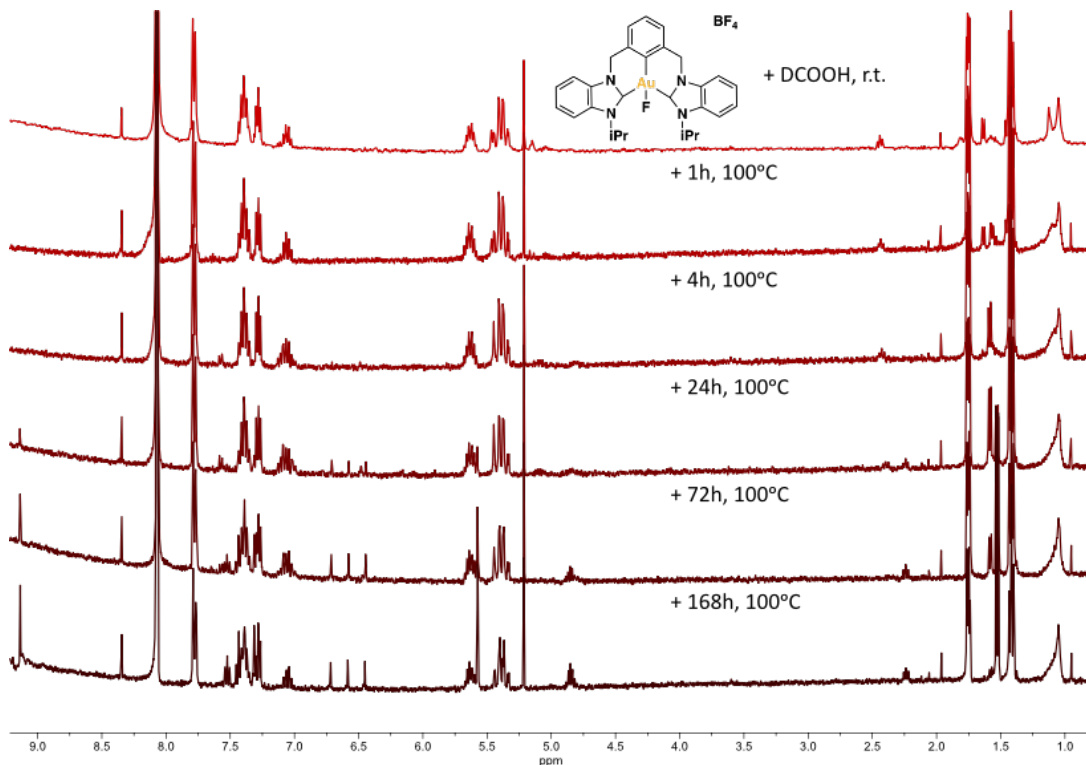

Figure S5.  $^1\text{H}$  NMR (400MHz, 298K) of complex **9a** at  $100^\circ\text{C}$  in DCOOH

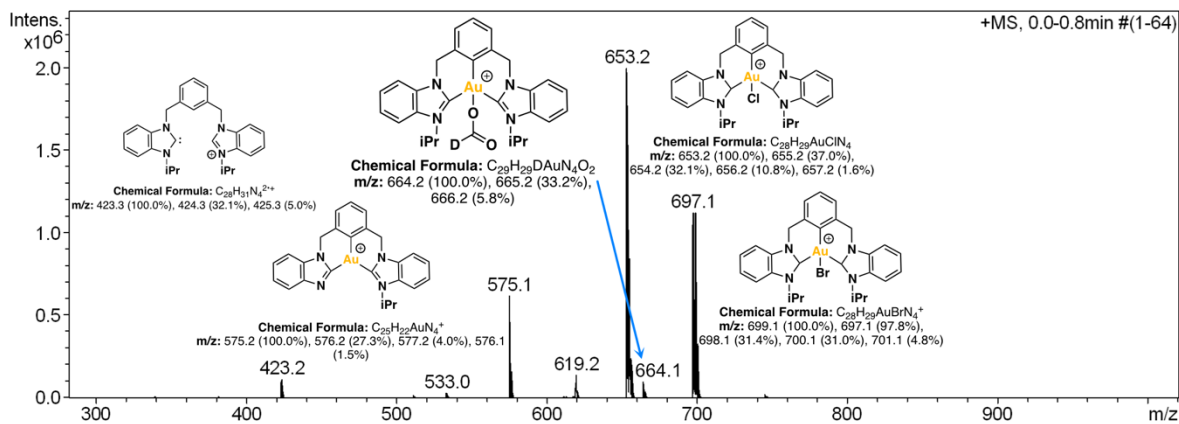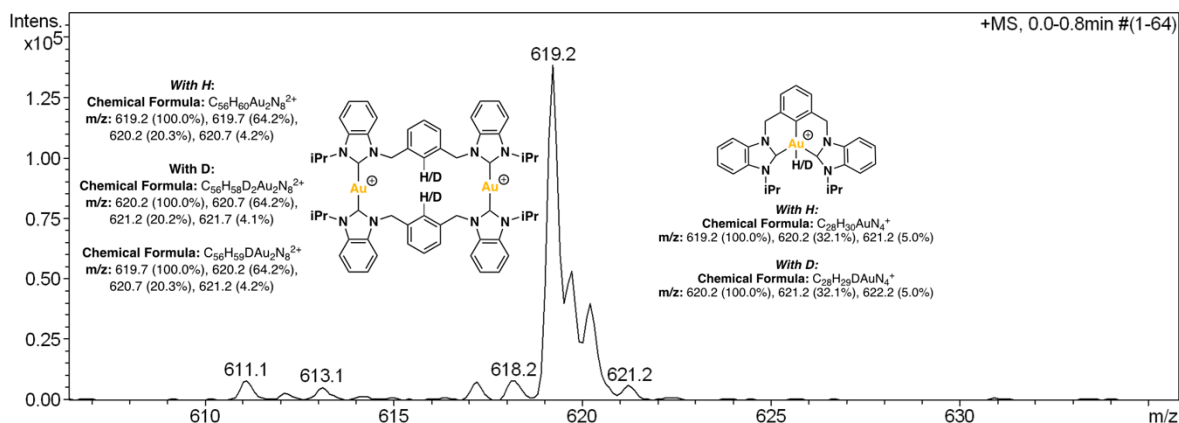

Figure S6. ESI-MS spectrum of the reaction of complex **9a** and DCOOH at  $100^\circ\text{C}$  for 168h

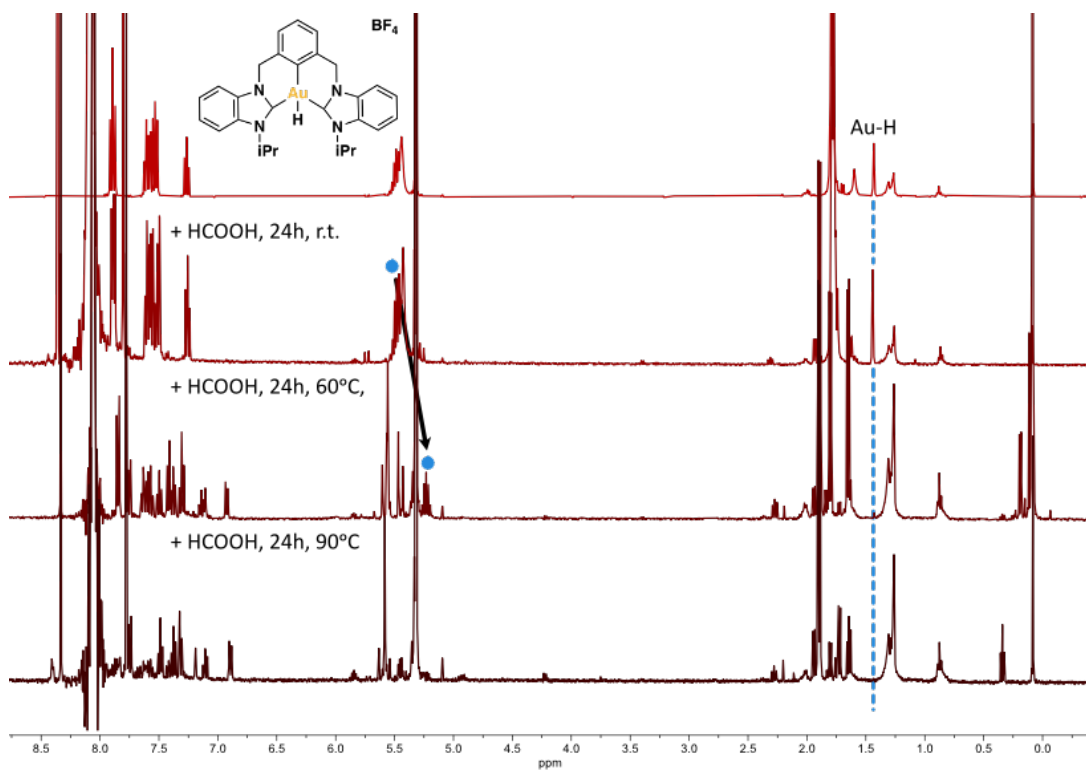

Figure S7.  $^1\text{H}$  NMR (400MHz, 298K) of the reaction of complex **12a** and  $\text{HCOOH}$  at different temperatures in  $\text{CD}_2\text{Cl}_2$

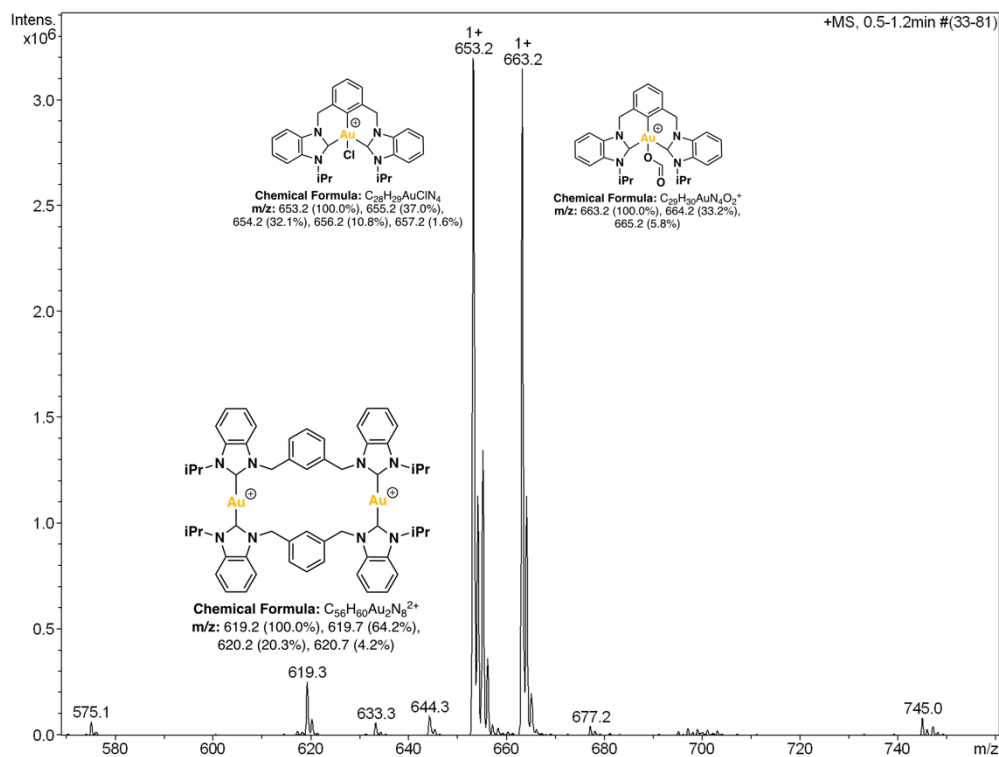

Figure S8. ESI-MS spectrum of the reaction of complex **12a** and  $\text{HCOOH}$  at 60°C

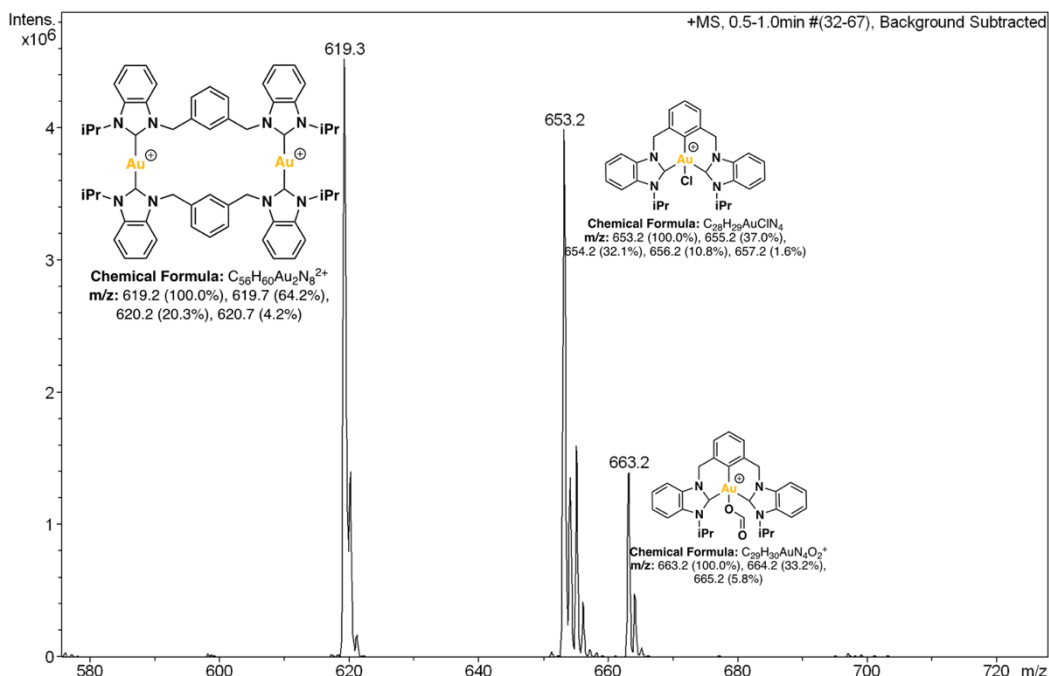

Figure S9. ESI-MS spectrum of the reaction of complex **12a** and HCOOH at 90°C

Compound **13a** was isolated from the reaction mixture of **12a** and HCOOH at 90°C. The isolation was achieved through slow diffusion of diethyl ether into the reaction mixture. Yield: 8.6mg(90%)

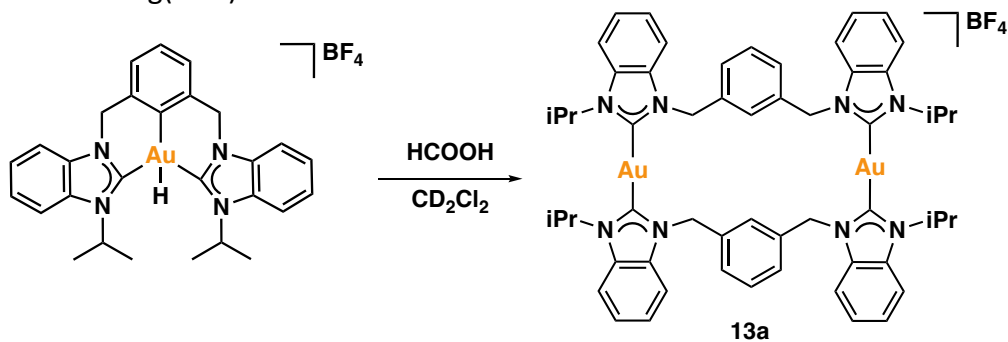

Scheme S13. Synthesis of **13a**

$^1H$  NMR (400 MHz,  $CD_2Cl_2$ )  $\delta$  7.73 (d,  $J = 8.3$  Hz, 2H,  $CH_{BIm}$ ), 7.53 – 7.42 (m, 2H,  $CH_{BIm}$ ), 7.37 (d,  $J = 4.8$  Hz, 5H, 4H  $CH_{BIm}$  and 1H  $CH_{Ar}$ ), 7.06 (t,  $J = 7.8$  Hz, 1H,  $CH_{Ar}$ ), 6.85 (d,  $J = 2.0$  Hz, 2H,  $CH_{Ar}$ ), 5.65 (s, 4H,  $CH_2$ ), 5.43 – 5.31 (m, 2H,  $CH(CH_3)_2$ ), 1.91 (d,  $J = 6.8$  Hz, 12H,  $CH(CH_3)_2$ ).

$^{13}C\{^1H\}$  NMR (101 MHz,  $CD_2Cl_2$ )  $\delta$  189.7 ( $C_{carbene-Au}$ ), 136.6 ( $C_{Ar}$ ), 134.2 ( $C_{BIm}$ ), 132.8 ( $C_{BIm}$ ), 129.9 ( $CH_{Ar}$ ), 125.8 ( $CH_{Ar}$ ), 125.7 ( $CH_{Ar}$ ), 125.6 ( $CH_{BIm}$ ), 125.3 ( $CH_{BIm}$ ), 113.2 ( $CH_{BIm}$ ), 112.8 ( $CH_{BIm}$ ), 53.8 ( $CH_2$ , overlapped with the solvent), 52.2 ( $CH(CH_3)_2$ ), 23.0 ( $CH(CH_3)_2$ ).

Electrospray MS (m/z): 619.2 [ $M-(BF_4)_2$ ] $^{2+}$ , 1326.5 [ $M-BF_4$ ]

### 5.3 Reactivity of **12a** towards triflic acid

A solution containing complex **12a** (13.5  $\mu\text{mol}$ ) and triflic acid (2.4  $\mu\text{L}$ , 27.0  $\mu\text{mol}$ ) in 0.5 mL of  $\text{CD}_2\text{Cl}_2$  was prepared at room temperature. The progress of the reaction was monitored using  $^1\text{H}$  NMR and MS, observing the formation of **13a** within minutes.

### 5.4 Reactivity of Au(III) pincer complexes towards sodium hydride (NaH)

A solution containing complex **8b** or **12a** (13.5  $\mu\text{mol}$ ) and NaH (5.0 mg, 0.21 mmol) in 0.5 mL of  $\text{CD}_2\text{Cl}_2$  was prepared. The solution was subjected to heating at various temperatures and durations. The progress of the reaction was monitored using  $^1\text{H}$  NMR.

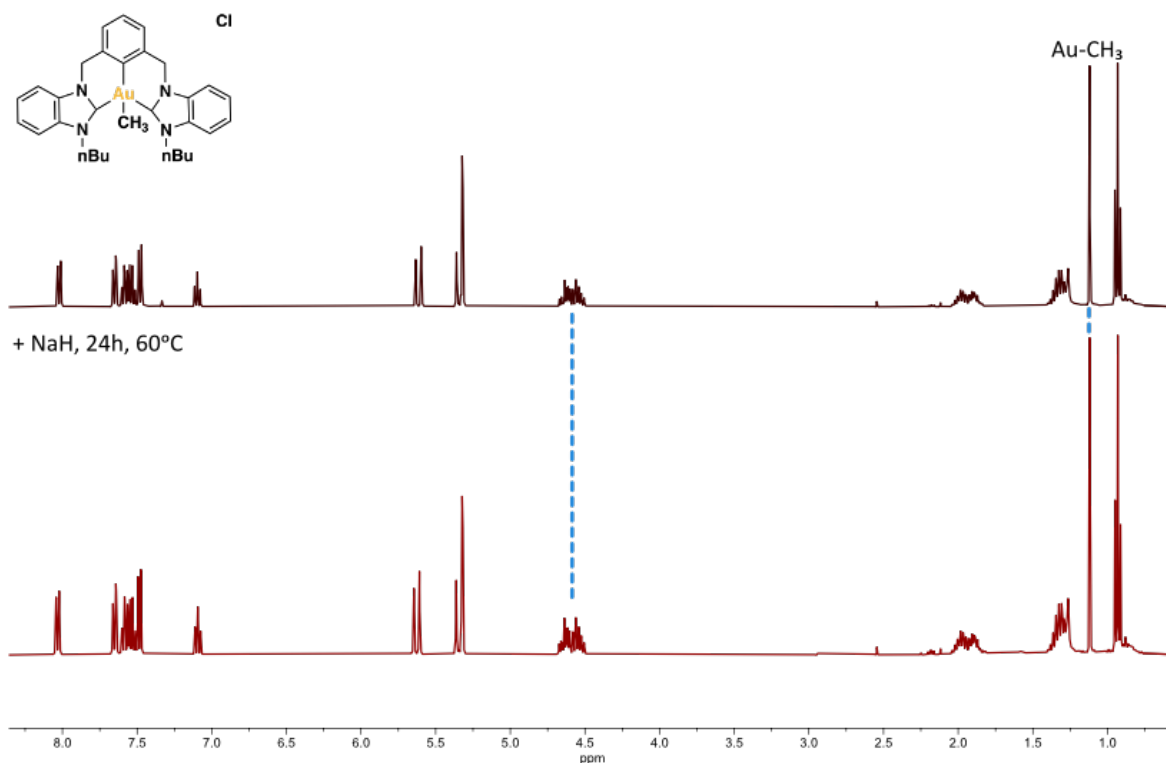

Figure S10.  $^1\text{H}$  NMR (400MHz, 298K) of the reaction of complex **8b** and NaH at 60°C in  $\text{CD}_2\text{Cl}_2$

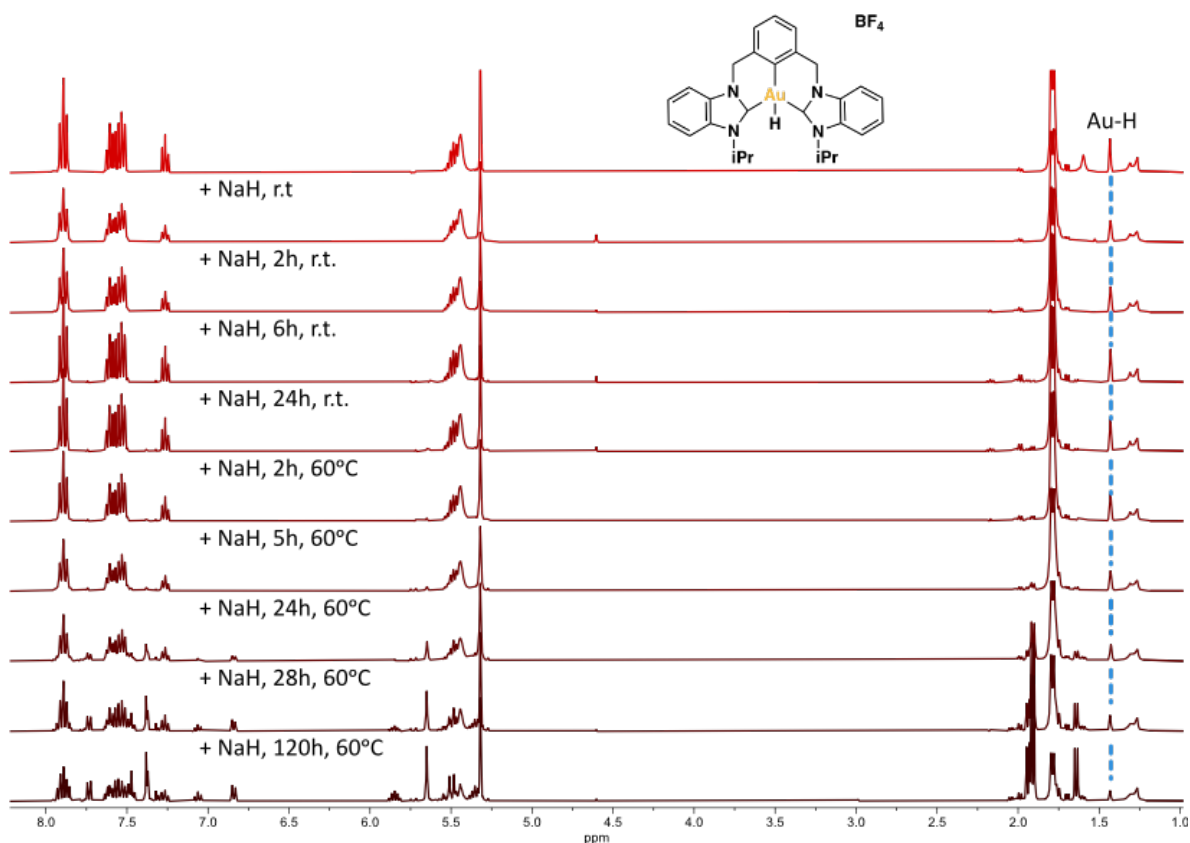

Figure S11.  $^1\text{H}$  NMR (400MHz, 298K) of the reaction of complex **12a** and NaH, from r.t to  $60^\circ\text{C}$  in  $\text{CD}_2\text{Cl}_2$

Compound **13a** was observed at the end of the reaction of **12a** and NaH at  $60^\circ\text{C}$ . This result was corroborated by ESI-MS (Figure S12).

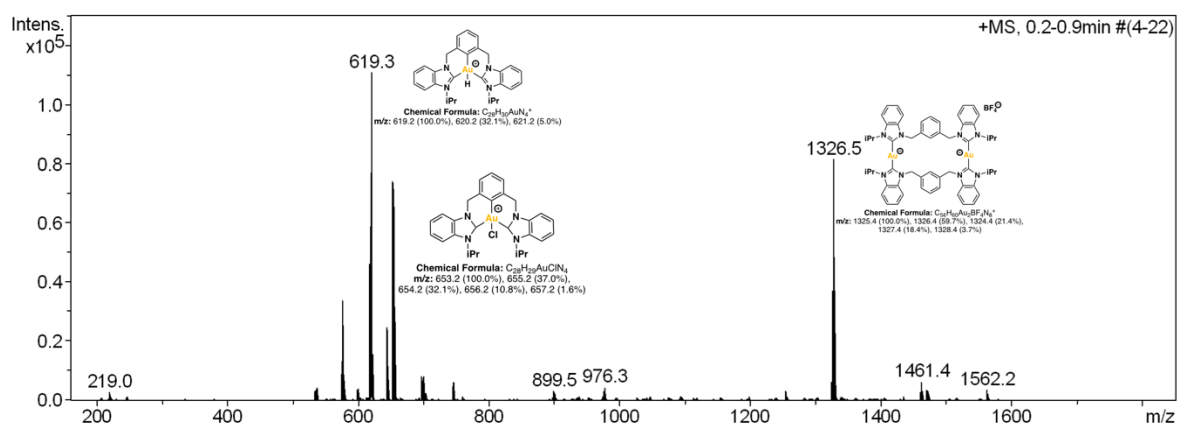

Figure S12. ESI-MS spectrum of the reaction of complex **12a** and NaH at  $60^\circ\text{C}$

## 6 Catalytic studies of CCC–NHC Au(III) pincer complex **6a**

A solution of complex **6a** (2.0 mg, 2.7  $\mu\text{mol}$ ),  $\omega$ -alkynylfuran (0.54 mmol),  $[\text{NaSbF}_6]$  (5.6 mg, 21.6  $\mu\text{mol}$ ) in  $\text{CDCl}_3$  (0.6 mL) was heated at 60°C for 16h. After this period, the reaction mixture was allowed to cool to room temperature, and  $^1\text{H}$  NMR was collected. The reaction yield was determined by  $^1\text{H}$  NMR using 1,3,5-trimethoxybenzene as an internal standard.



## 7 NMR Spectra

### 7.1 NMR spectra of compound 2

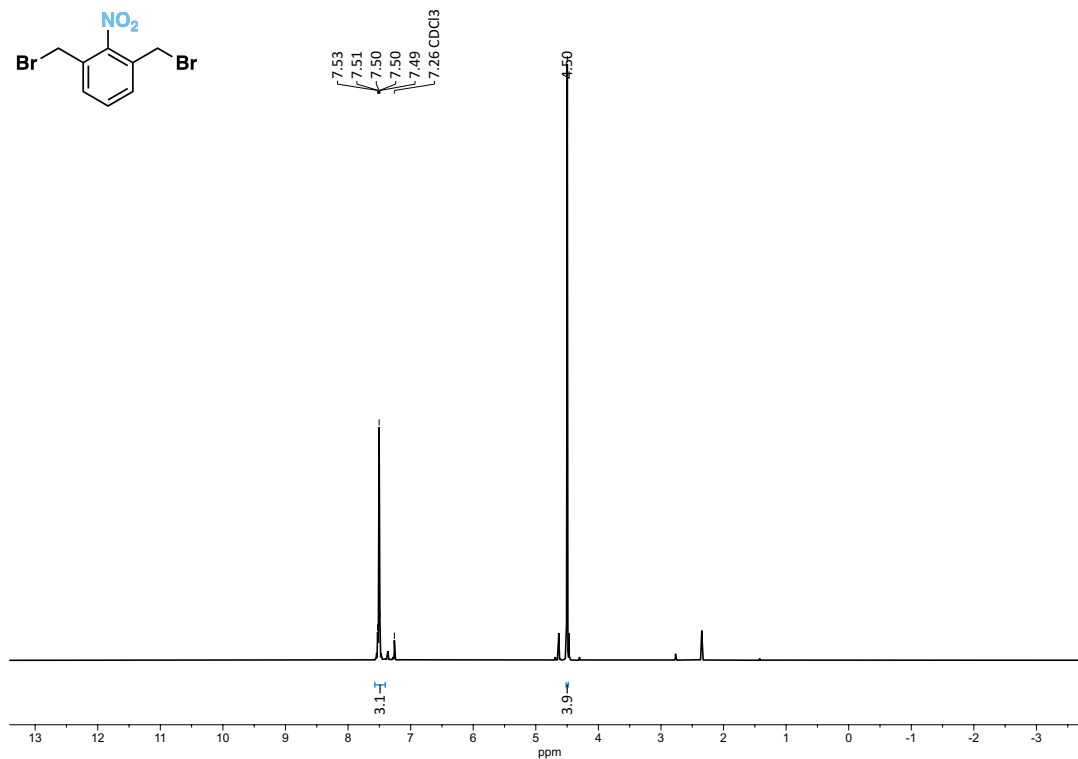

Figure S13.  $^1\text{H}$  NMR (400MHz, 298K) of **2** in  $\text{CDCl}_3$

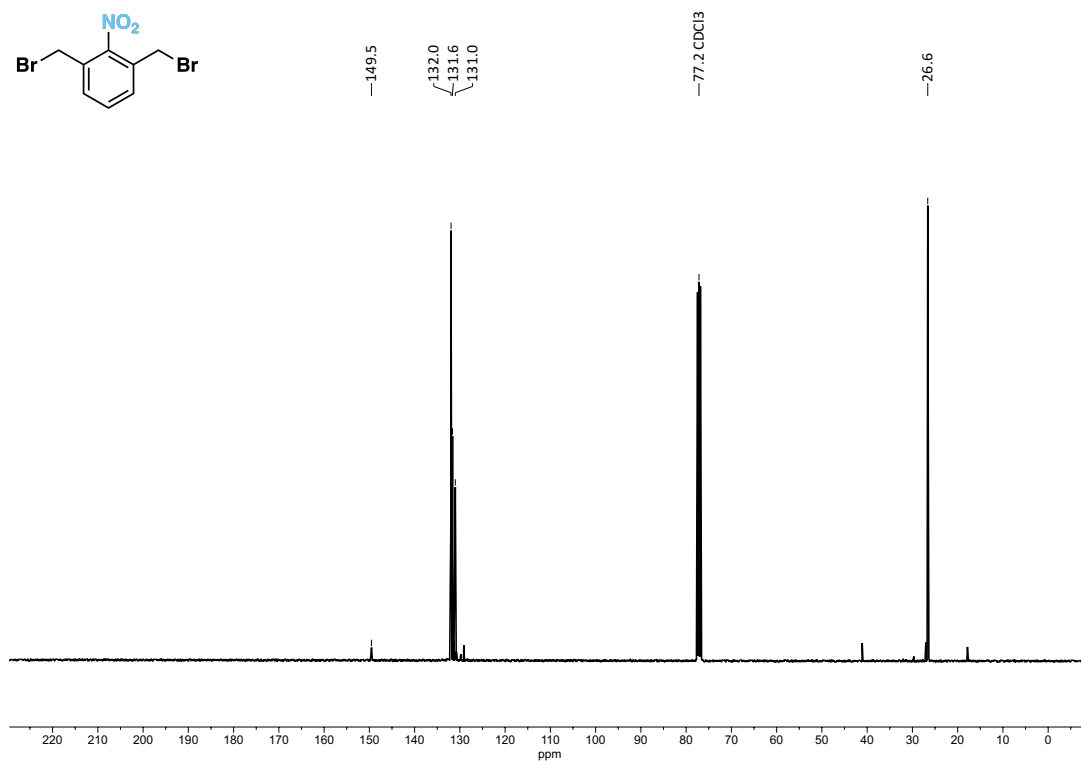

Figure S14.  $^{13}\text{C}\{^1\text{H}\}$  NMR (101MHz, 298K) of **2** in  $\text{CDCl}_3$

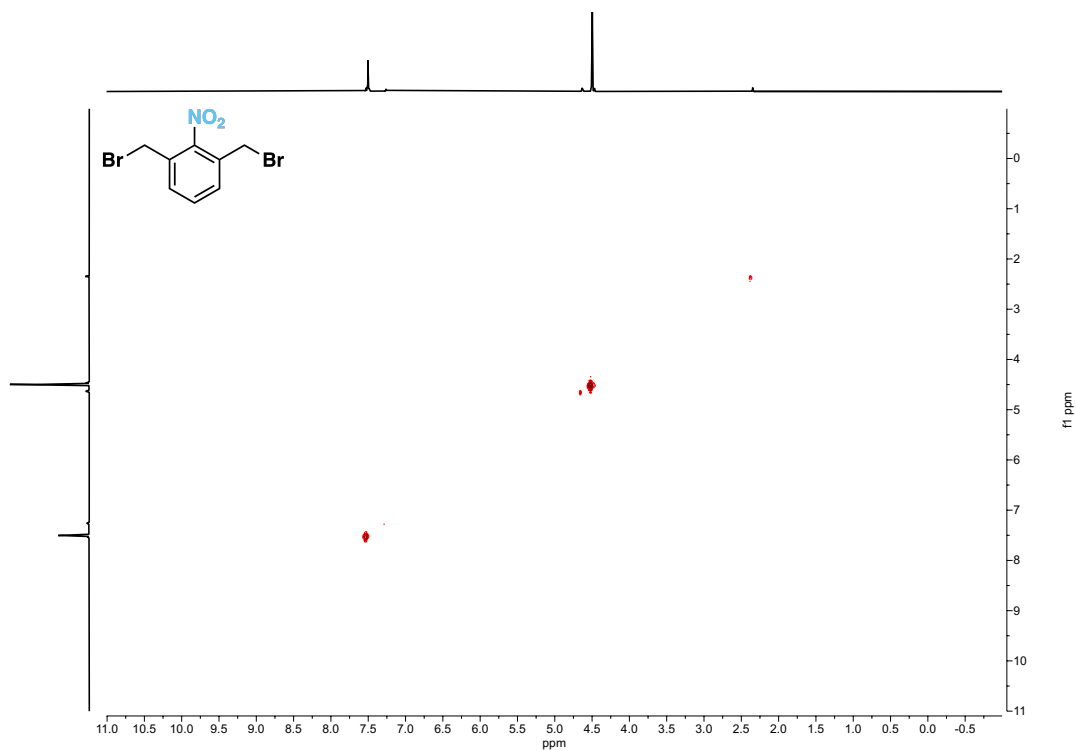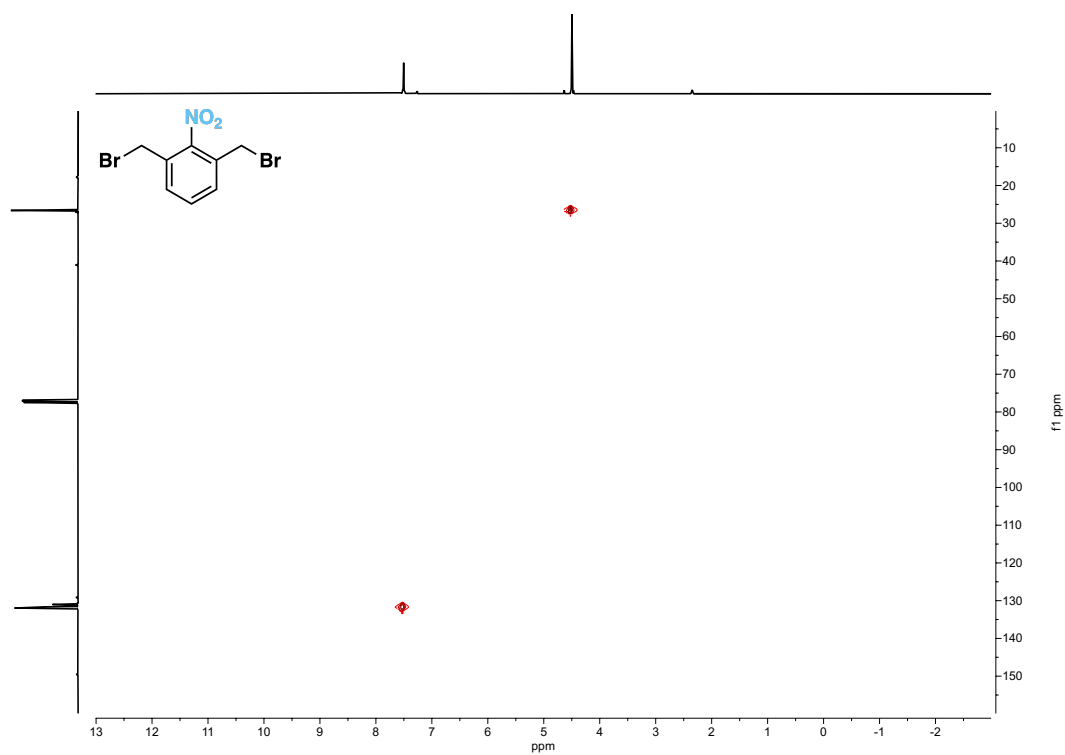

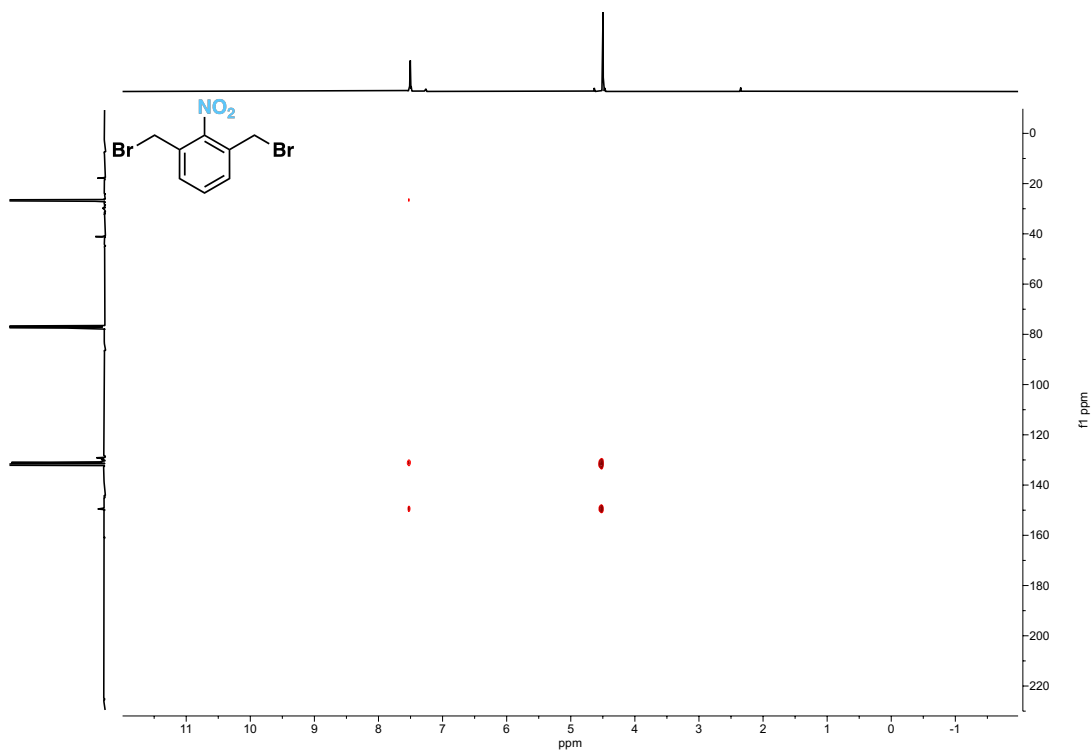

Figure S17.  $^1\text{H}$ ,  $^{13}\text{C}$  HMBC NMR (400MHz, 298K) of **2** in  $\text{CDCl}_3$

## 7.2 NMR spectra of compound 3a

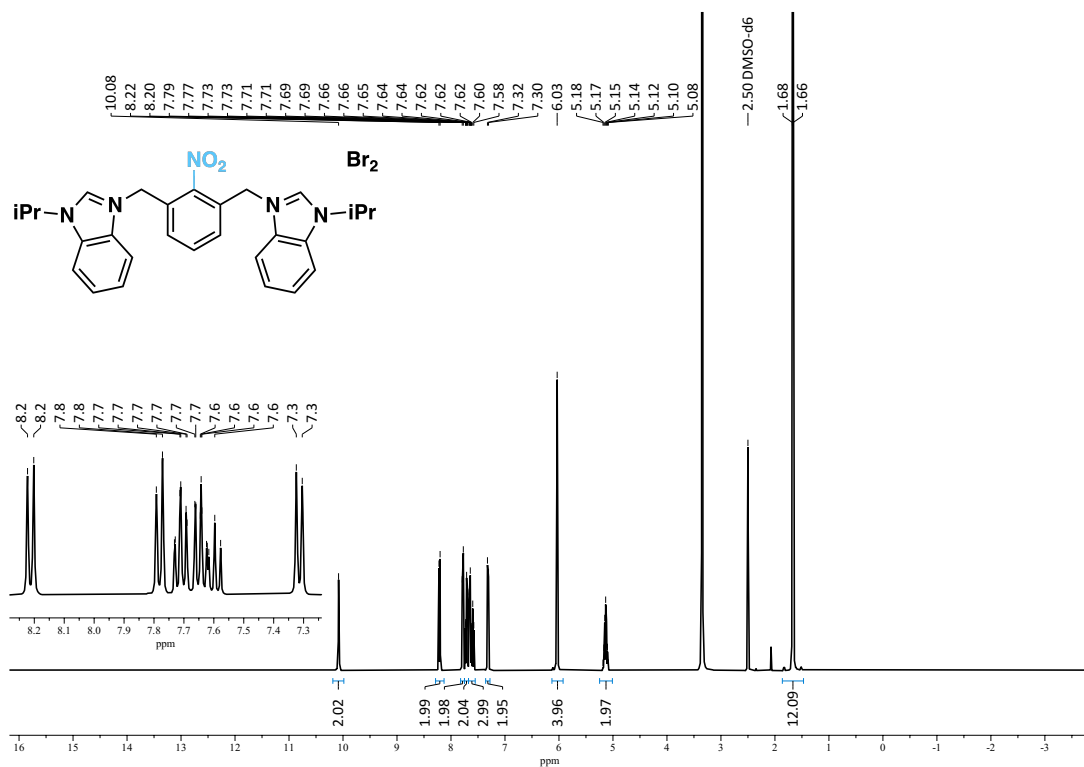

Figure S18. <sup>1</sup>H NMR (400 MHz, 298 K) of **3a** in DMSO-*d*<sub>6</sub>

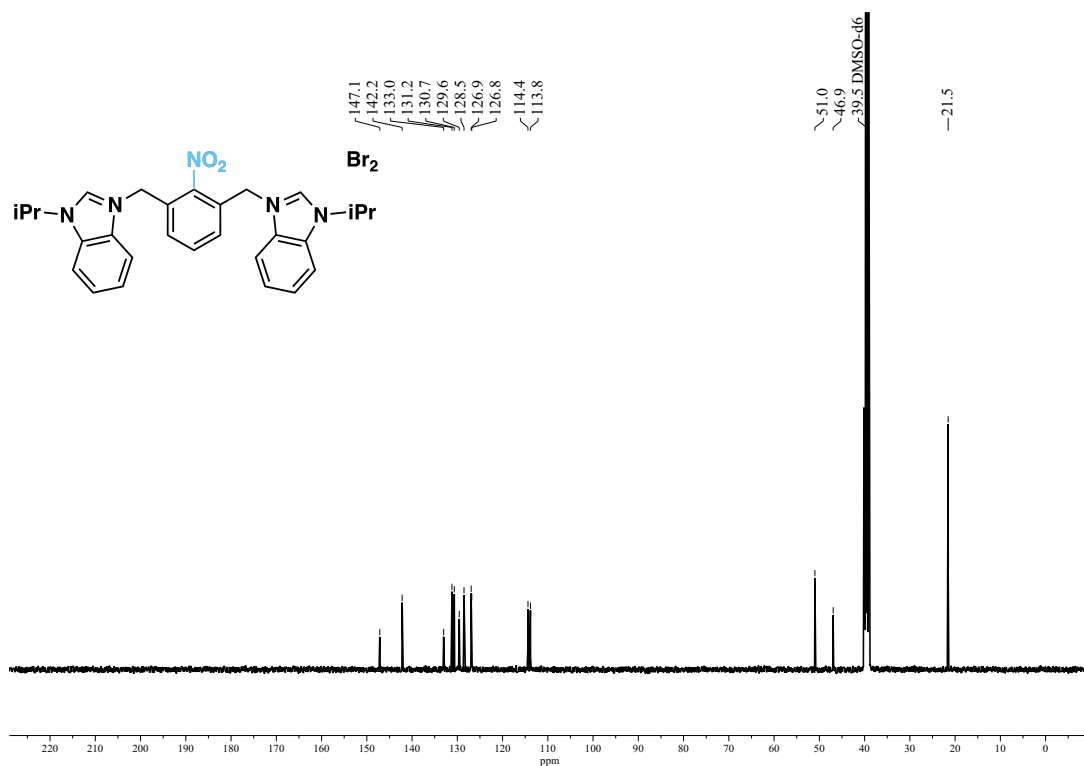

Figure S19. <sup>13</sup>C{<sup>1</sup>H} NMR (101 MHz, 298 K) of **3a** in DMSO-*d*<sub>6</sub>

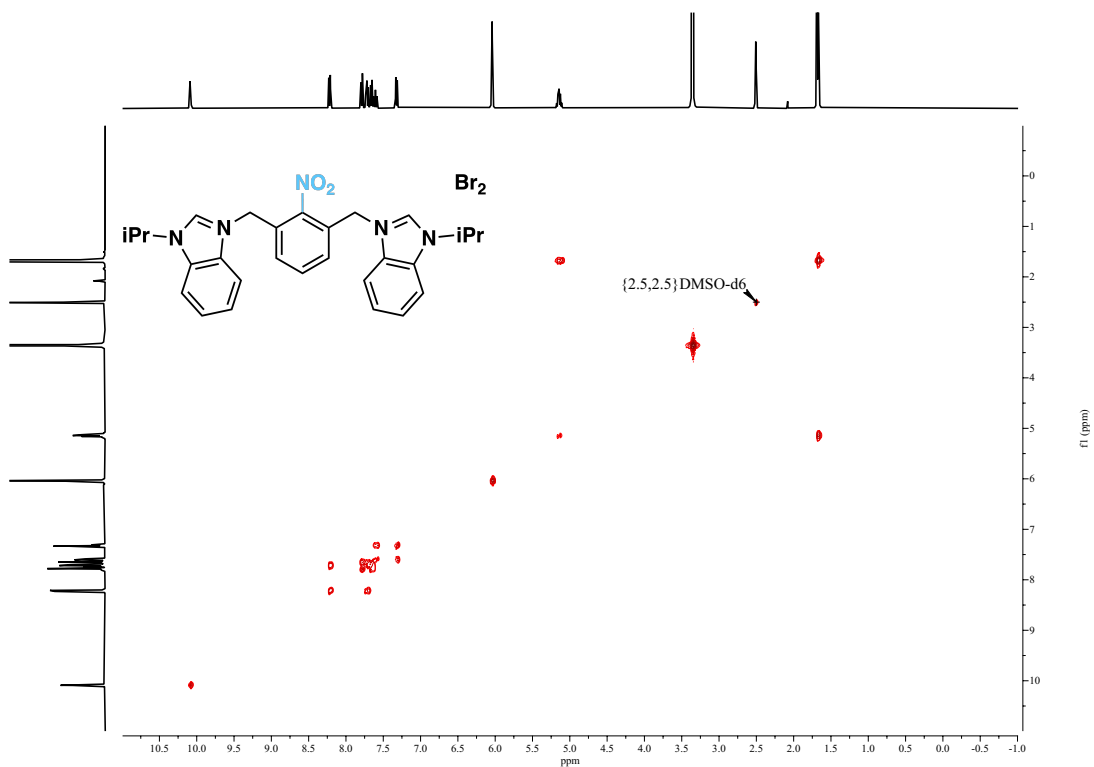

Figure S20.  $^1\text{H}, ^1\text{H}$  COSY NMR (400MHz, 298K) of **3a** in  $\text{DMSO}-d_6$

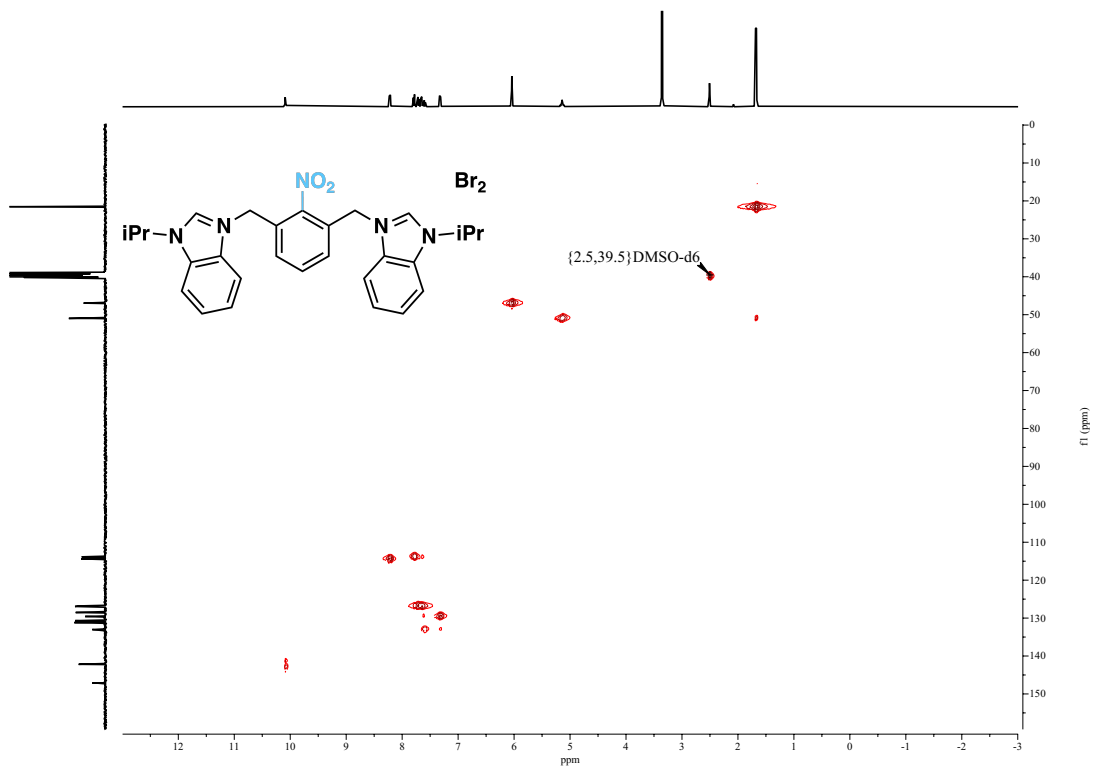

Figure S21.  $^1\text{H}, ^{13}\text{C}$  HSQC NMR (400MHz, 298K) of **3a** in  $\text{DMSO}-d_6$

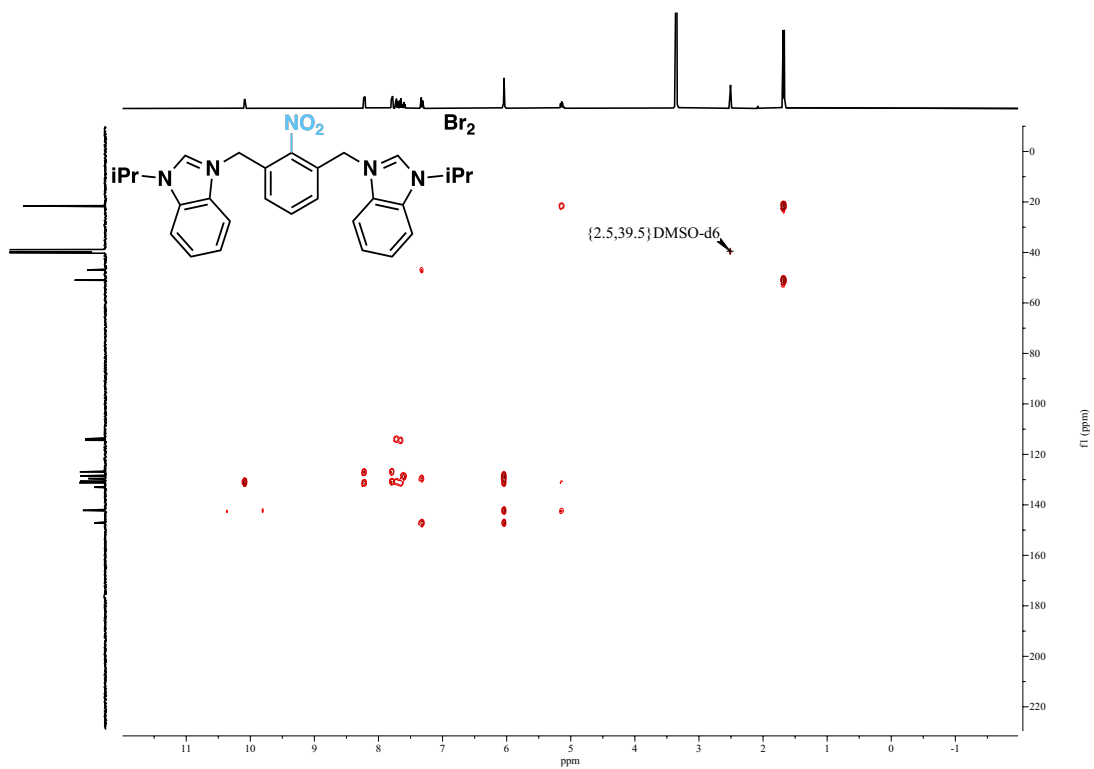

### 7.3 NMR spectra of compound **3b**

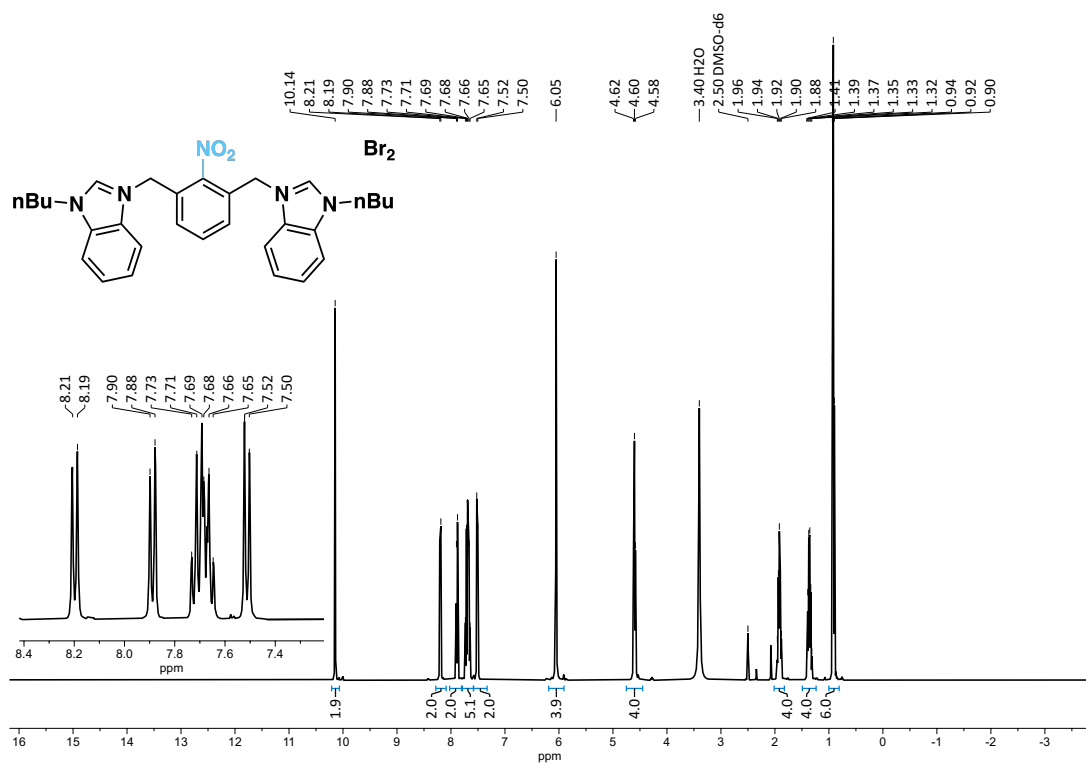

Figure S23. <sup>1</sup>H NMR (400MHz, 298K) of **3b** in DMSO-*d*<sub>6</sub>

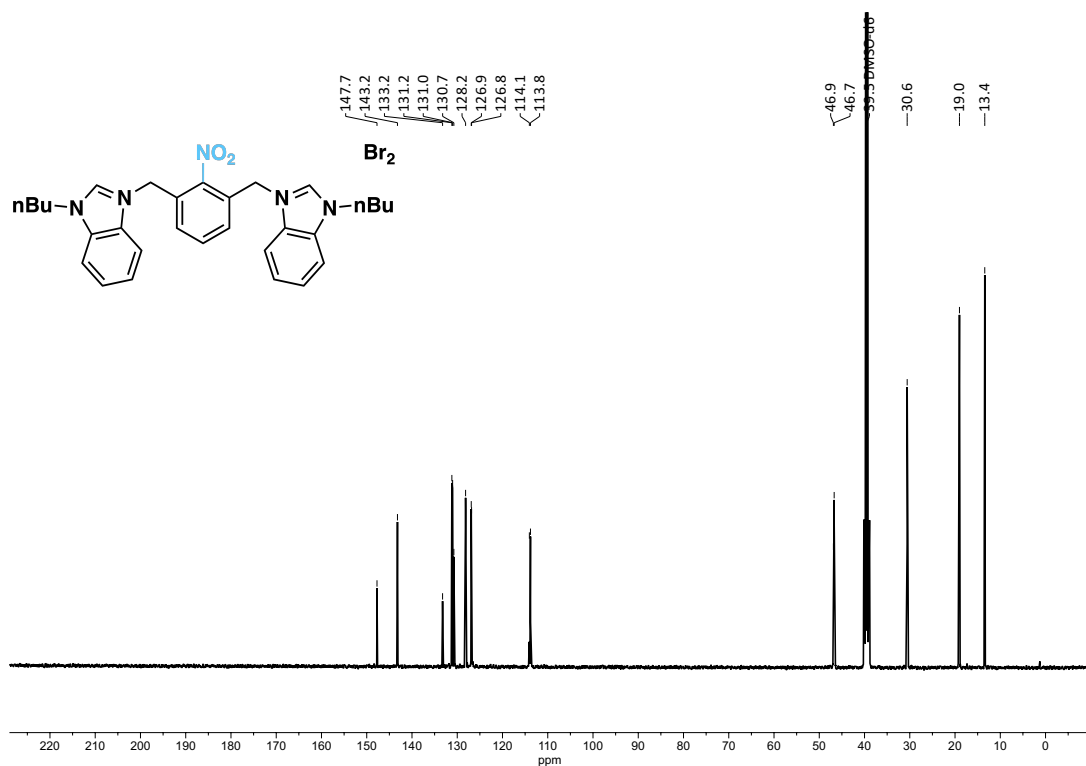

Figure S24. <sup>13</sup>C{<sup>1</sup>H} NMR (101MHz, 298K) of **3b** in DMSO-*d*<sub>6</sub>

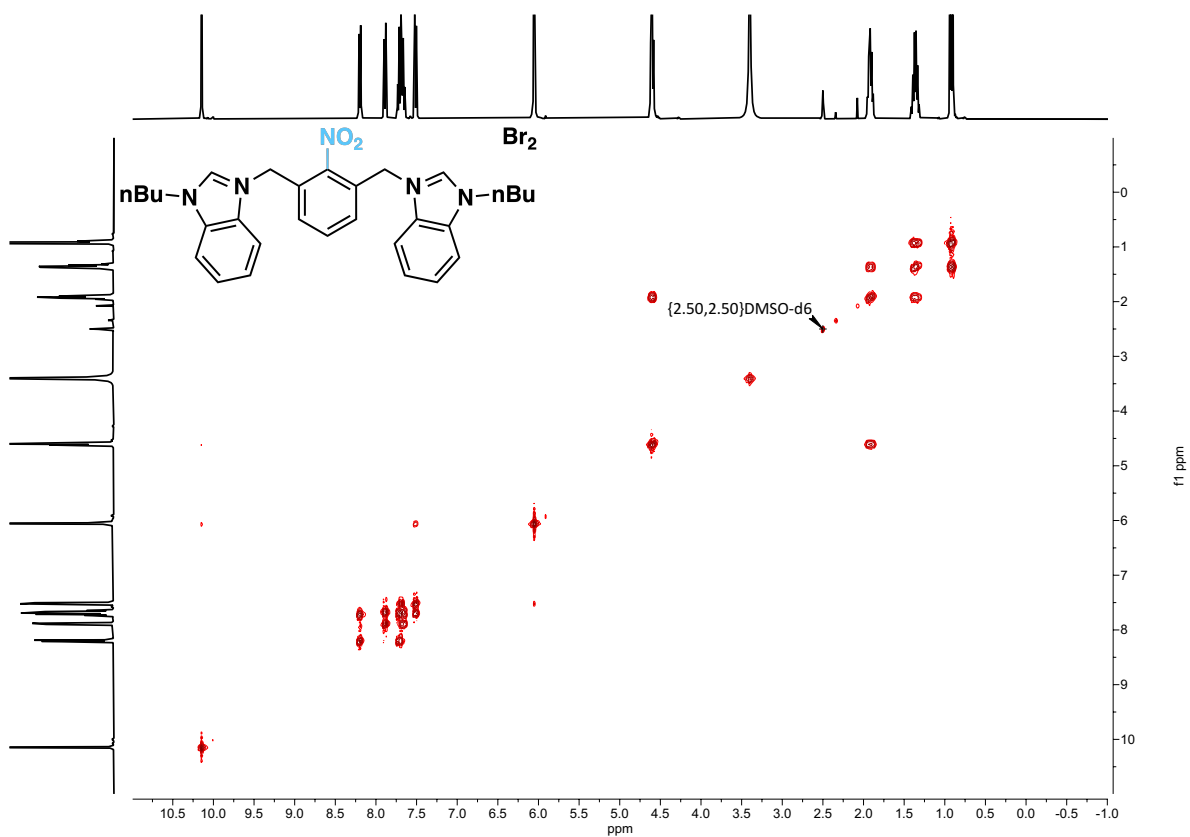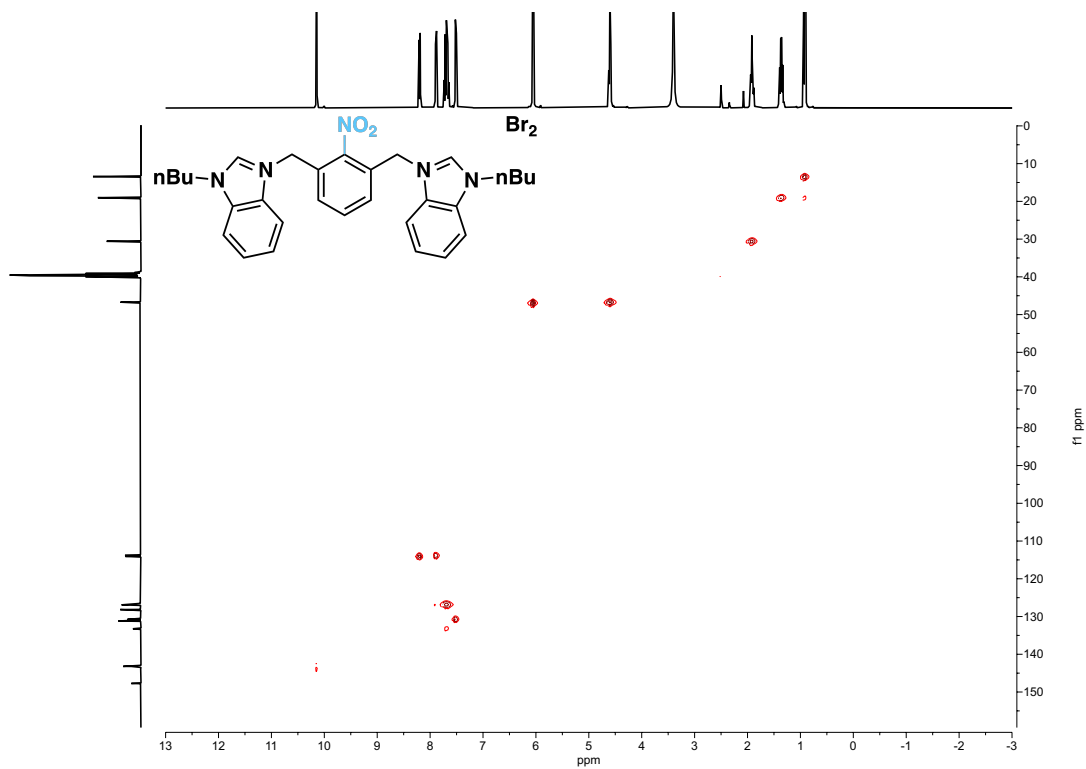



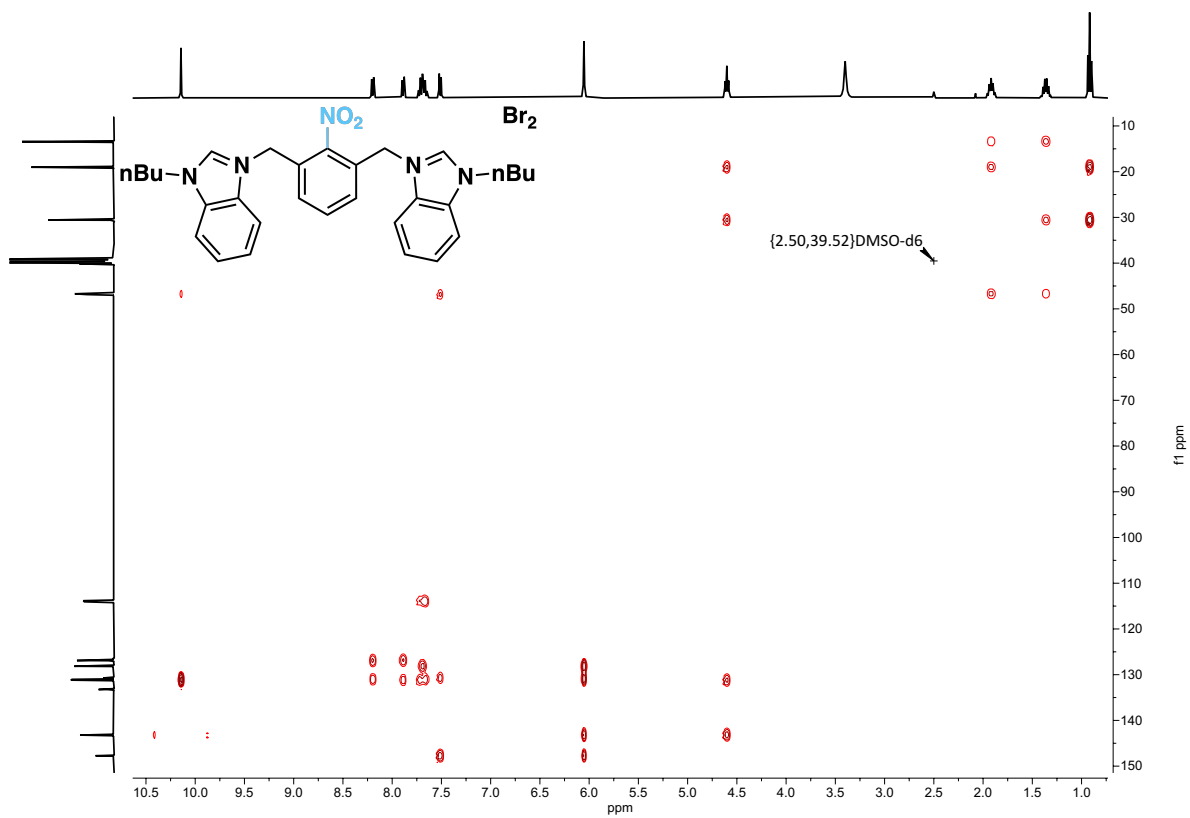

## 7.4 NMR spectra of compound 4a

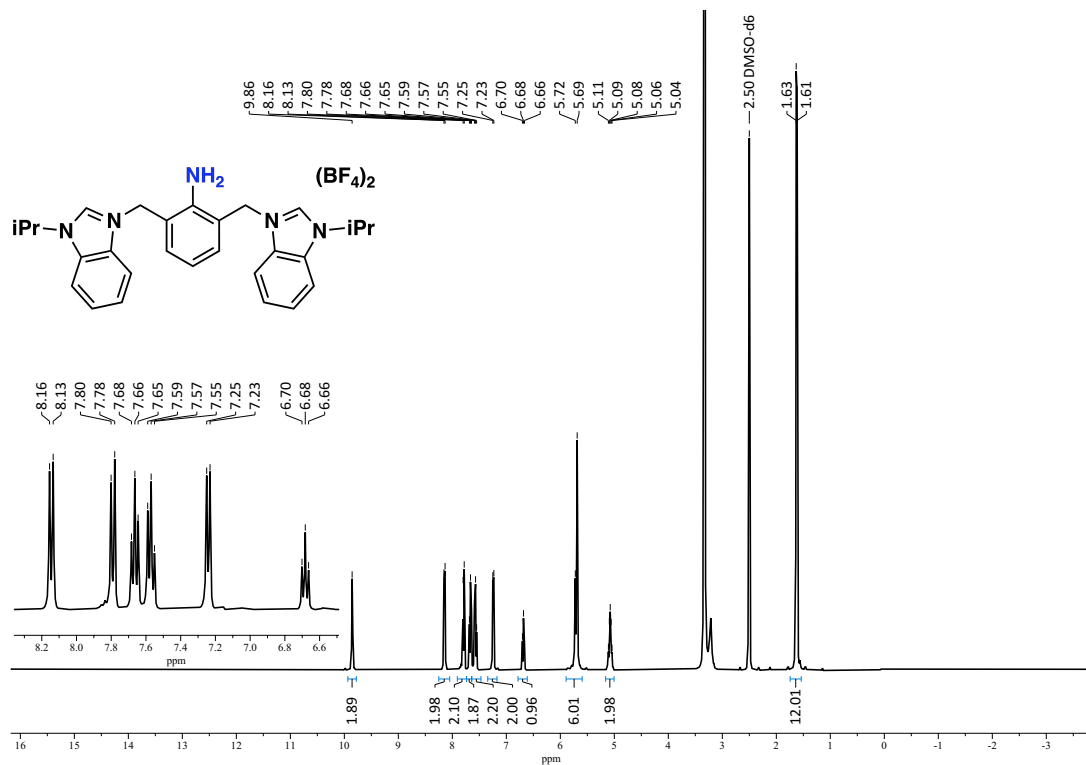

Figure S28. <sup>1</sup>H NMR (400MHz, 298K) of 4a in DMSO-d<sub>6</sub>

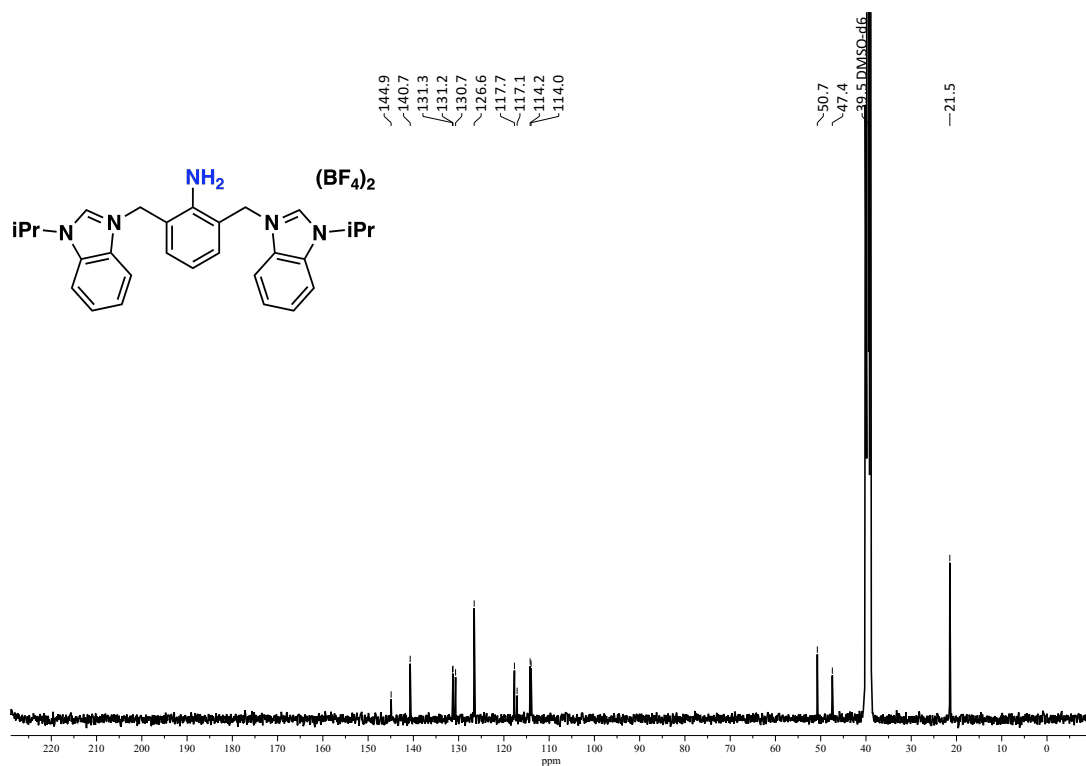

Figure S29. <sup>13</sup>C{<sup>1</sup>H} NMR (101MHz, 298K) of 4a in DMSO-d<sub>6</sub>

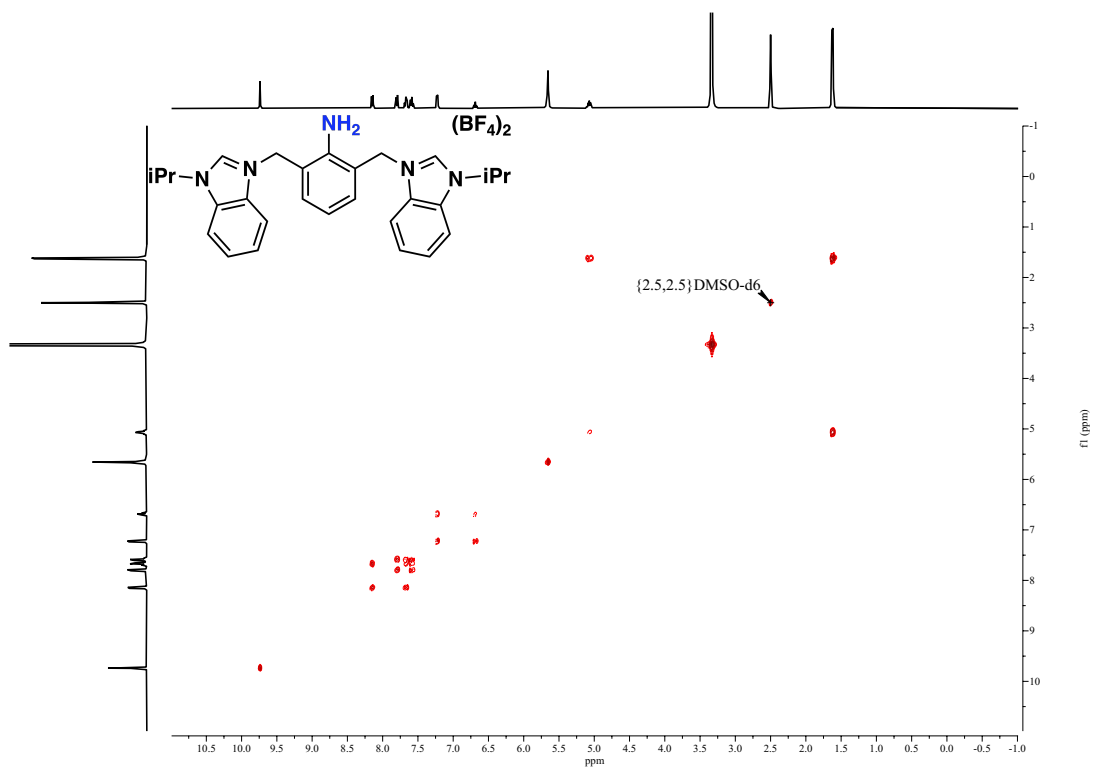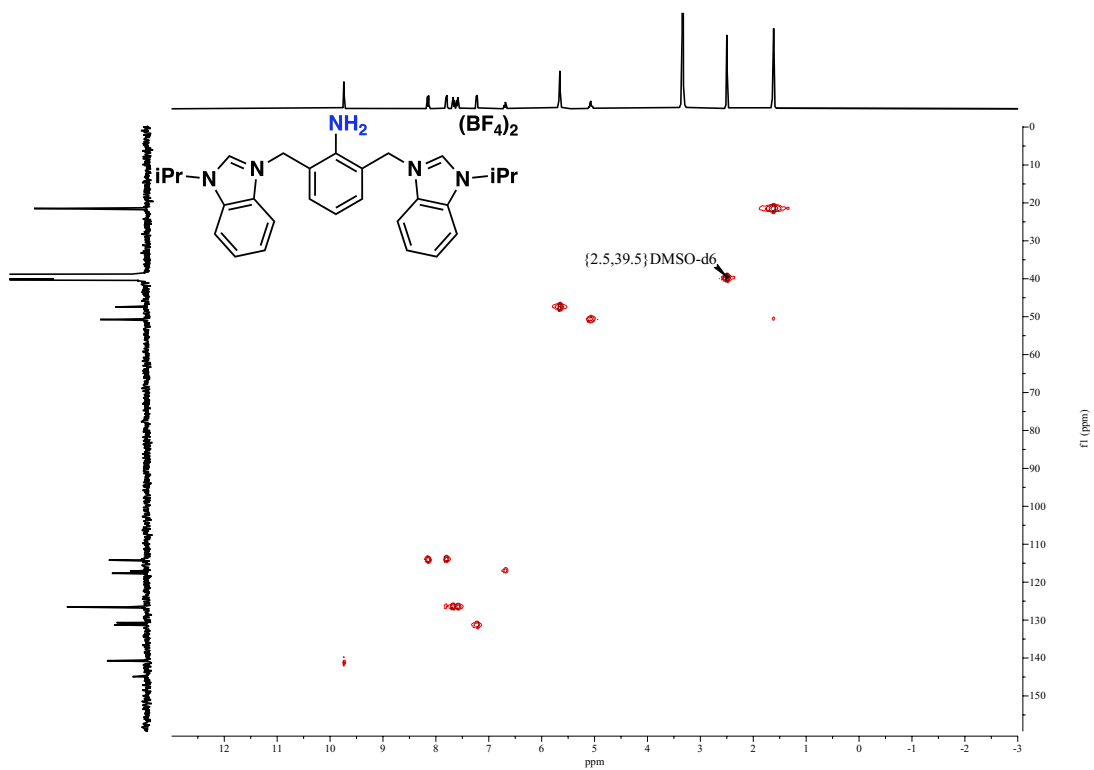

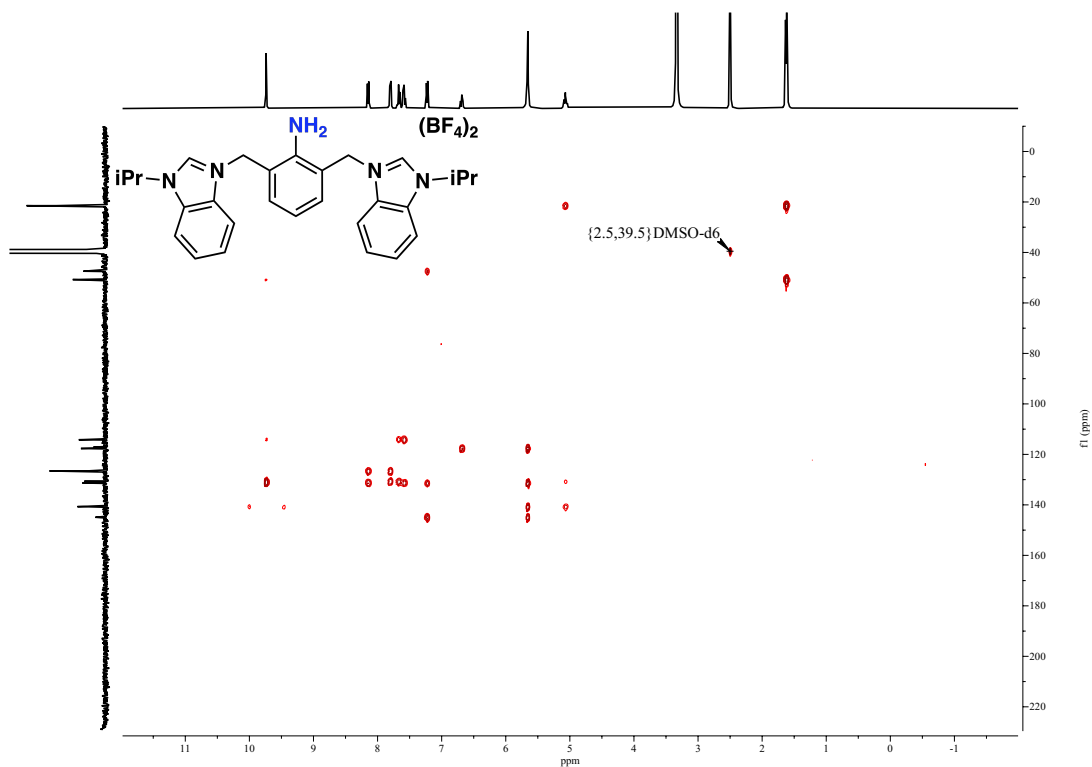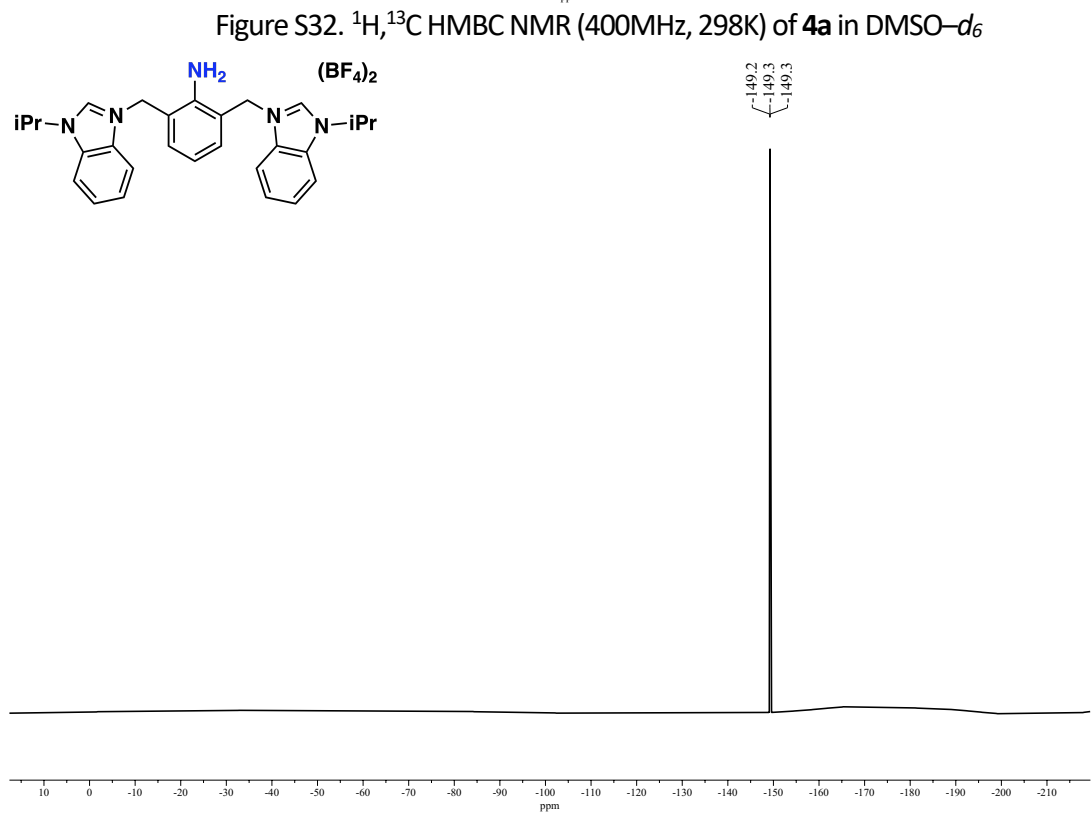

## 7.5 NMR spectra of compound 4b

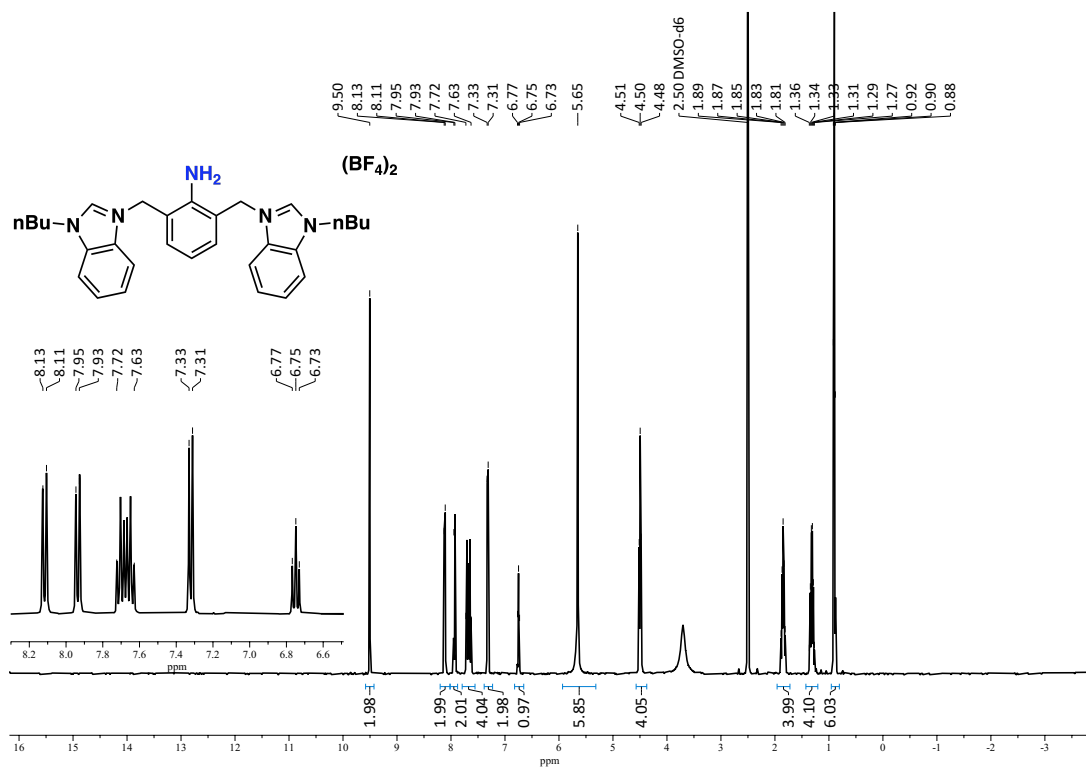

Figure S34. <sup>1</sup>H NMR (400MHz, 298K) of **4b** in DMSO-*d*<sub>6</sub>

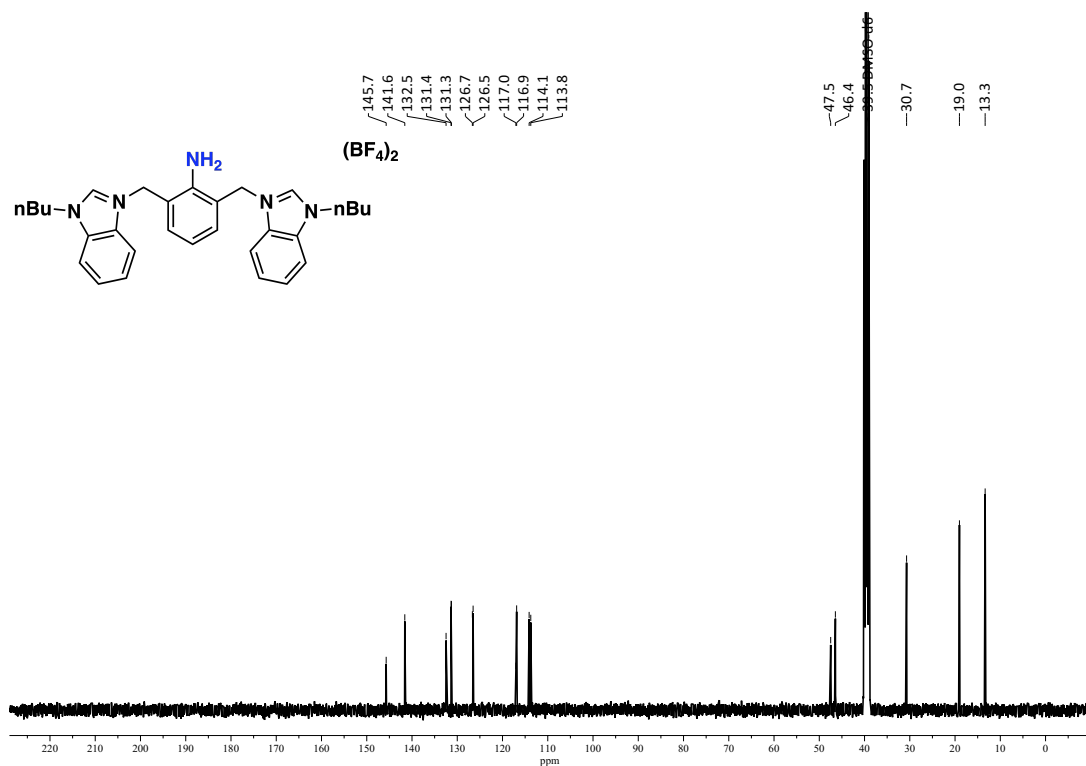

Figure S35. <sup>13</sup>C{<sup>1</sup>H} NMR (101MHz, 298K) of **4b** in DMSO-*d*<sub>6</sub>

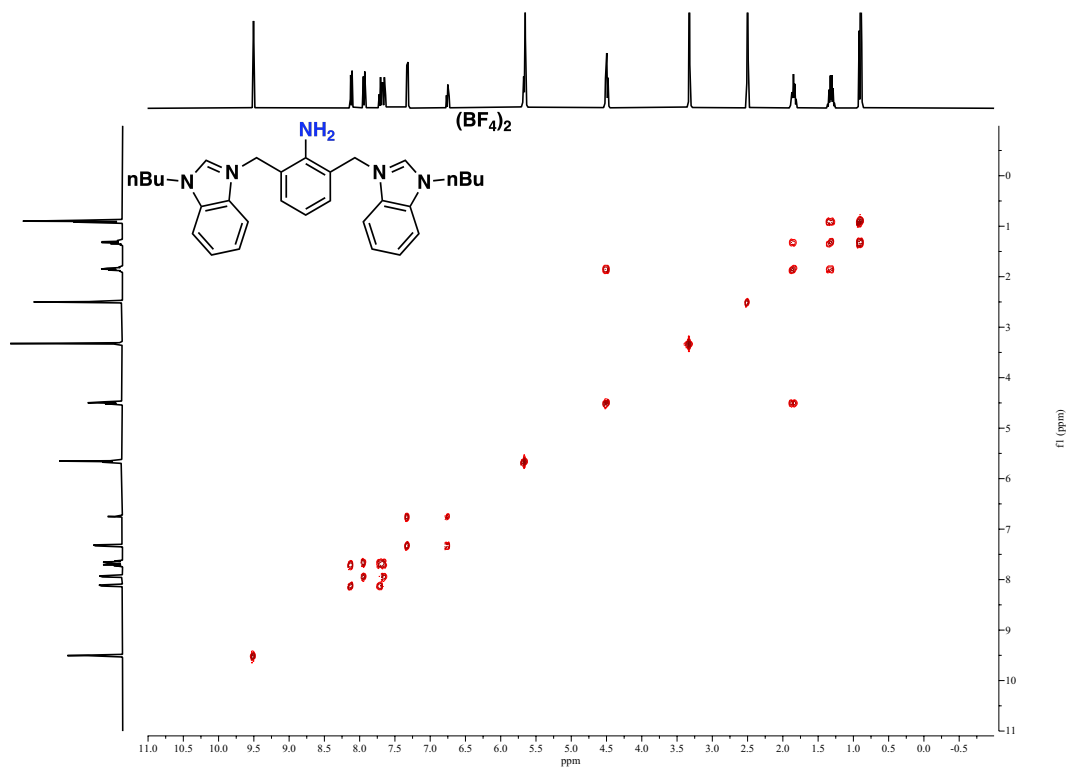

Figure S36.  $^1\text{H}, ^1\text{H}$  COSY NMR (400MHz, 298K) of **4b** in  $\text{DMSO}-d_6$

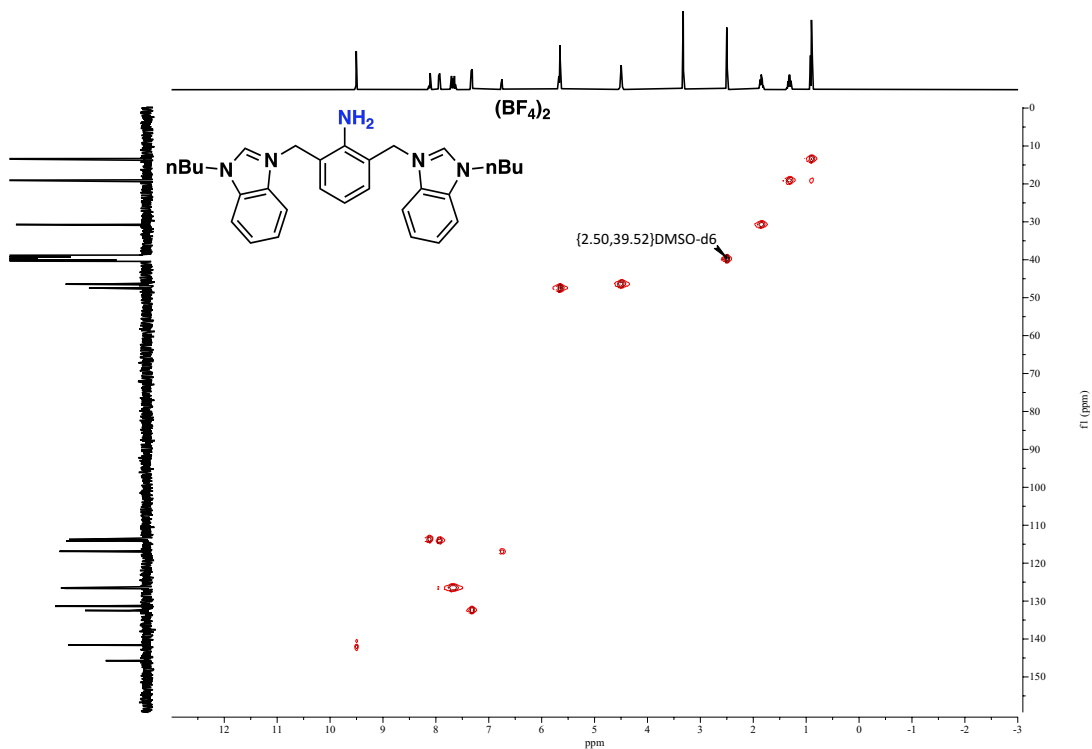

Figure S37.  $^1\text{H}, ^{13}\text{C}$  HSQC NMR (400MHz, 298K) of **4b** in  $\text{DMSO}-d_6$

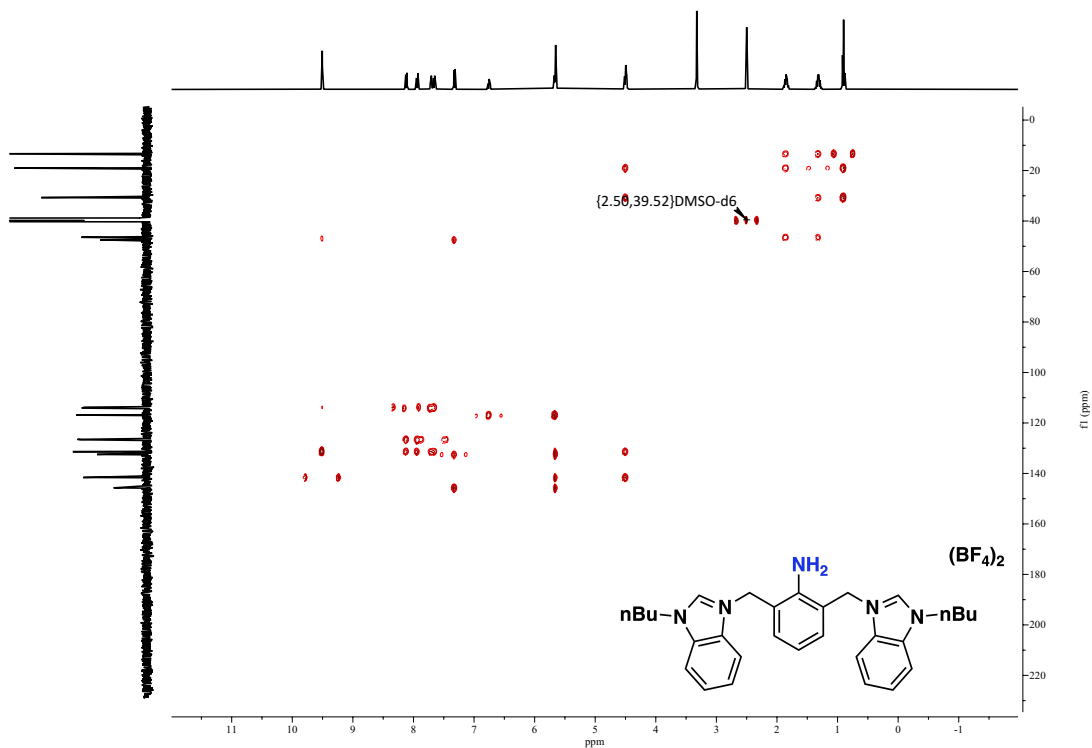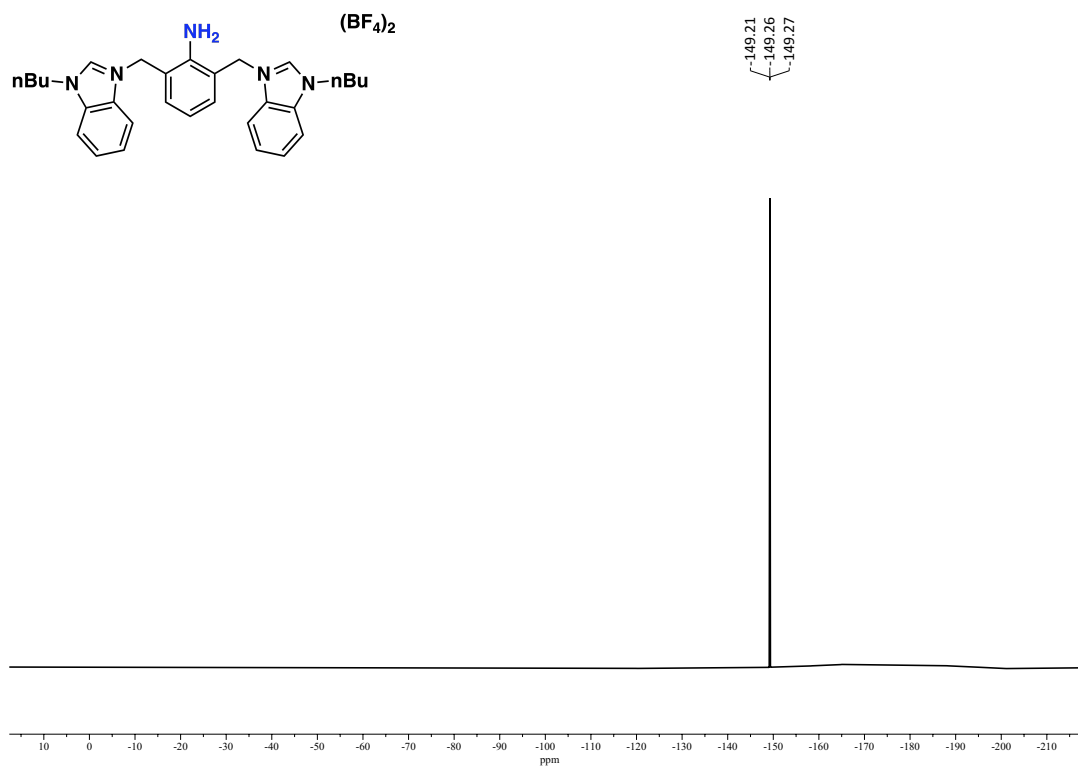

## 7.6 NMR spectra of compound 5a

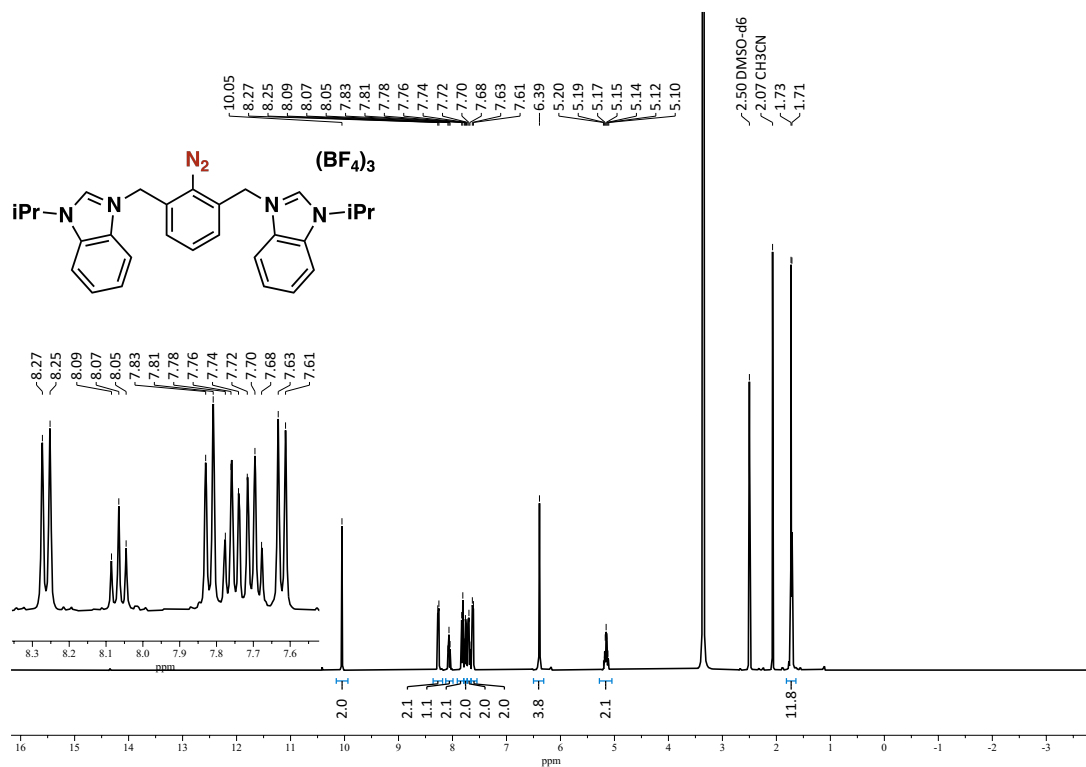

Figure S40.  $^1\text{H}$  NMR (400MHz, 298K) of 5a in  $\text{DMSO}-d_6$

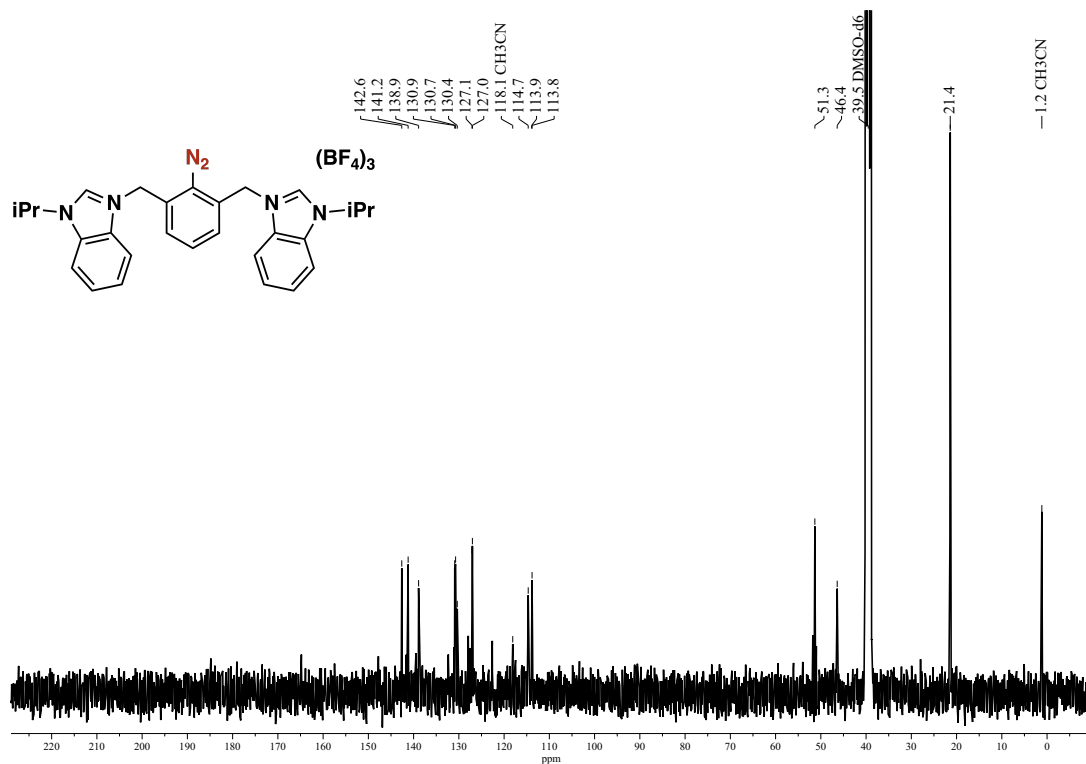

Figure S41.  $^{13}\text{C}\{^1\text{H}\}$  NMR (101MHz, 298K) of 5a in  $\text{DMSO}-d_6$



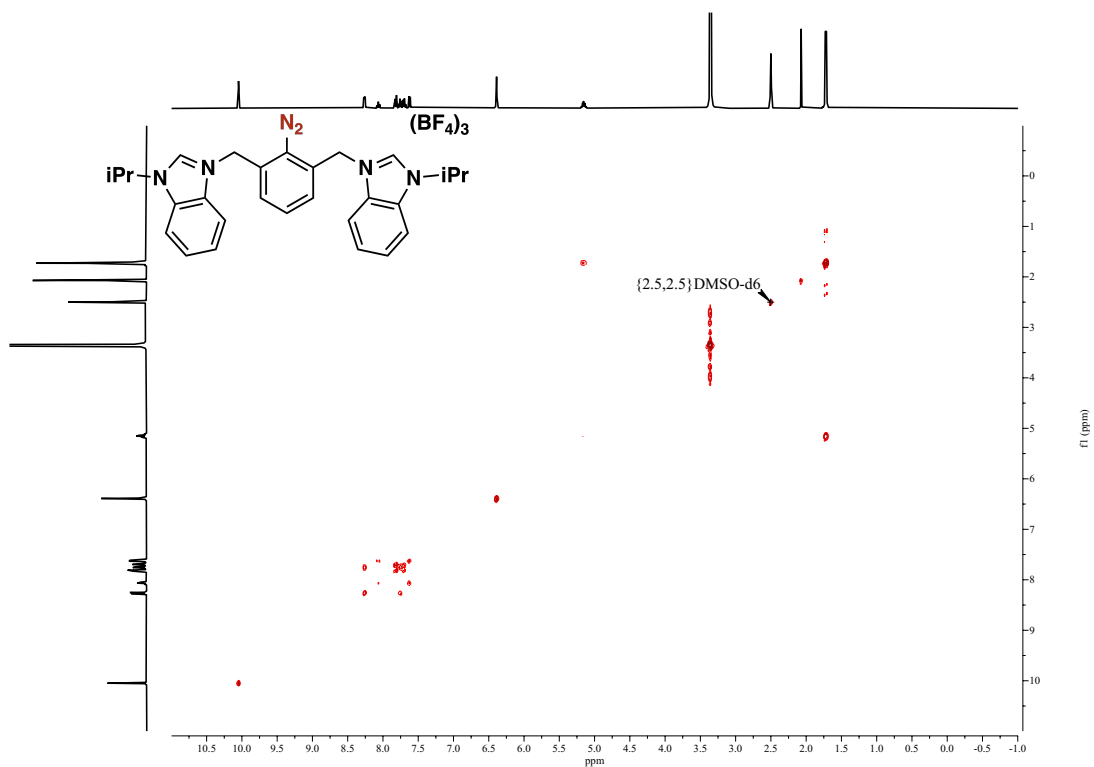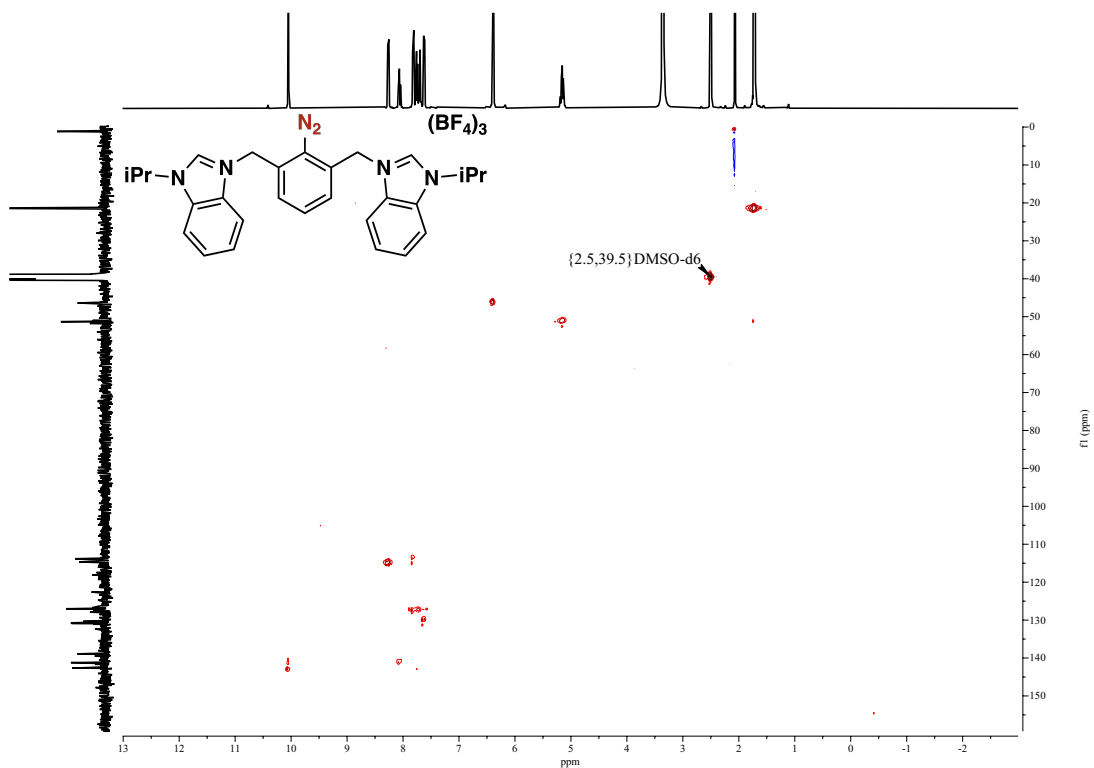

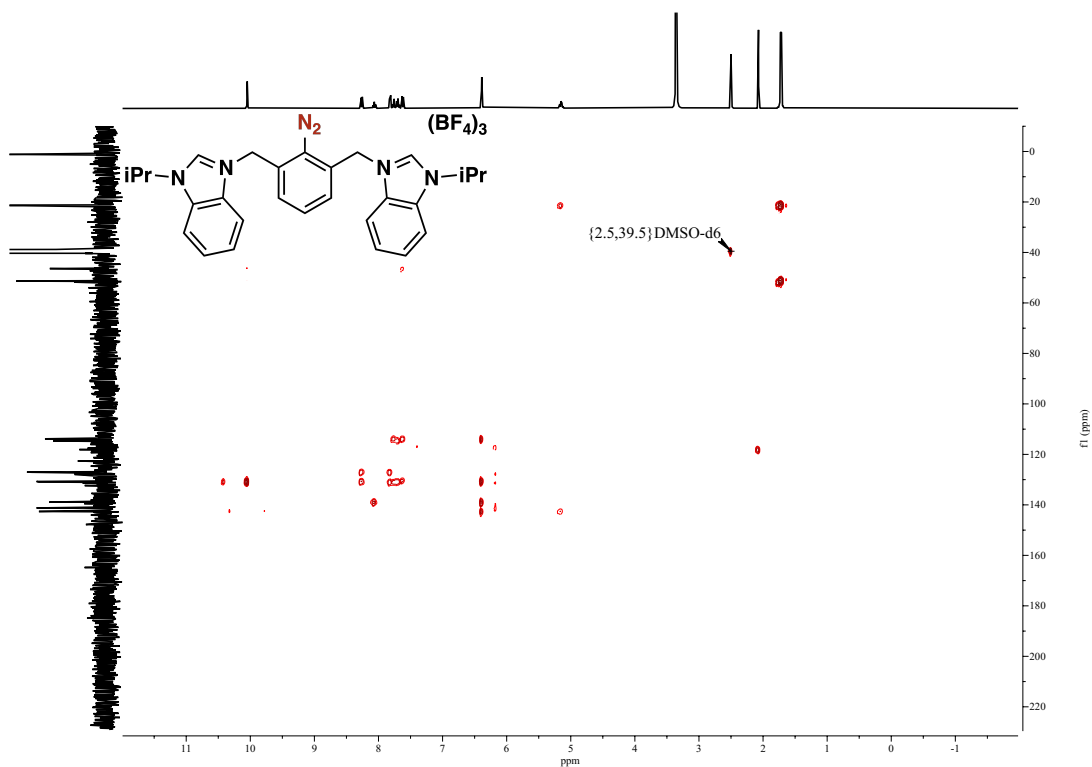

Figure S44.  $^1\text{H},^{13}\text{C}$  HMBC NMR (400MHz, 298K) of **5a** in DMSO- $d_6$

## 7.7 NMR spectra of compound 5b

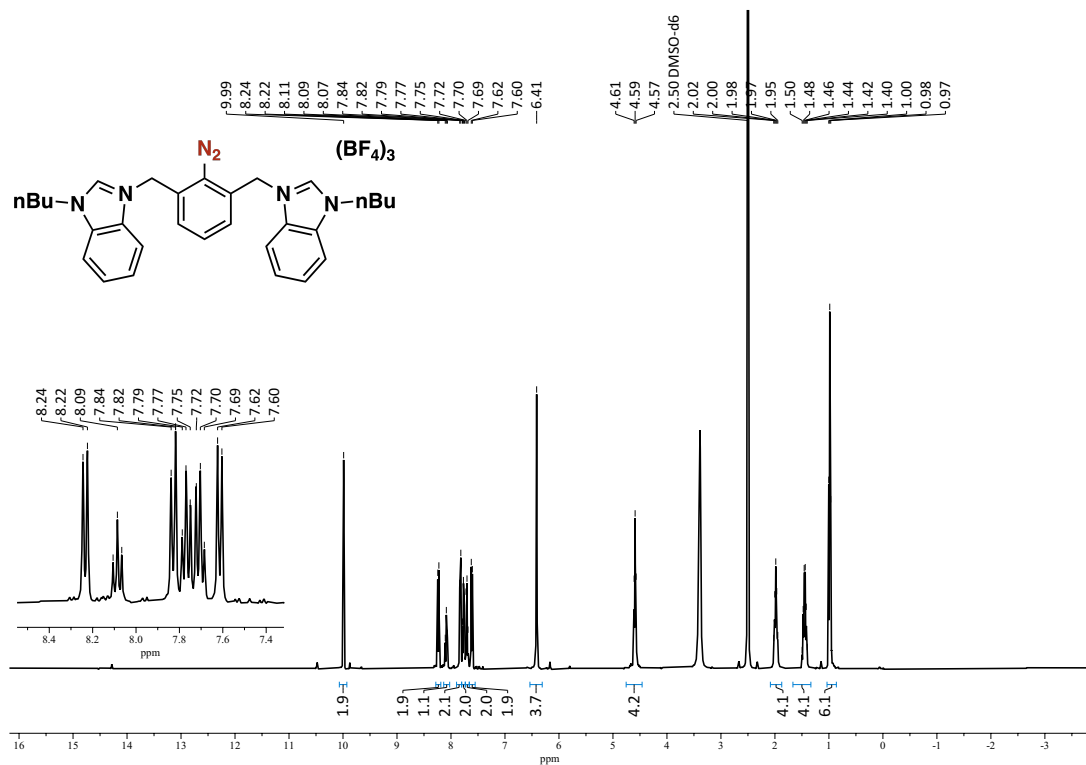

Figure S45.  $^1H$  NMR (400MHz, 298K) of **5b** in  $DMSO-d_6$

## 7.8 NMR spectra of complex 6a

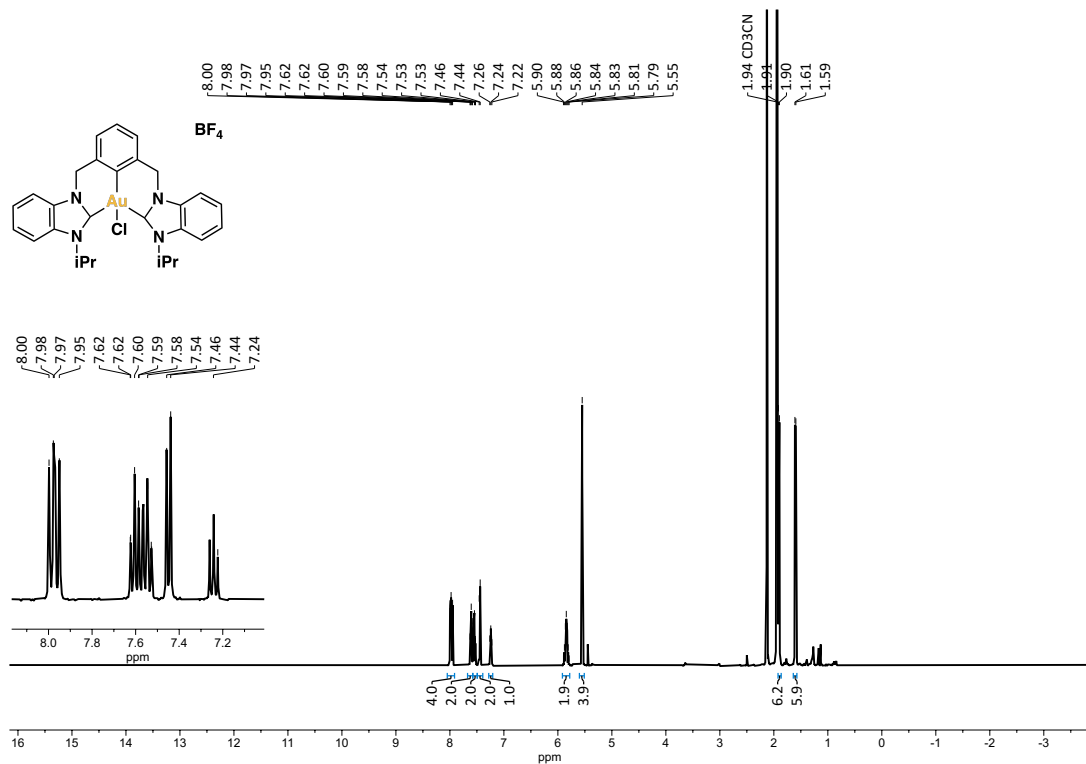

Figure S46.  $^1H$  NMR (400MHz, 298K) of **6a** in  $CD_3CN$

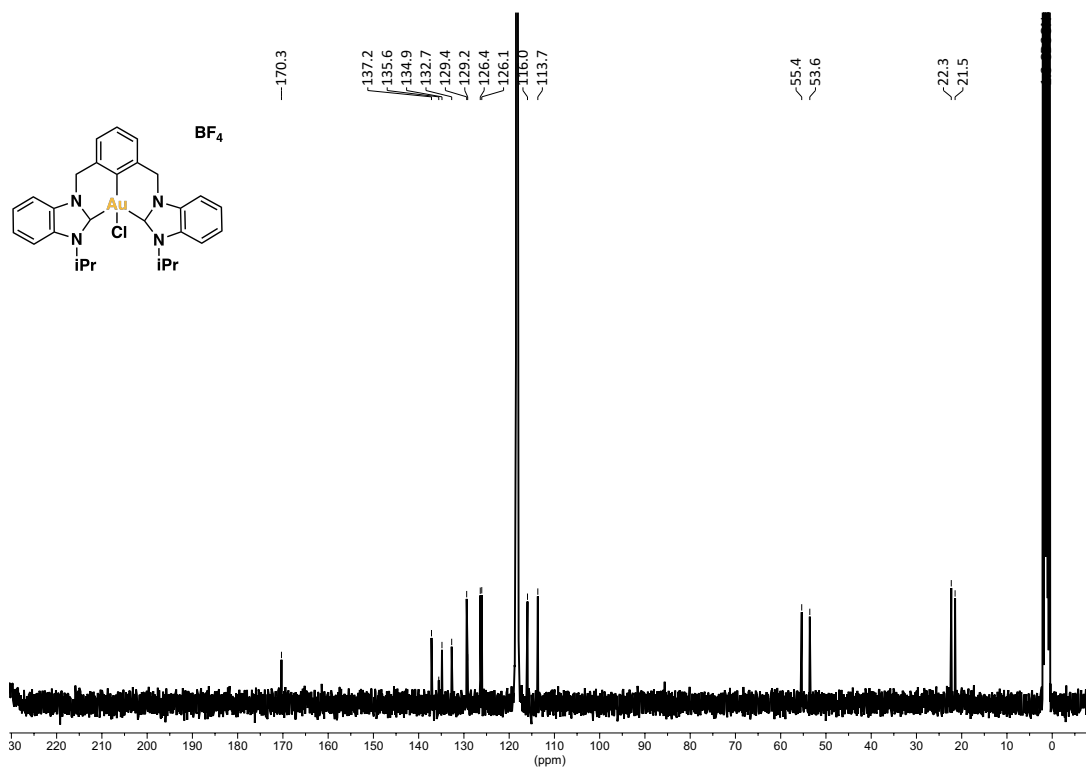

Figure S47.  $^{13}\text{C}\{^1\text{H}\}$  NMR (101 MHz, 298 K) of **6a** in  $\text{CD}_3\text{CN}$

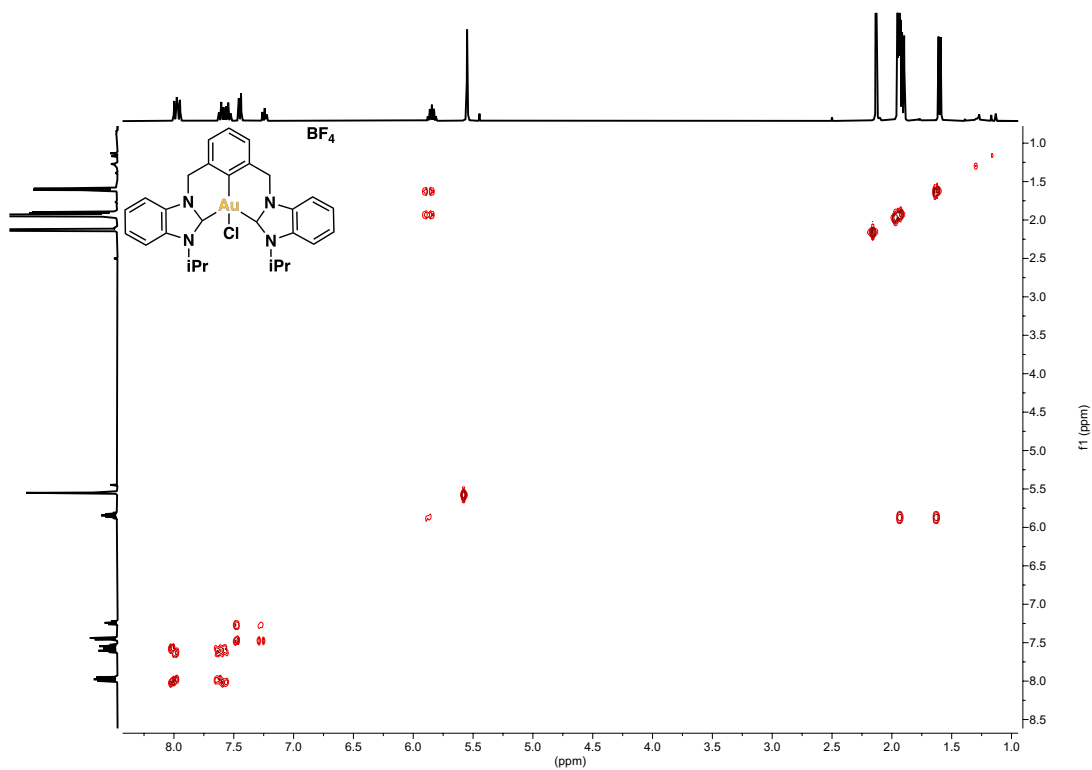

Figure S48.  $^1\text{H},^1\text{H}$  COSY NMR (400 MHz, 298 K) of **6a** in  $\text{CD}_3\text{CN}$

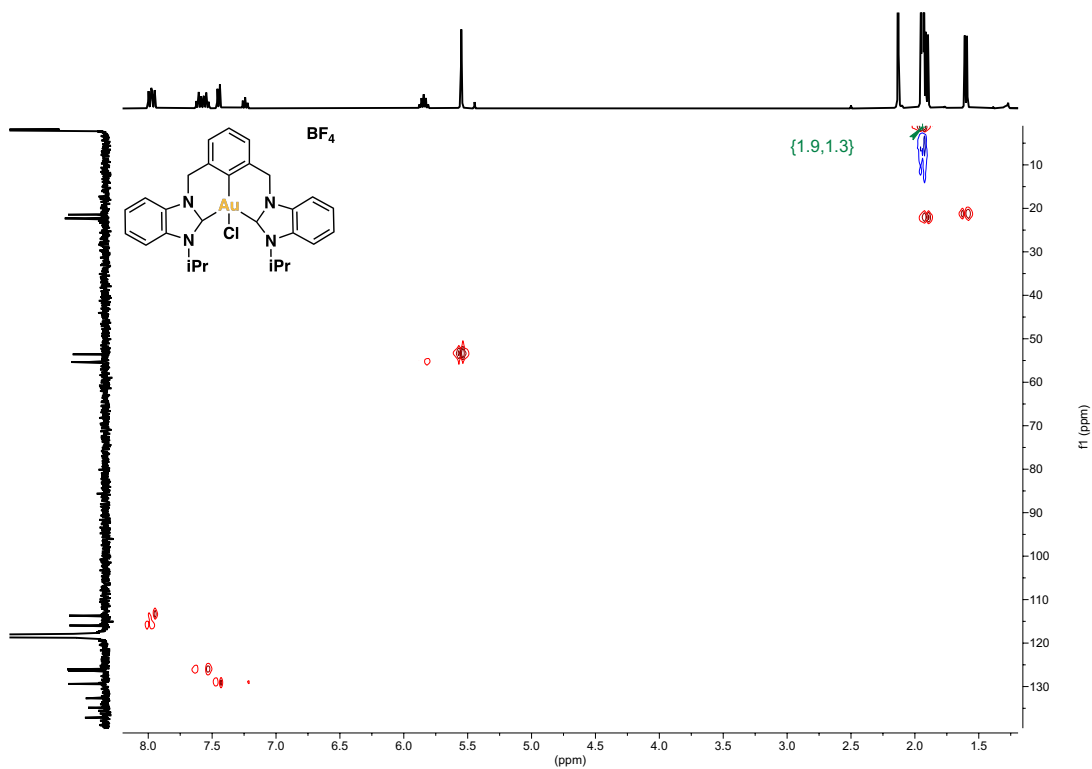

Figure S49.  $^1\text{H}$ ,  $^{13}\text{C}$  HSQC NMR (400MHz, 298K) of **6a** in  $\text{CD}_3\text{CN}$

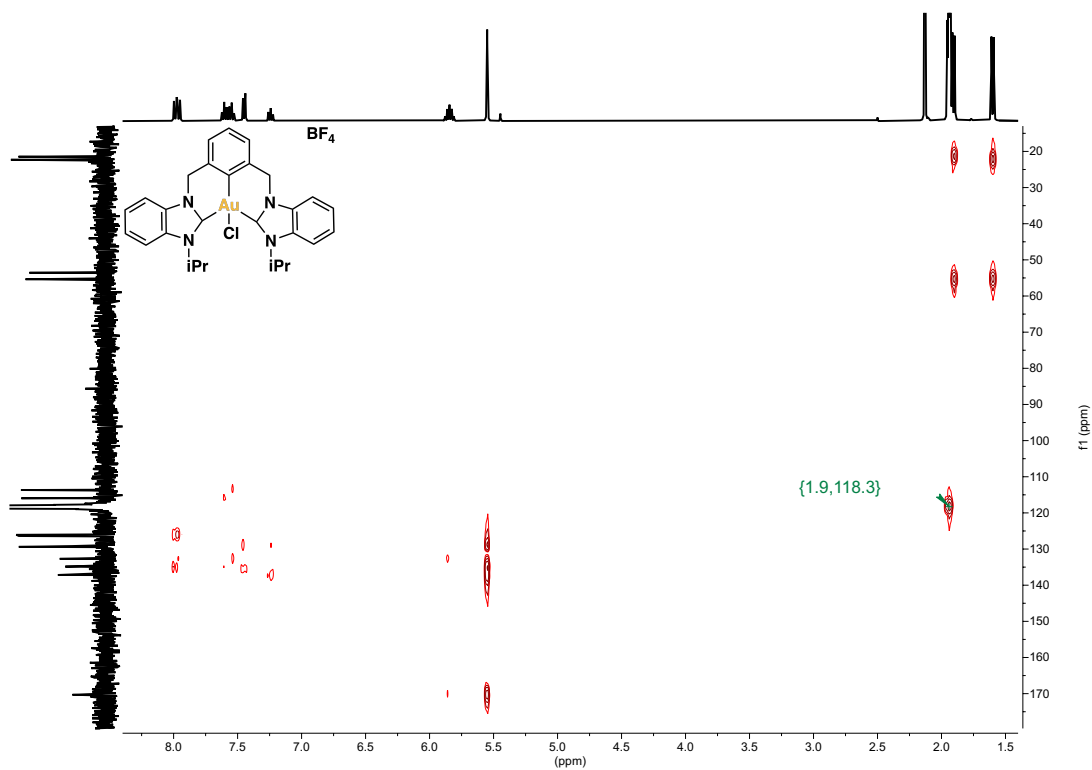

Figure S50.  $^1\text{H}$ ,  $^{13}\text{C}$  HMBC NMR (400MHz, 298K) of **6a** in  $\text{CD}_3\text{CN}$

### 7.9 NMR spectra of complex 6b

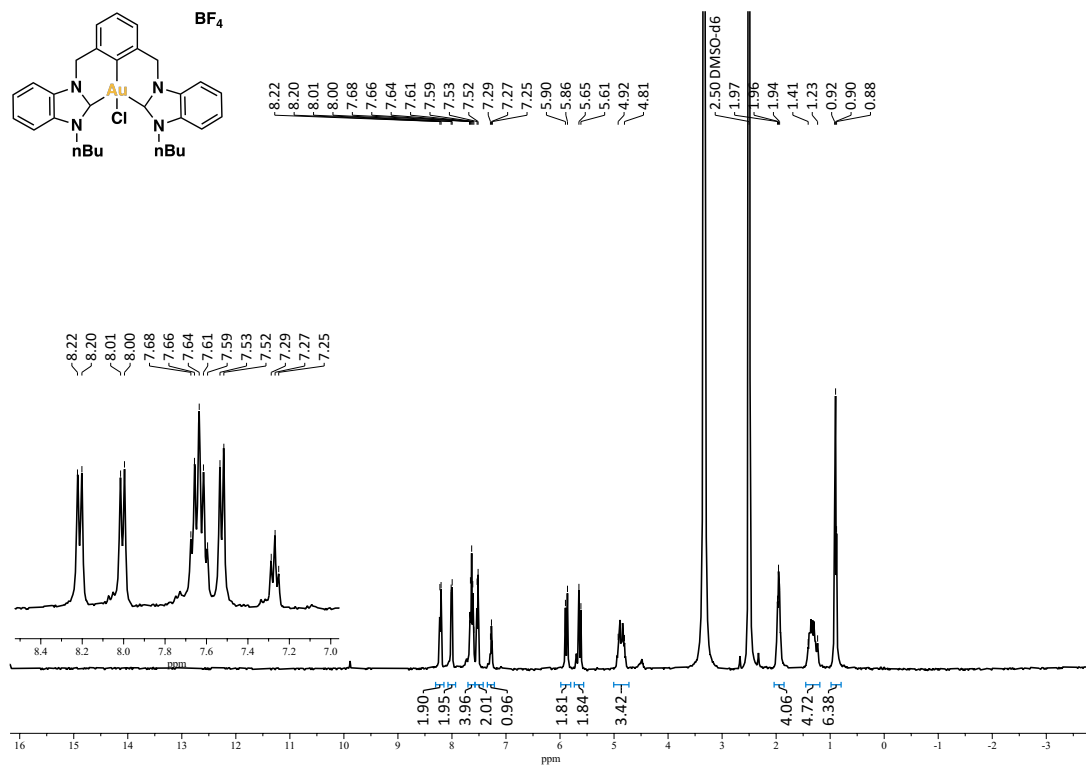

Figure S51. <sup>1</sup>H NMR (400 MHz, 298 K) of **6b** in DMSO-d<sub>6</sub>

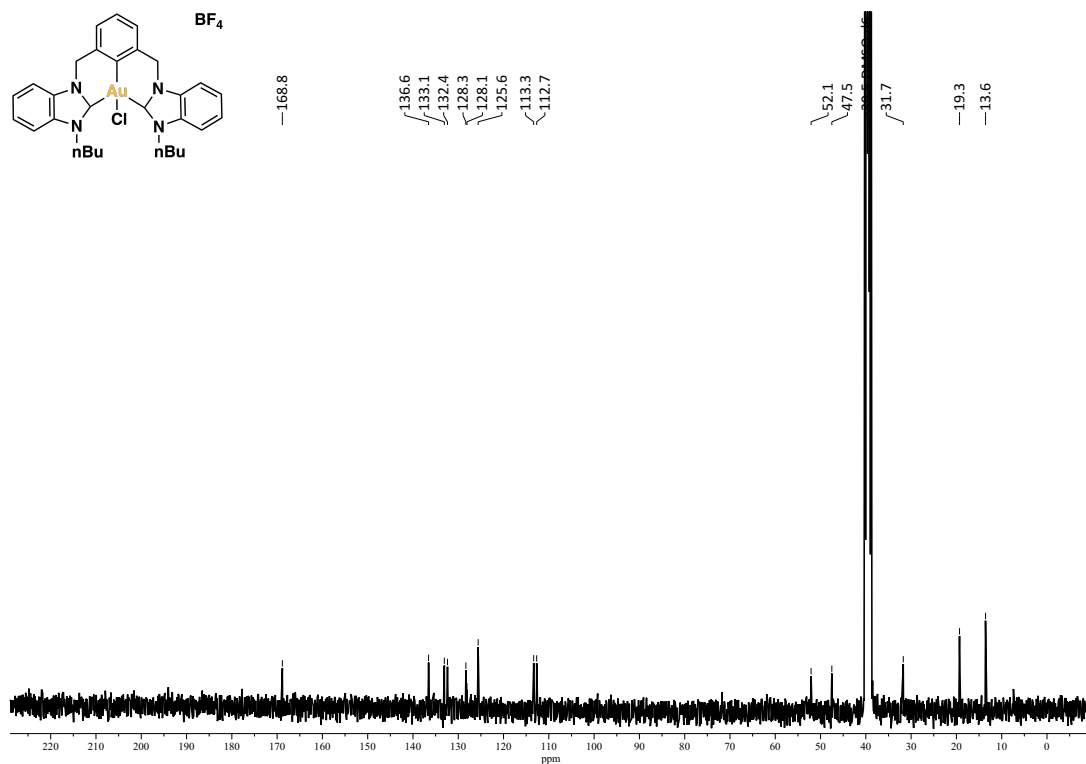

Figure S52. <sup>13</sup>C{<sup>1</sup>H} NMR (101 MHz, 298 K) of **6b** in DMSO-d<sub>6</sub>

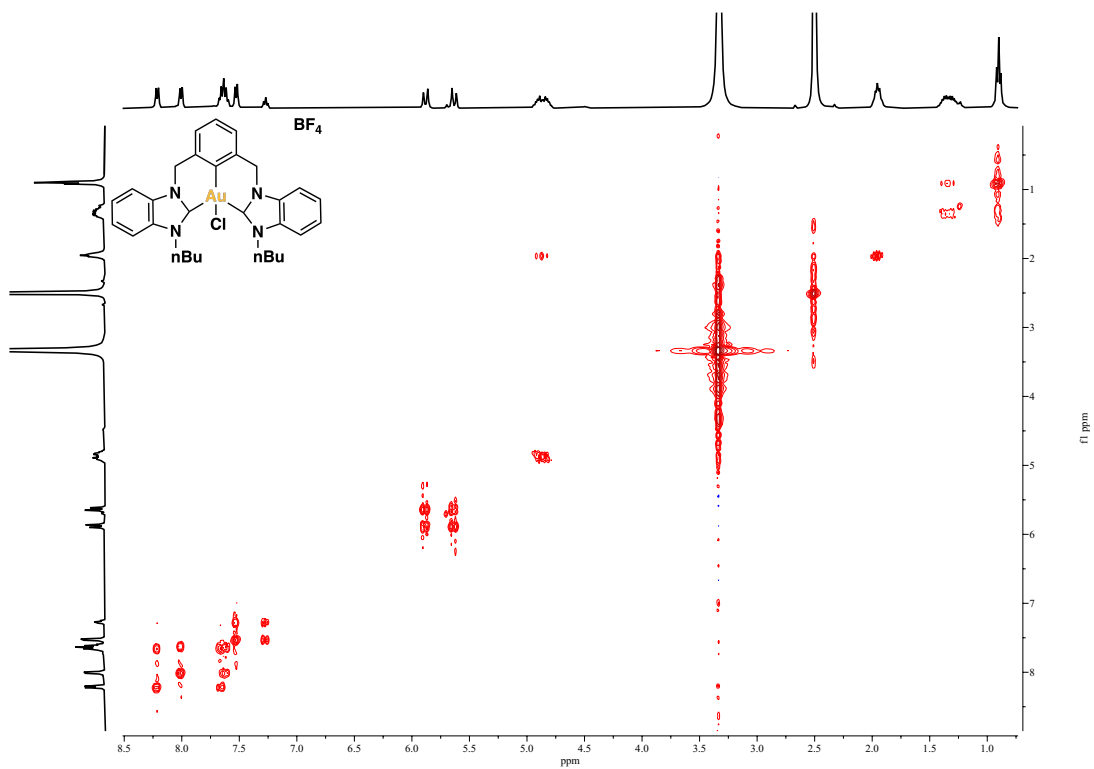

Figure S53.  $^1\text{H}, ^1\text{H}$  COSY NMR (400MHz, 298K) of **6b** in  $\text{DMSO}-d_6$

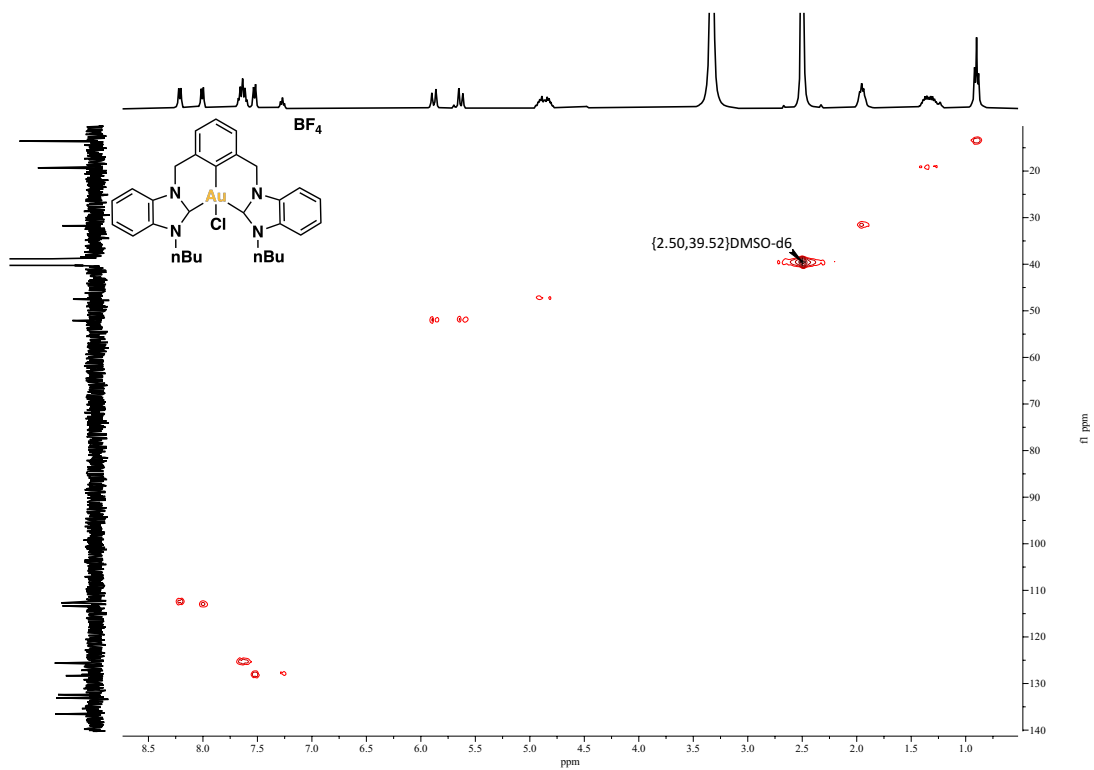

Figure S54.  $^1\text{H}, ^{13}\text{C}$  HSQC NMR (400MHz, 298K) of **6b** in  $\text{DMSO}-d_6$

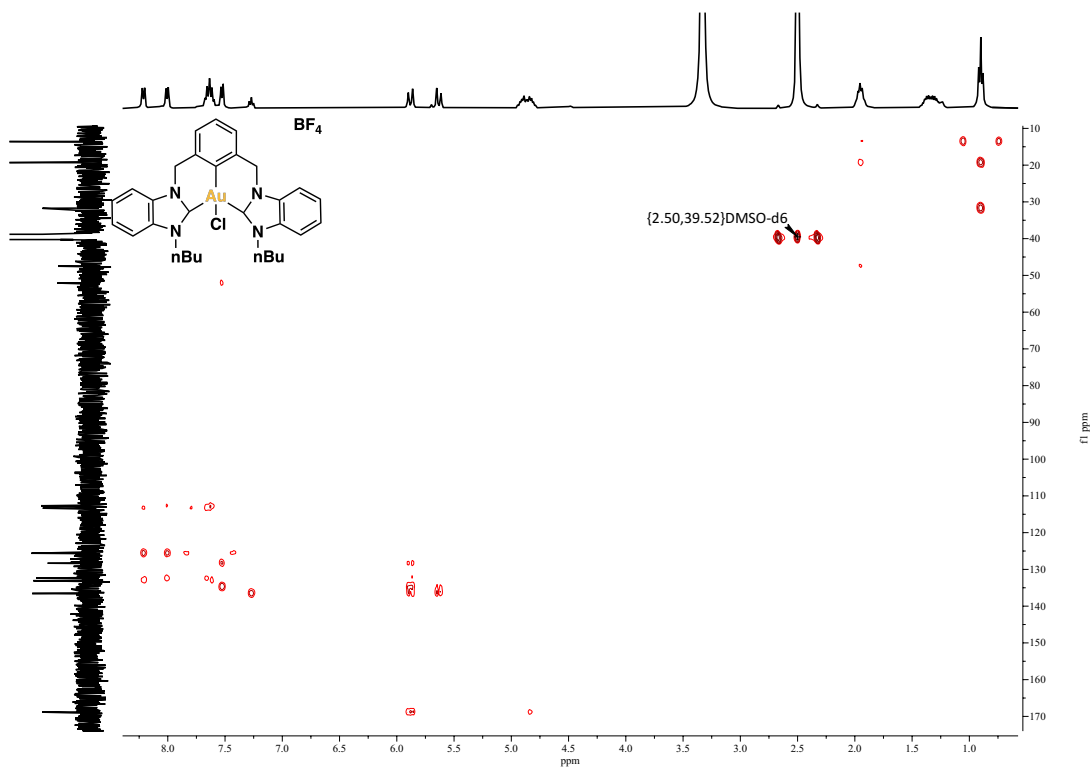

Figure S55.  $^1\text{H},^{13}\text{C}$  HMBC NMR (400MHz, 298K) of **6b** in  $\text{DMSO-d}_6$



## 7.10 NMR spectra of complex 8a

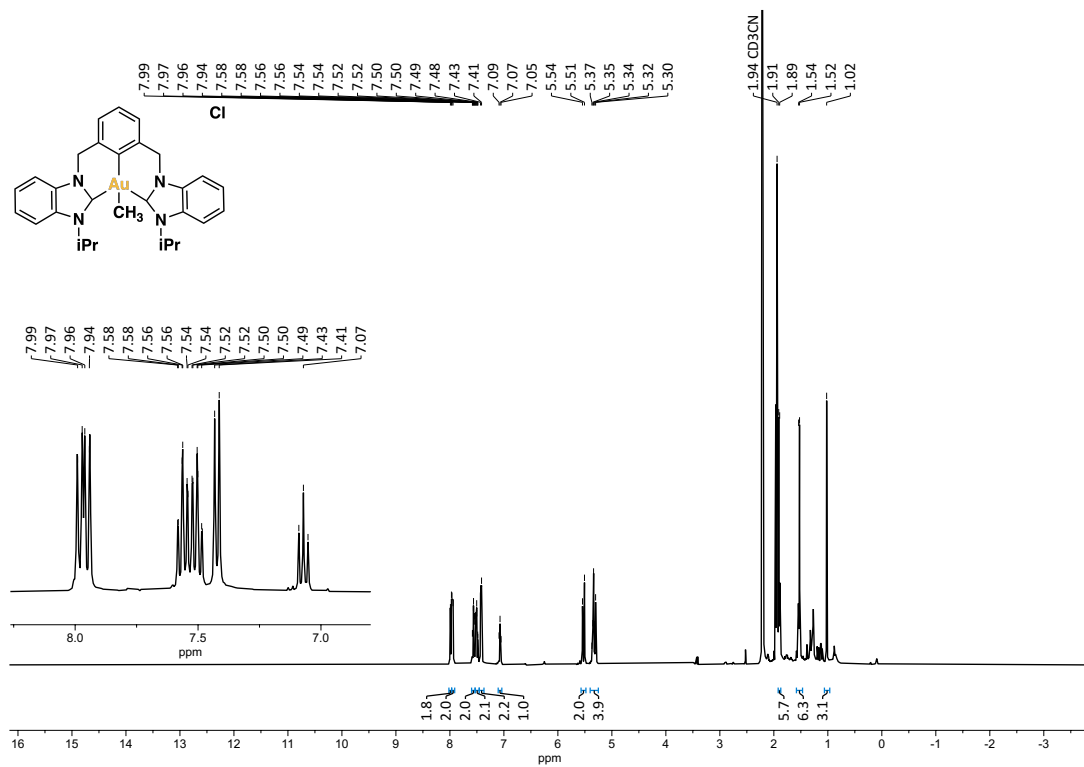

Figure S56. <sup>1</sup>H NMR (400MHz, 298K) of 8a in CD<sub>3</sub>CN

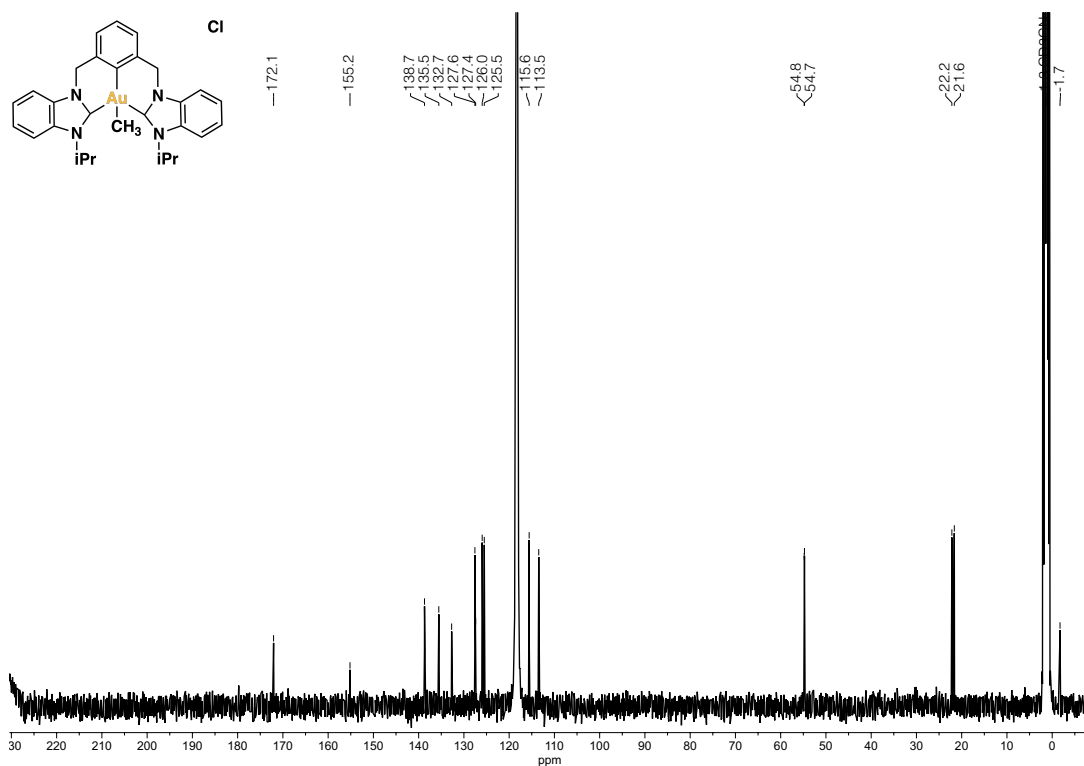

Figure S57. <sup>13</sup>C{<sup>1</sup>H} NMR (101MHz, 298K) of 8a in CD<sub>3</sub>CN

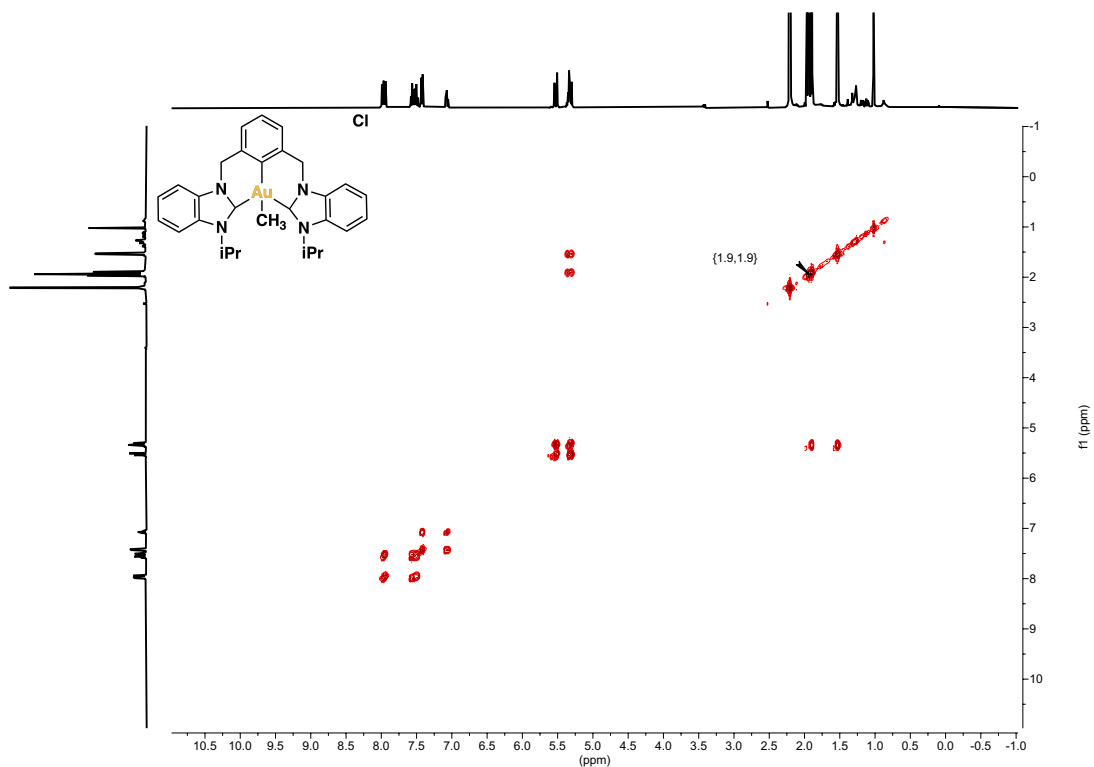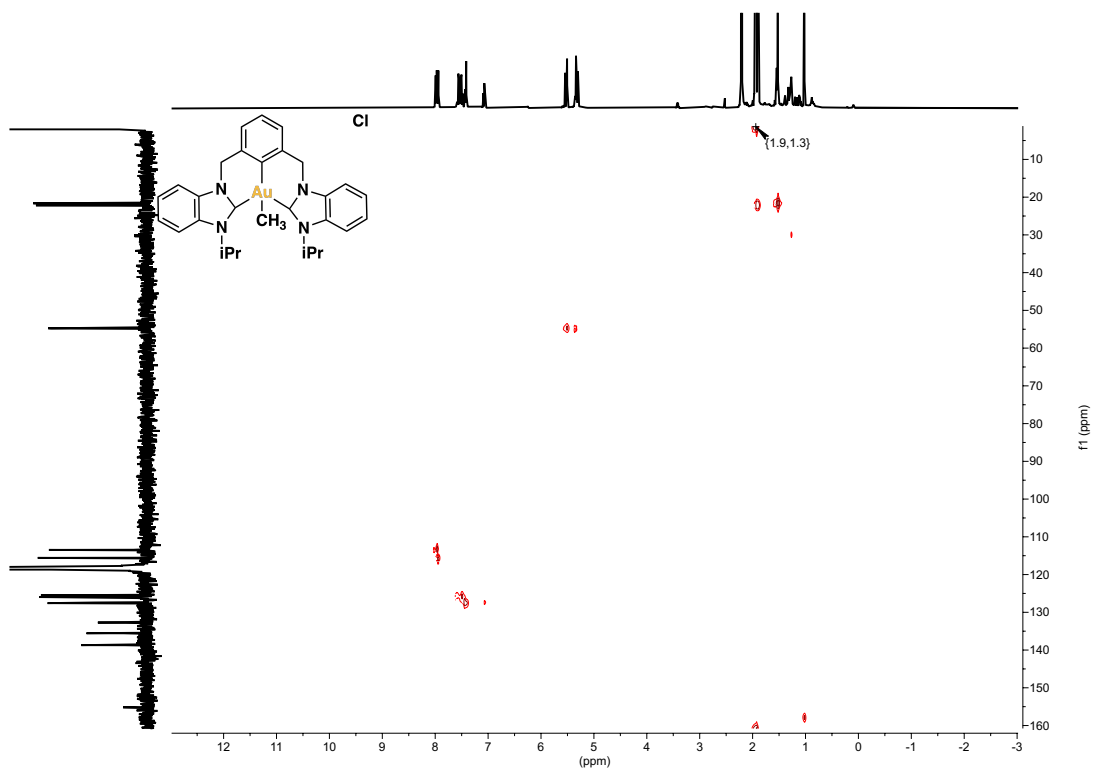

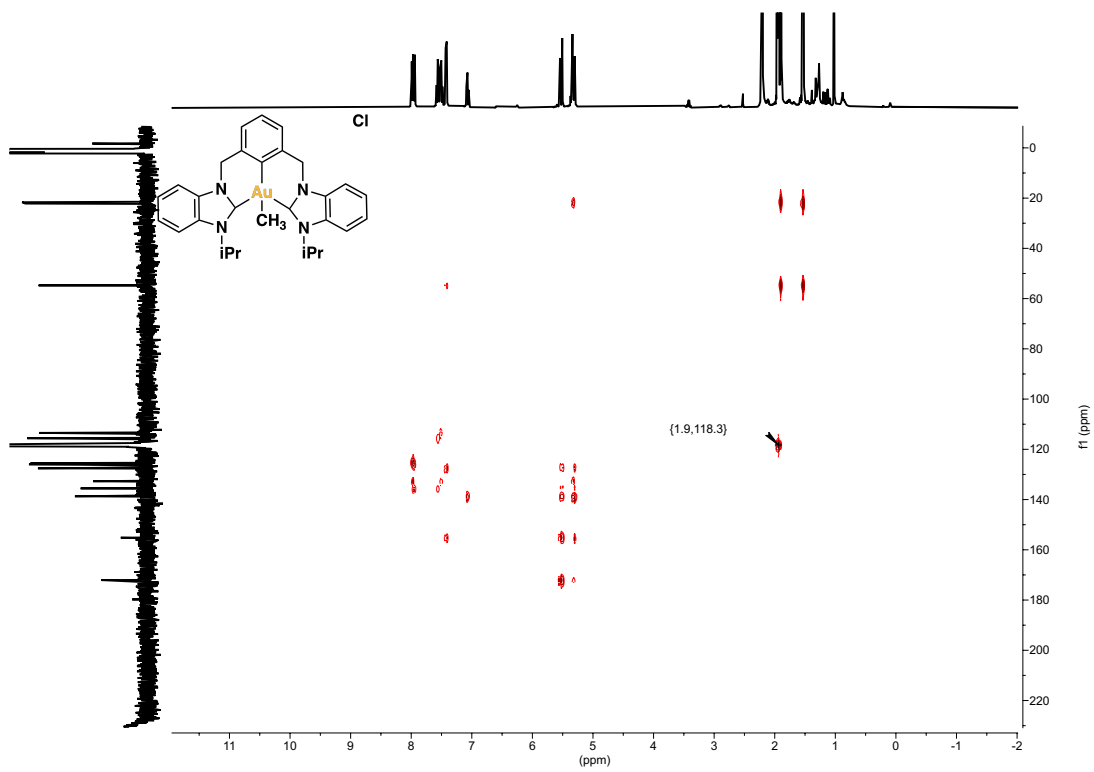

### 7.11 NMR spectra of complex 8b

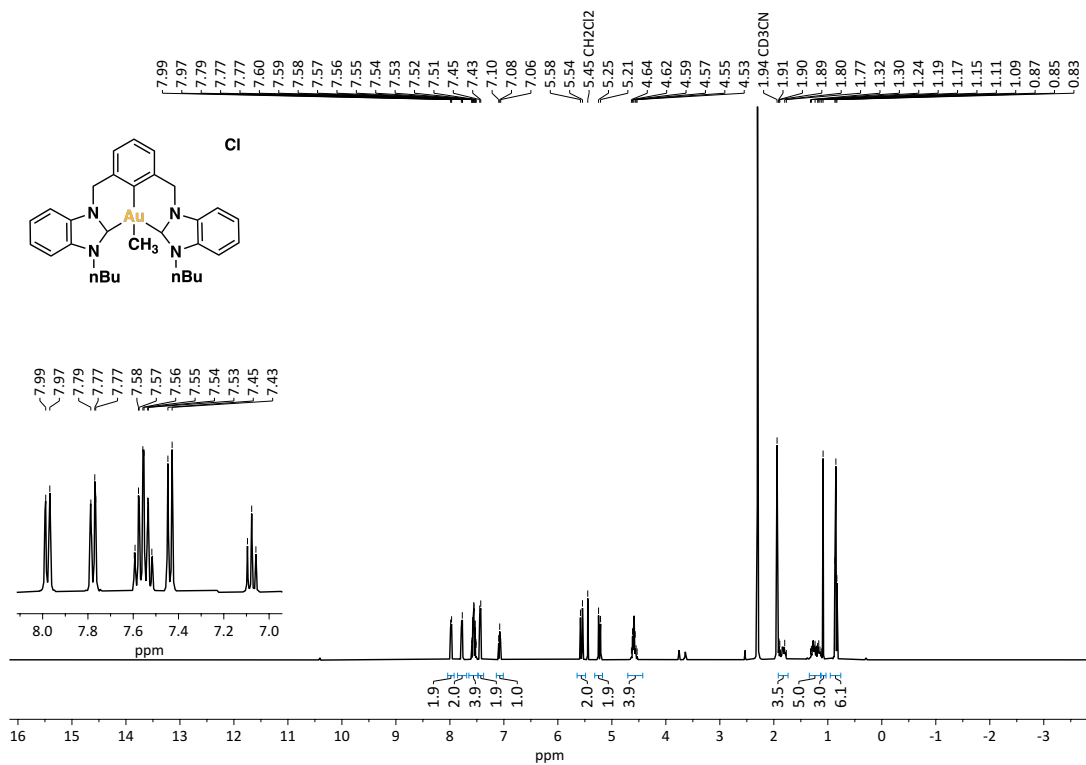

Figure S61. <sup>1</sup>H NMR (400MHz, 298K) of **8b** in CD<sub>3</sub>CN

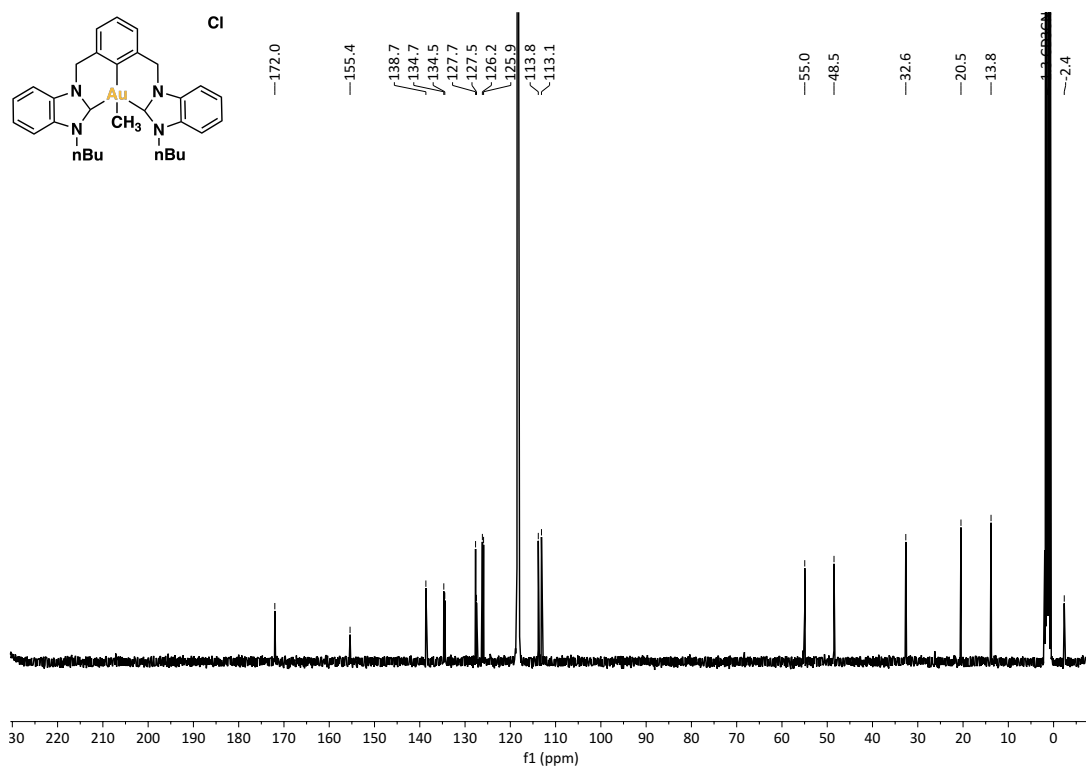

Figure S62. <sup>13</sup>C{<sup>1</sup>H} NMR (101MHz, 298K) of **8b** in CD<sub>3</sub>CN

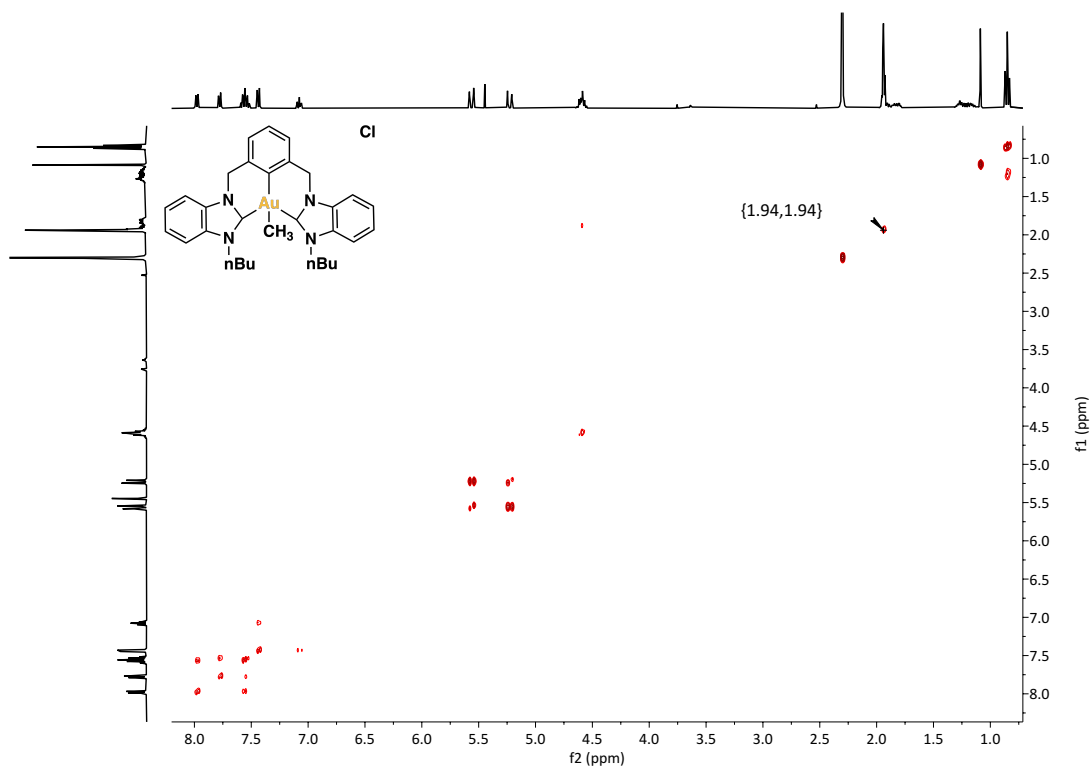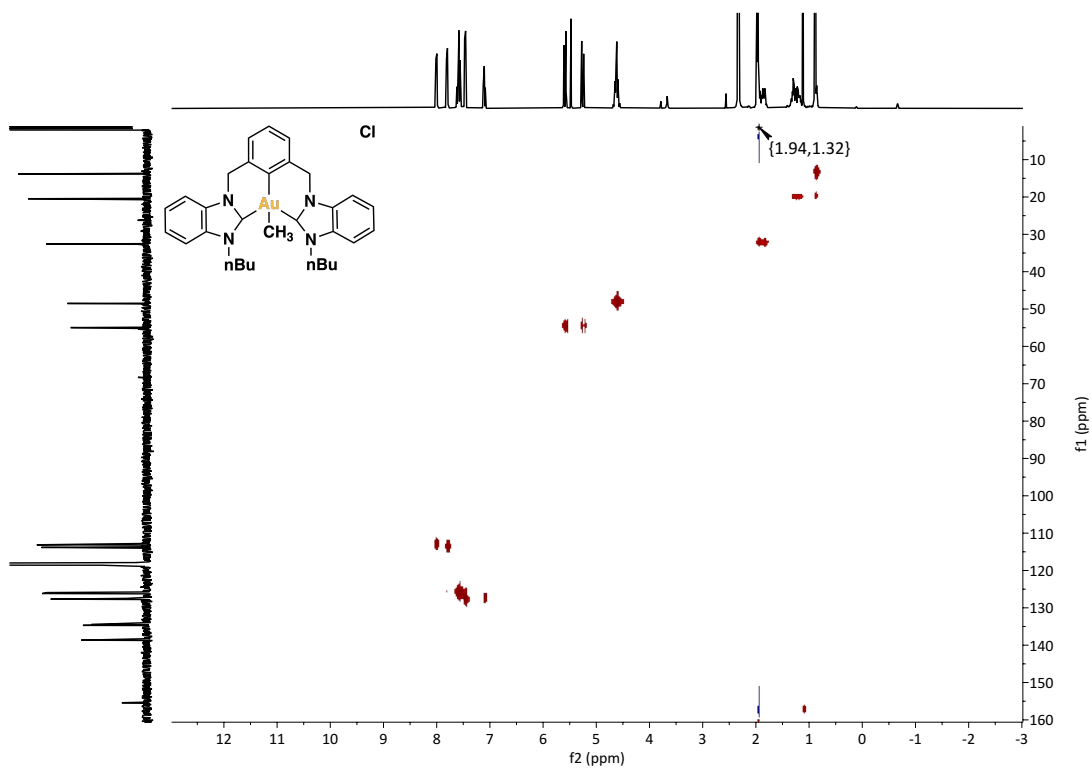

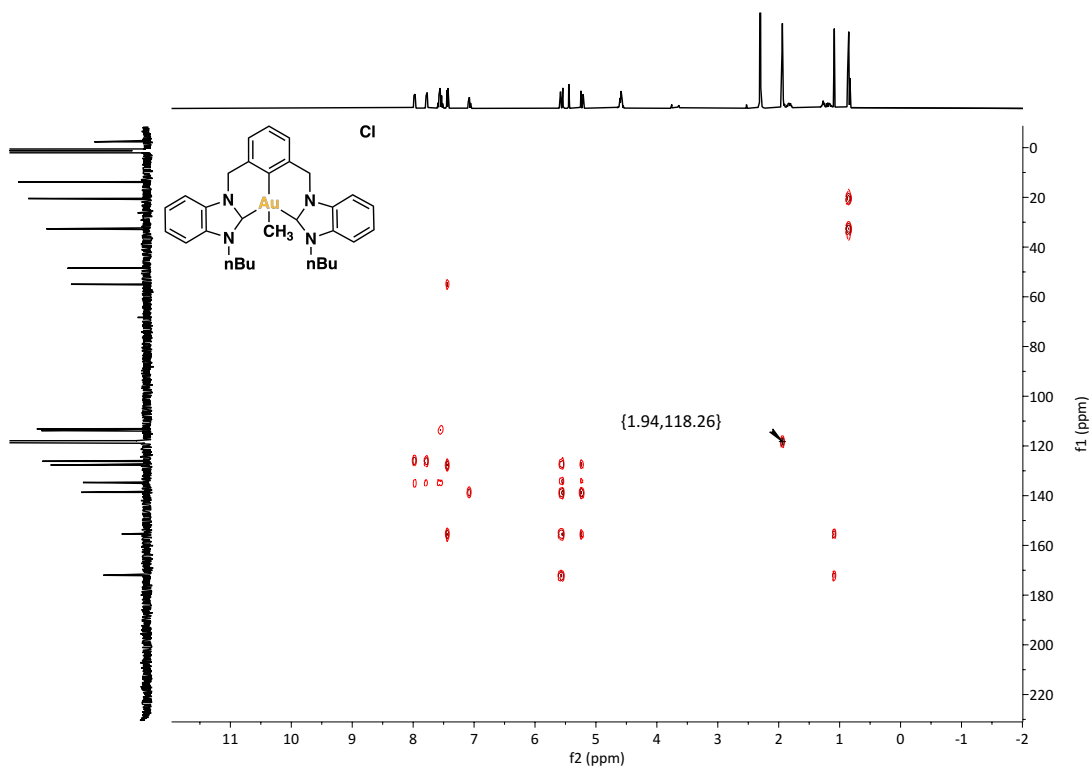

## 7.12 NMR spectra of complex 9a

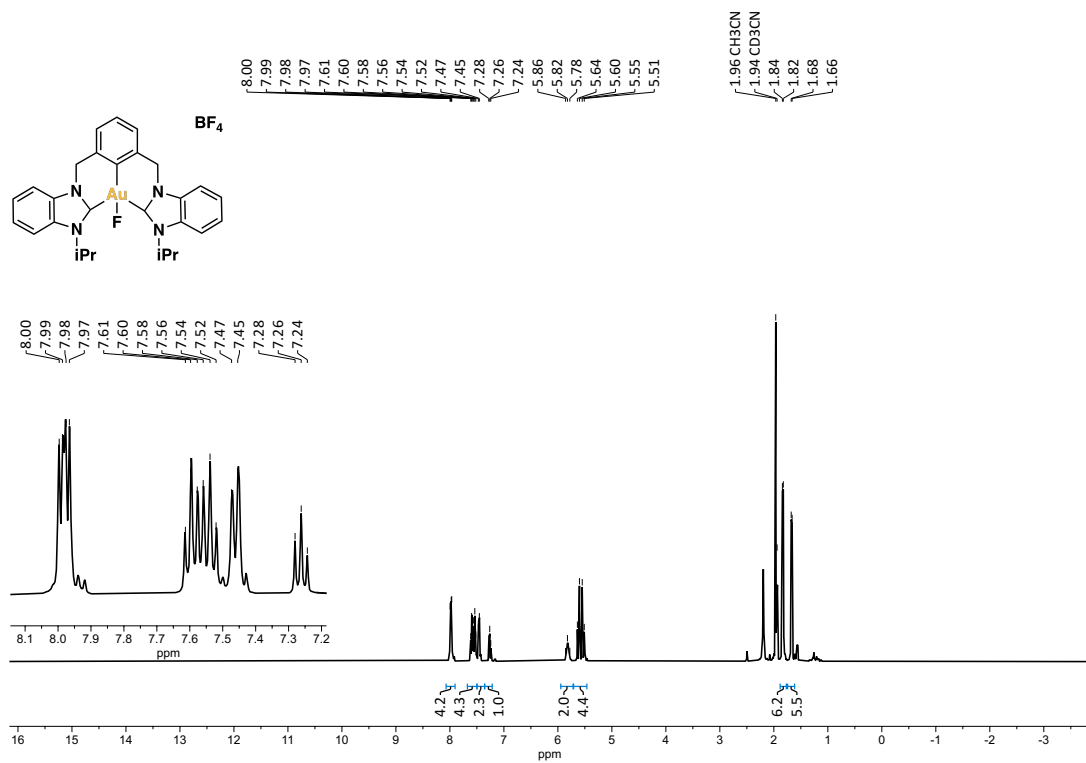

Figure S66. <sup>1</sup>H NMR (400MHz, 298K) of 9a in CD<sub>3</sub>CN

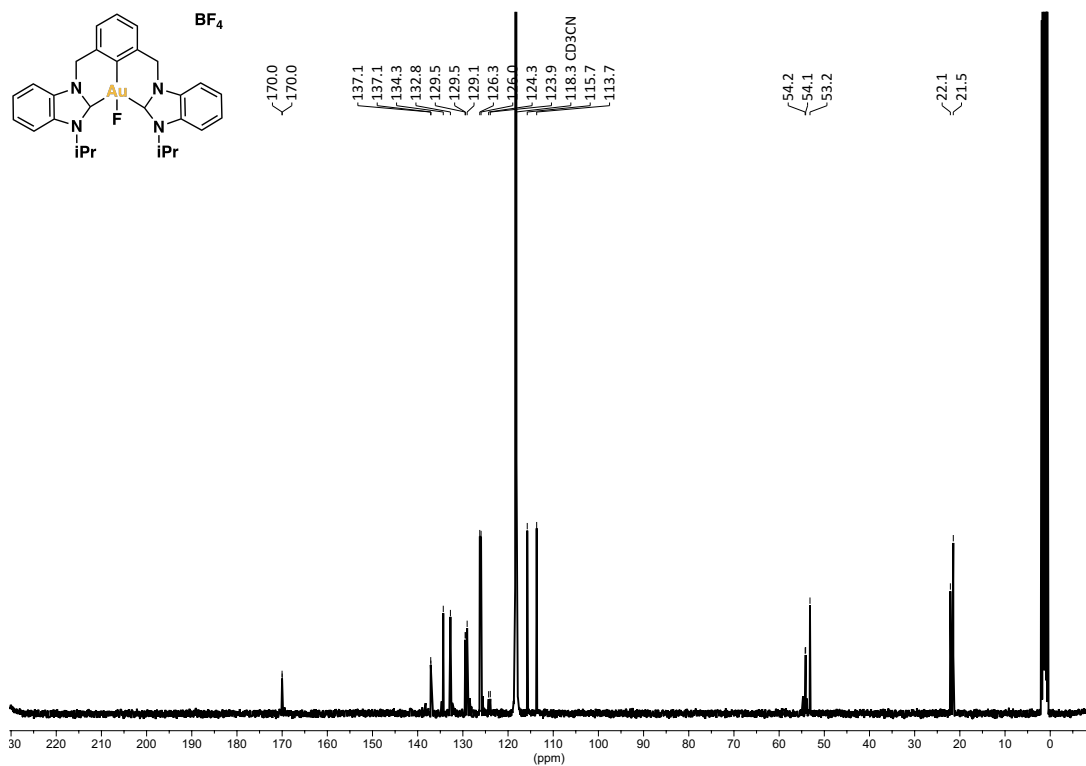

Figure S67. <sup>13</sup>C{<sup>1</sup>H} NMR (101MHz, 298K) of 9a in CD<sub>3</sub>CN

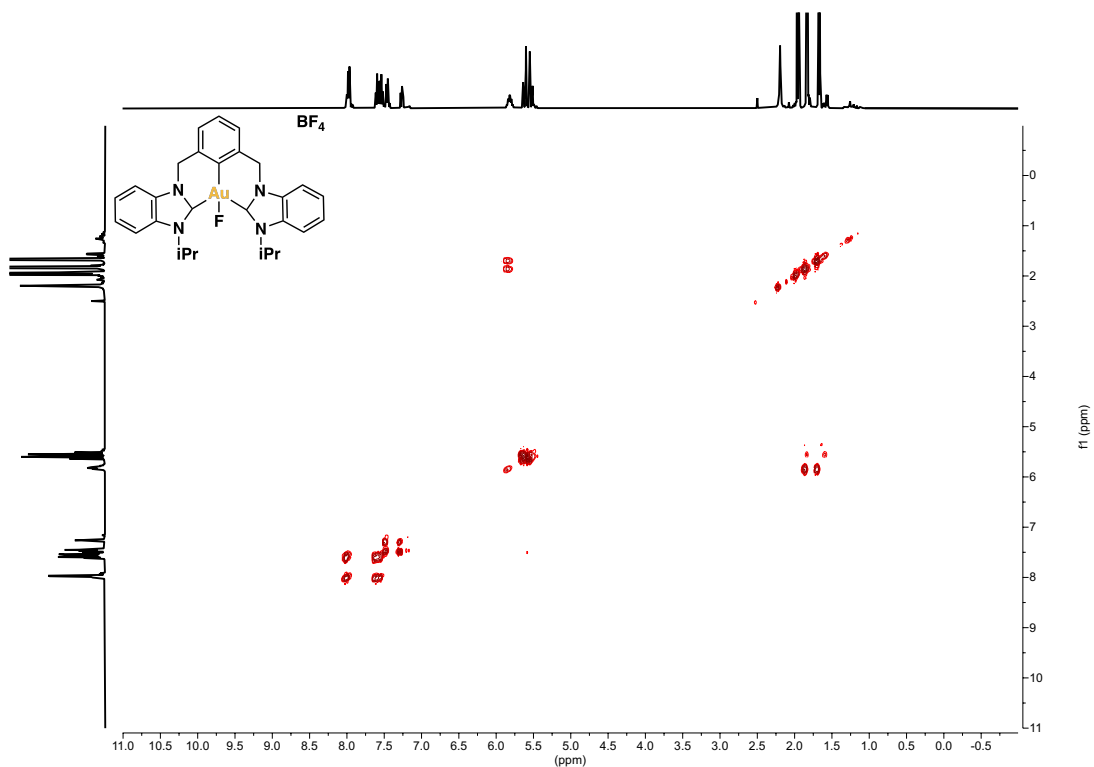

Figure S68.  $^1\text{H}, ^1\text{H}$  COSY NMR (400MHz, 298K) of **9a** in  $\text{CD}_3\text{CN}$

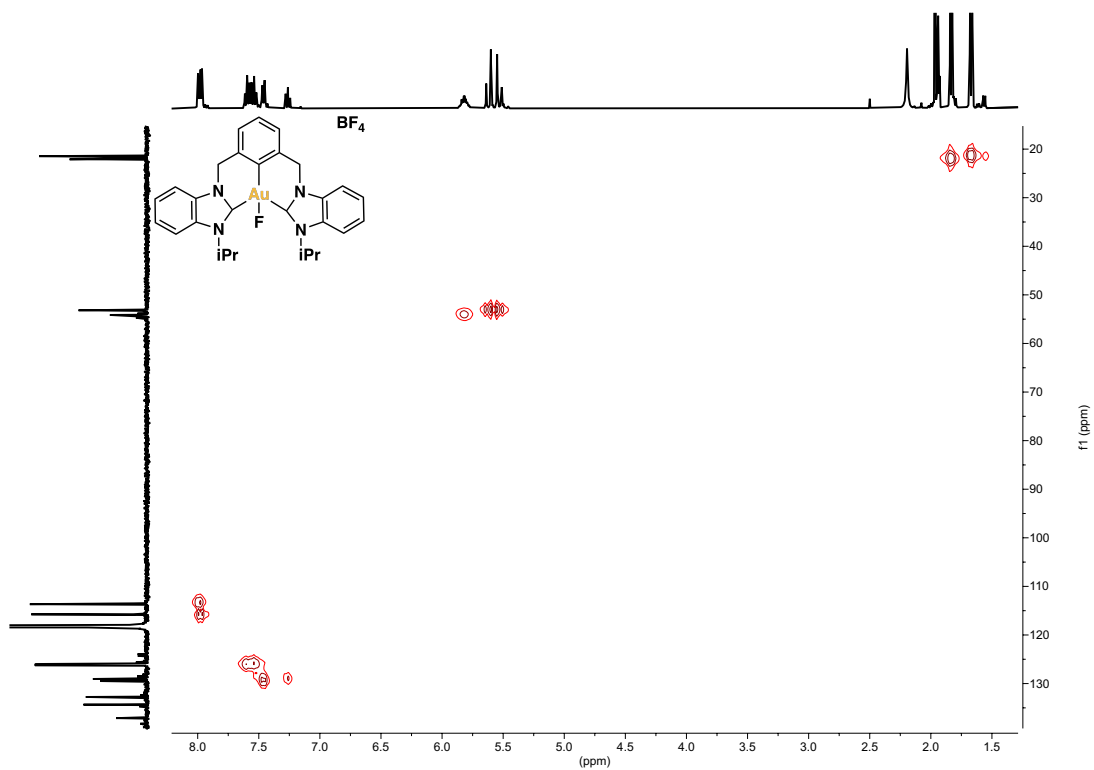

Figure S69.  $^1\text{H}, ^{13}\text{C}$  HSQC NMR (400MHz, 298K) of **9a** in  $\text{CD}_3\text{CN}$



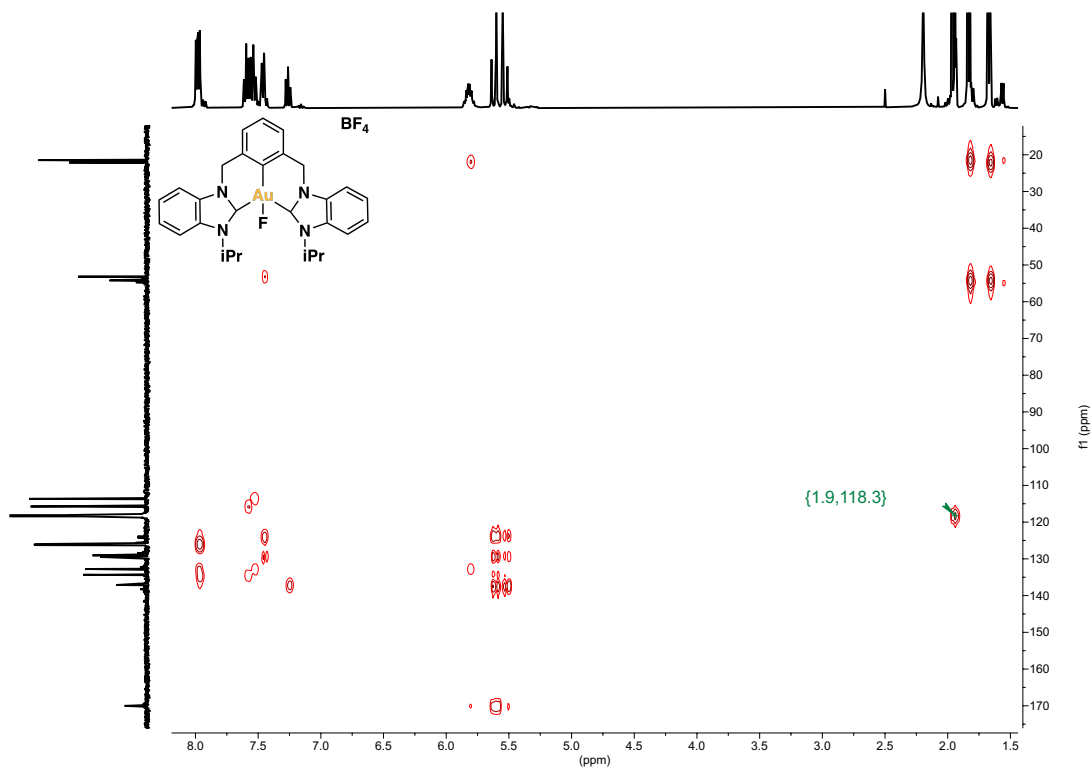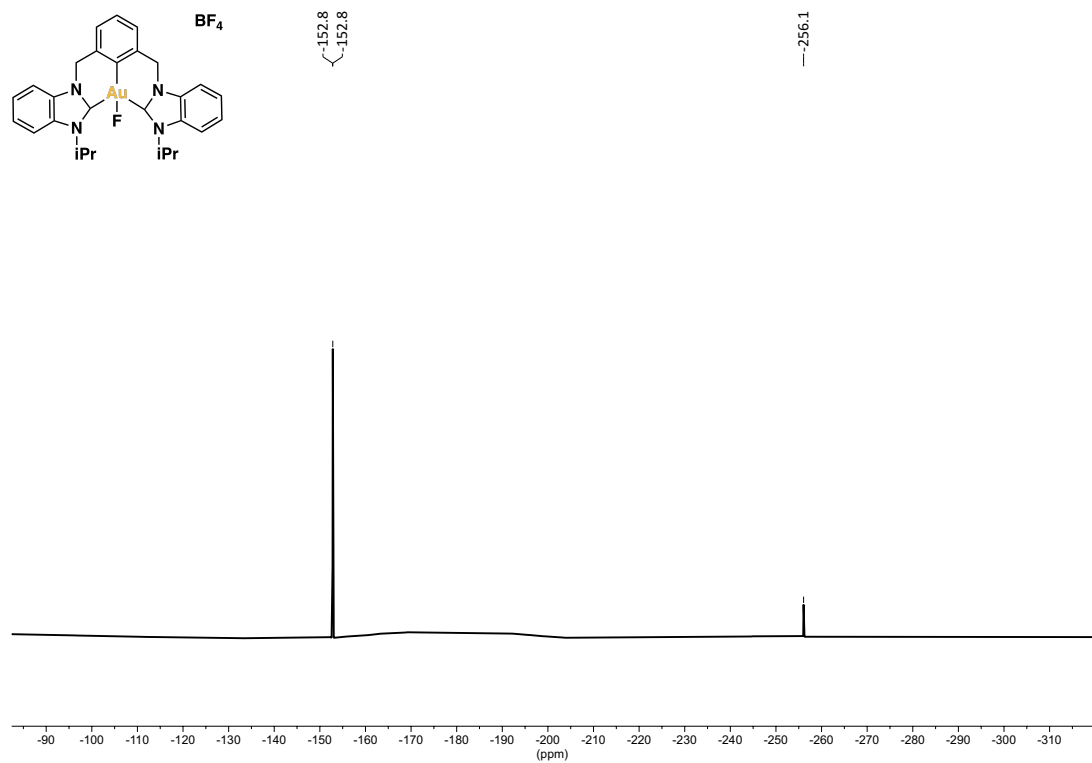

### 7.13 NMR spectra of complex 9b

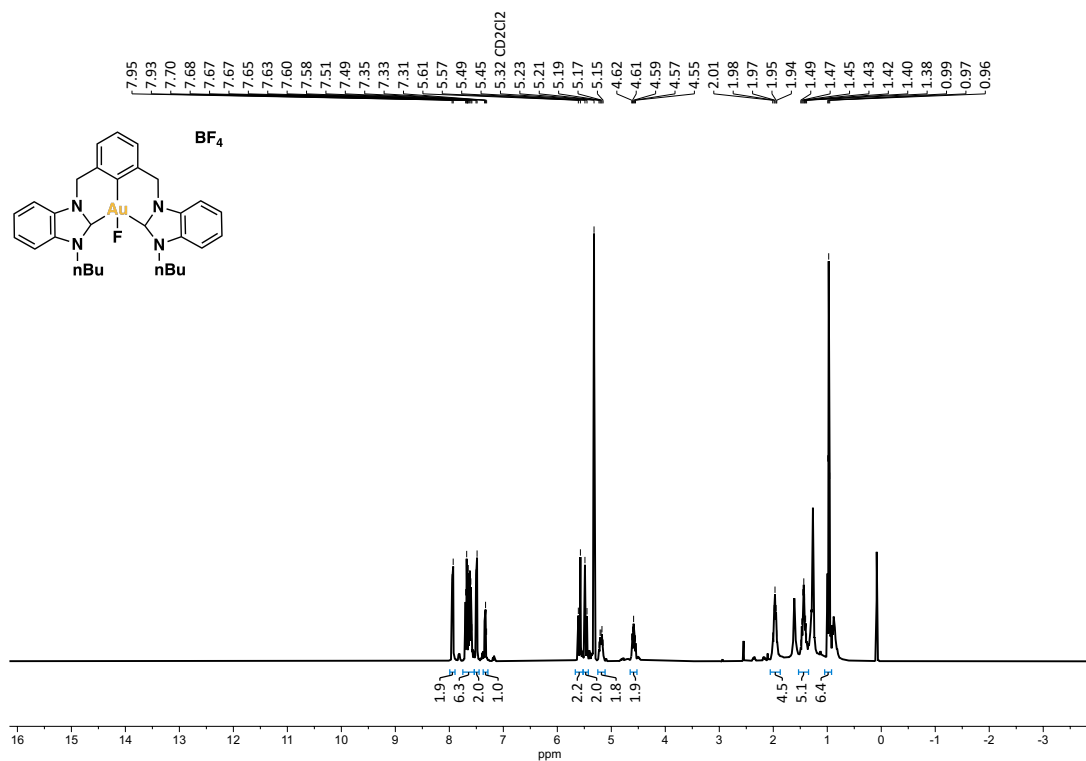

Figure S72. <sup>1</sup>H NMR (400MHz, 298K) of 9b in CD<sub>2</sub>Cl<sub>2</sub>

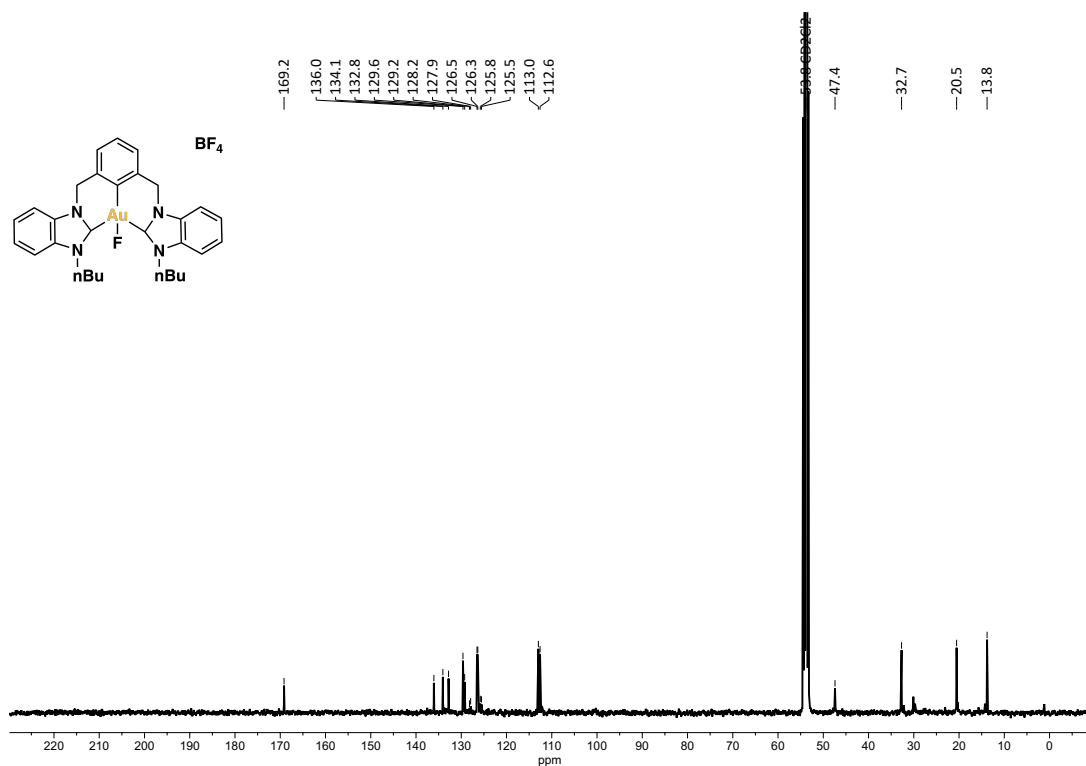

Figure S73. <sup>13</sup>C{<sup>1</sup>H} NMR (101MHz, 298K) of 9b in CD<sub>2</sub>Cl<sub>2</sub>

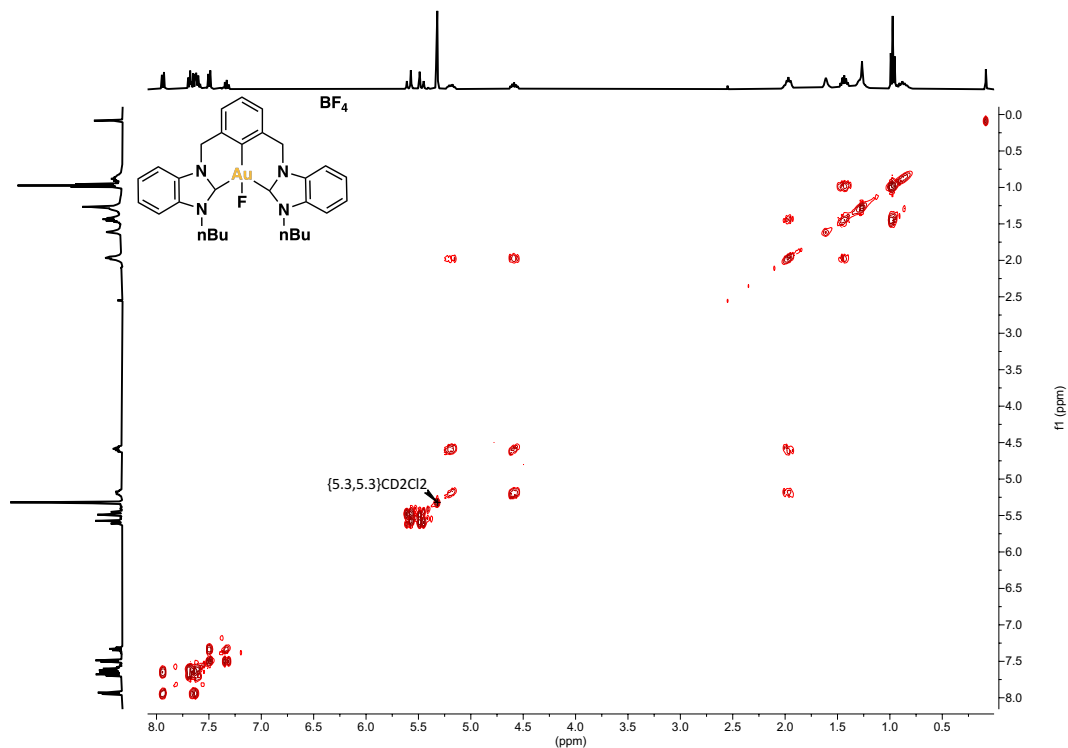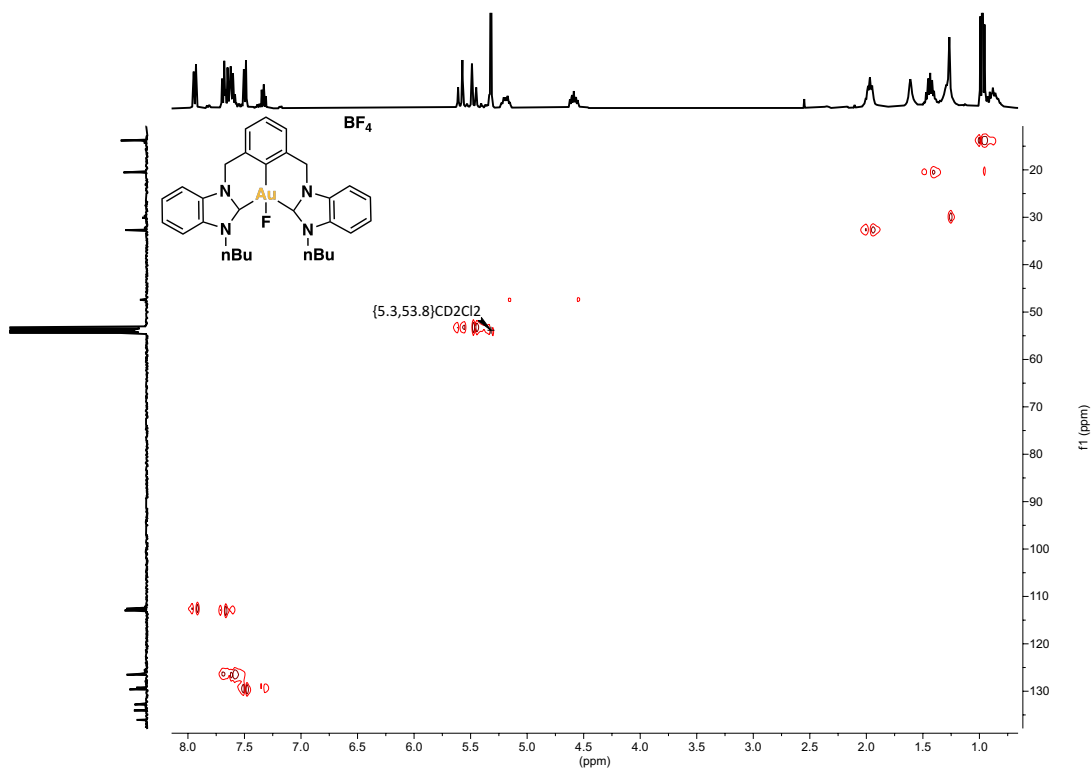

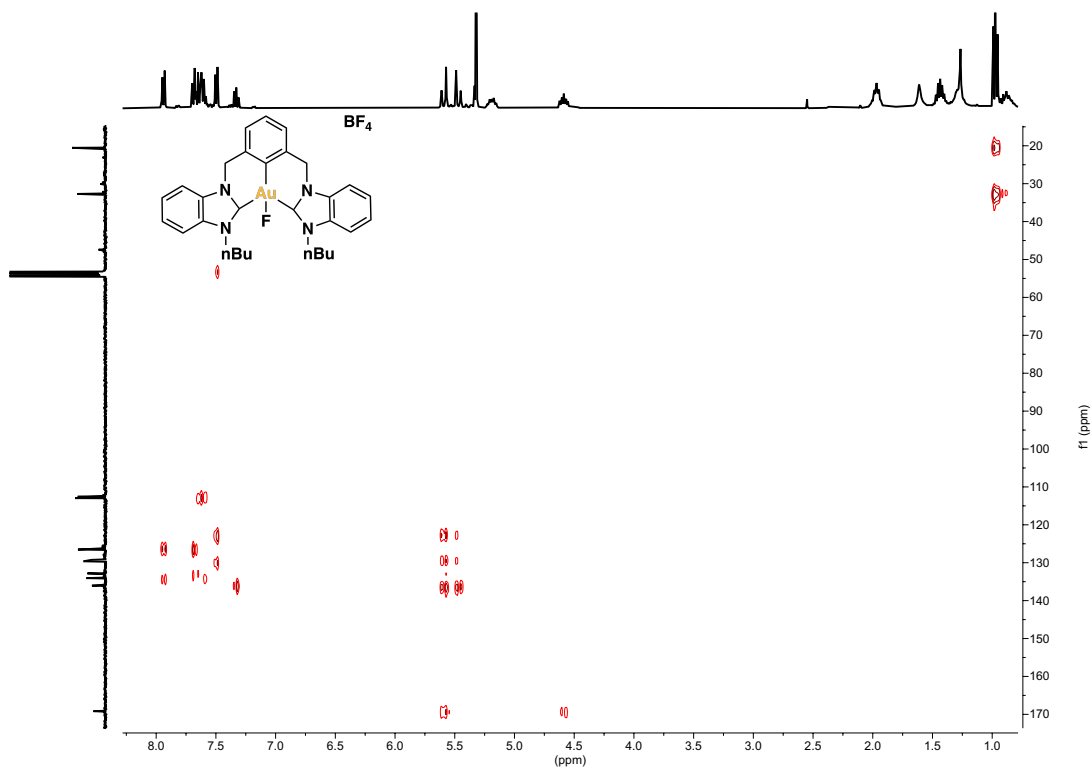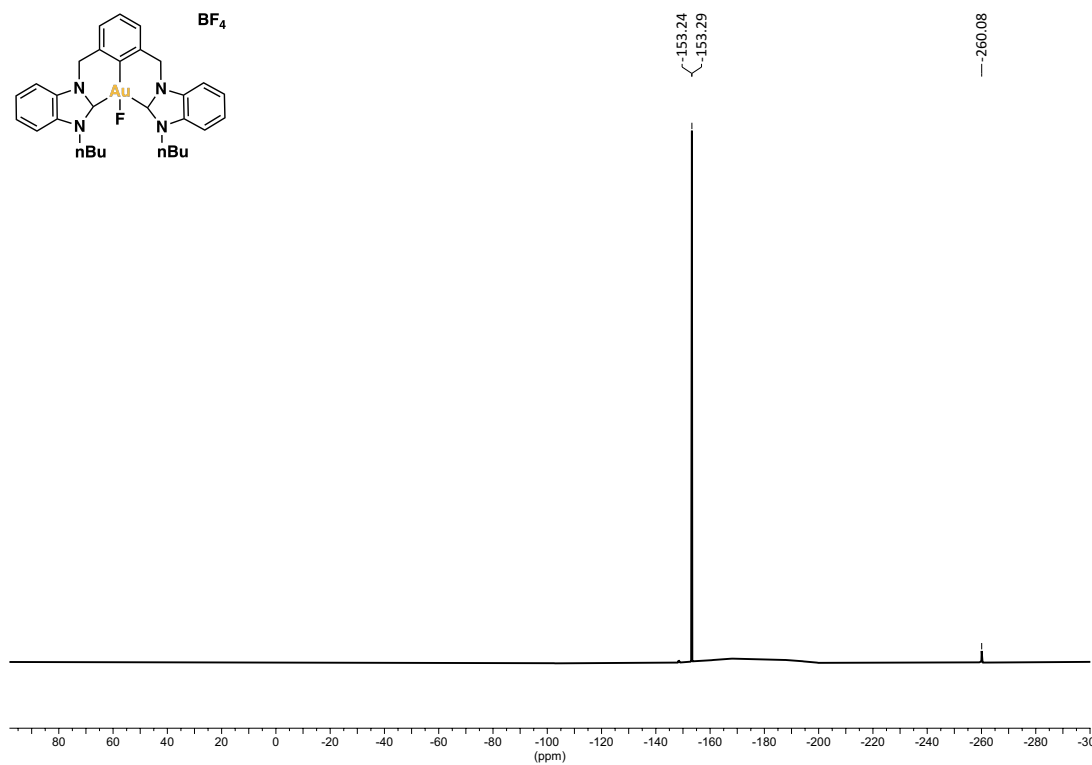

## 7.14 NMR spectra of complex 10a

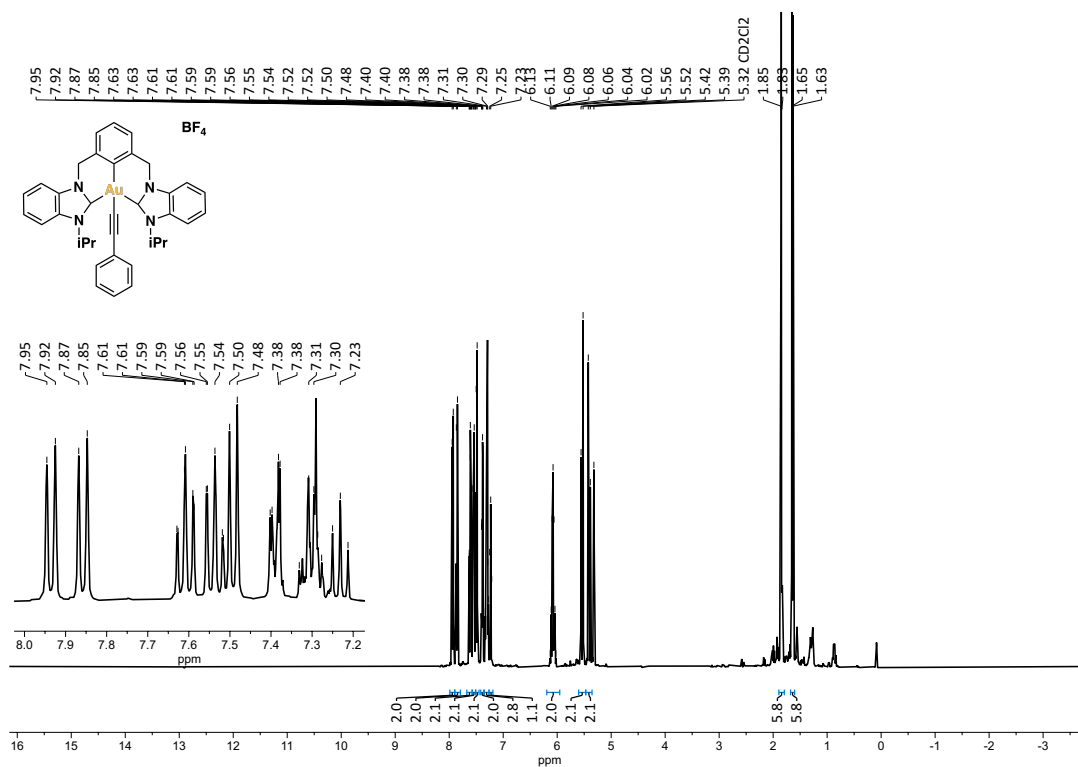

Figure S78.  $^1\text{H}$  NMR (400MHz, 298K) of 10a in  $\text{CD}_2\text{Cl}_2$

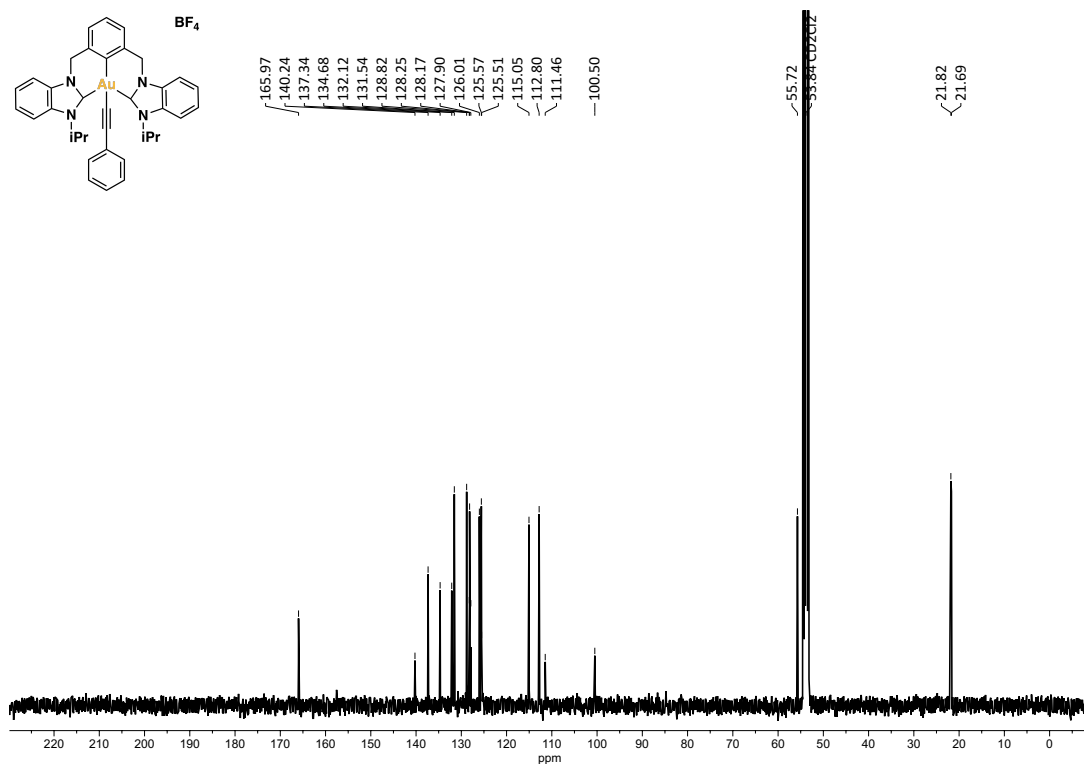

Figure S79.  $^{13}\text{C}\{^1\text{H}\}$  NMR (101MHz, 298K) of 10a in  $\text{CD}_2\text{Cl}_2$

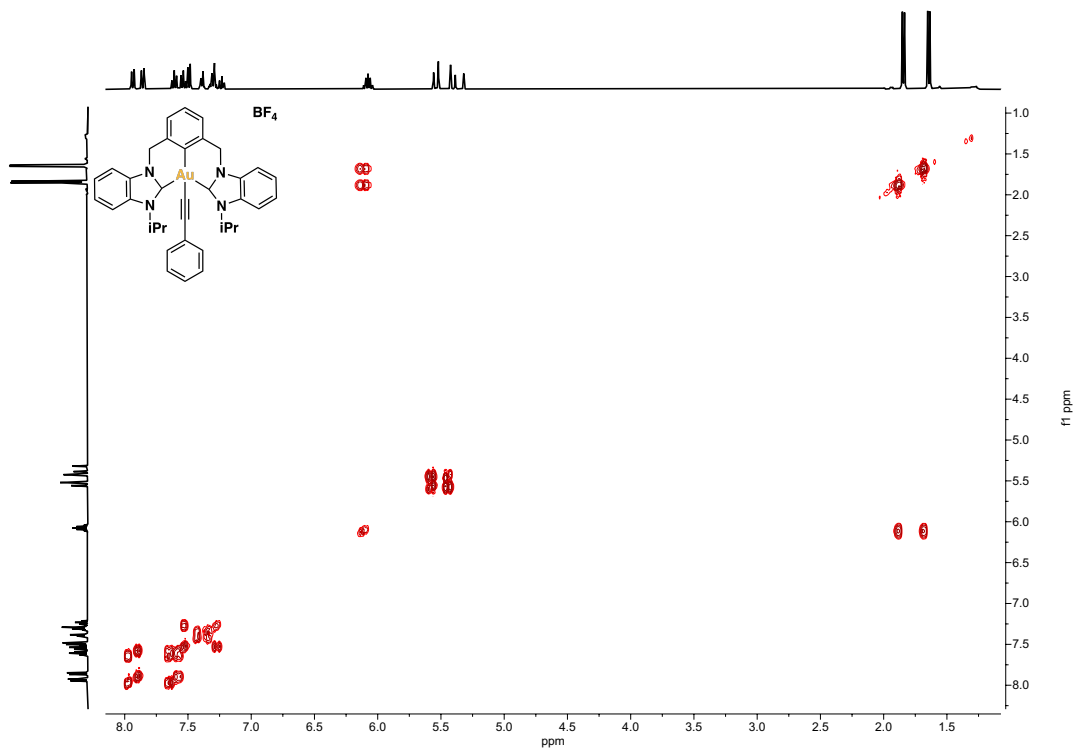

Figure S80.  $^1\text{H}, ^1\text{H}$  COSY NMR (400MHz, 298K) of **10a** in  $\text{CD}_2\text{Cl}_2$

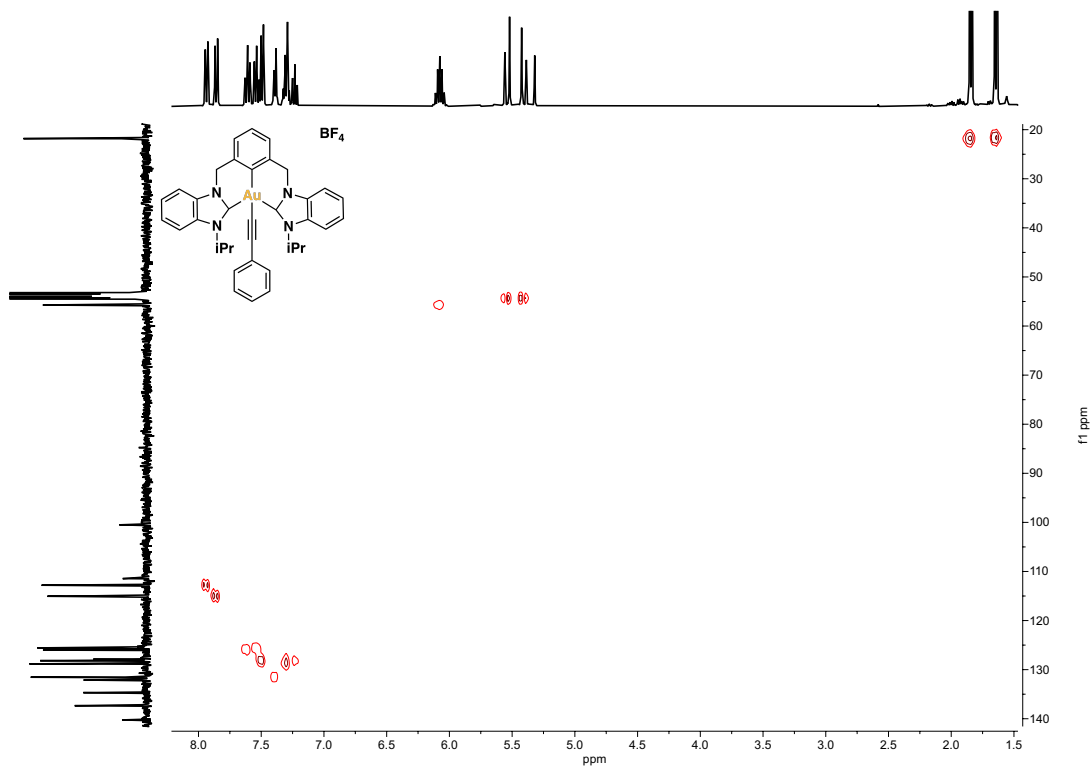

Figure S81.  $^1\text{H}, ^{13}\text{C}$  HSQC NMR (400MHz, 298K) of **10a** in  $\text{CD}_2\text{Cl}_2$

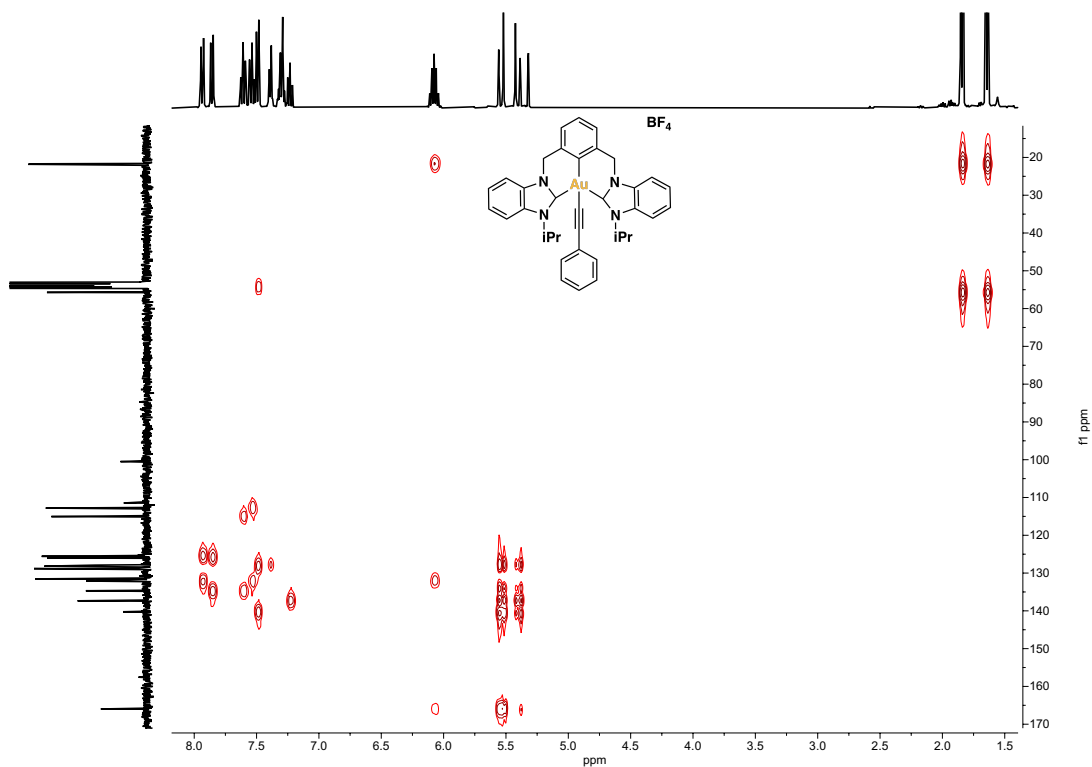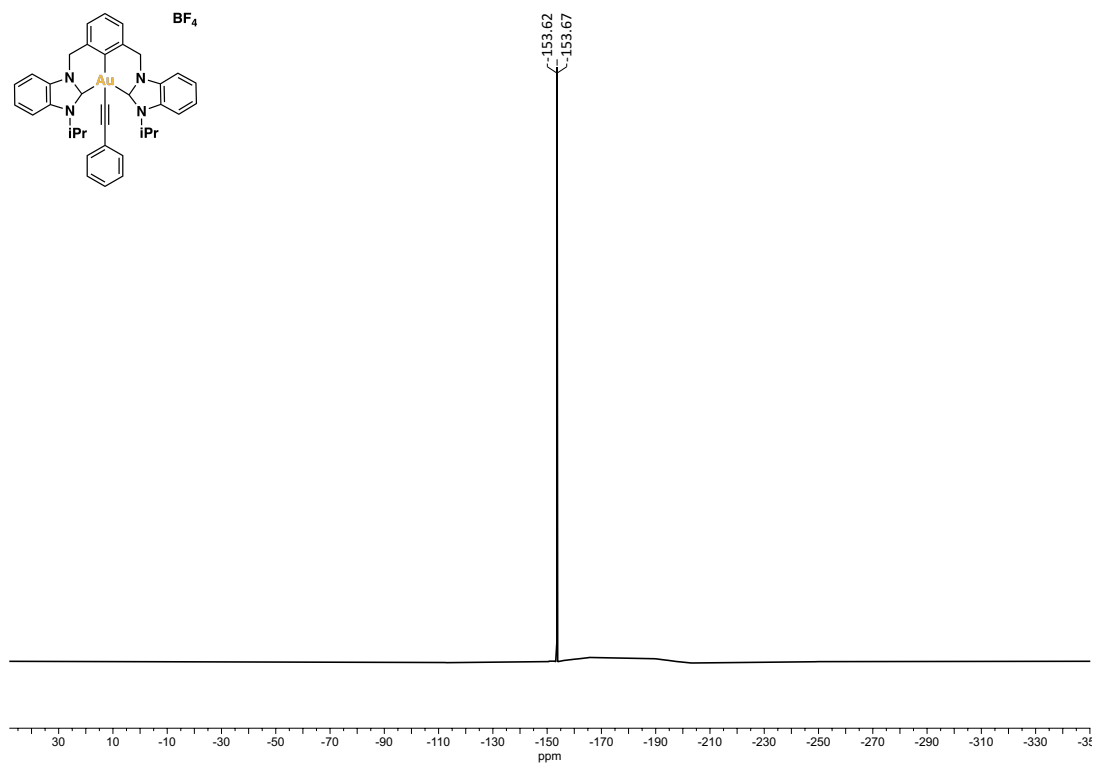

7.15 NMR spectra of complex **10b**

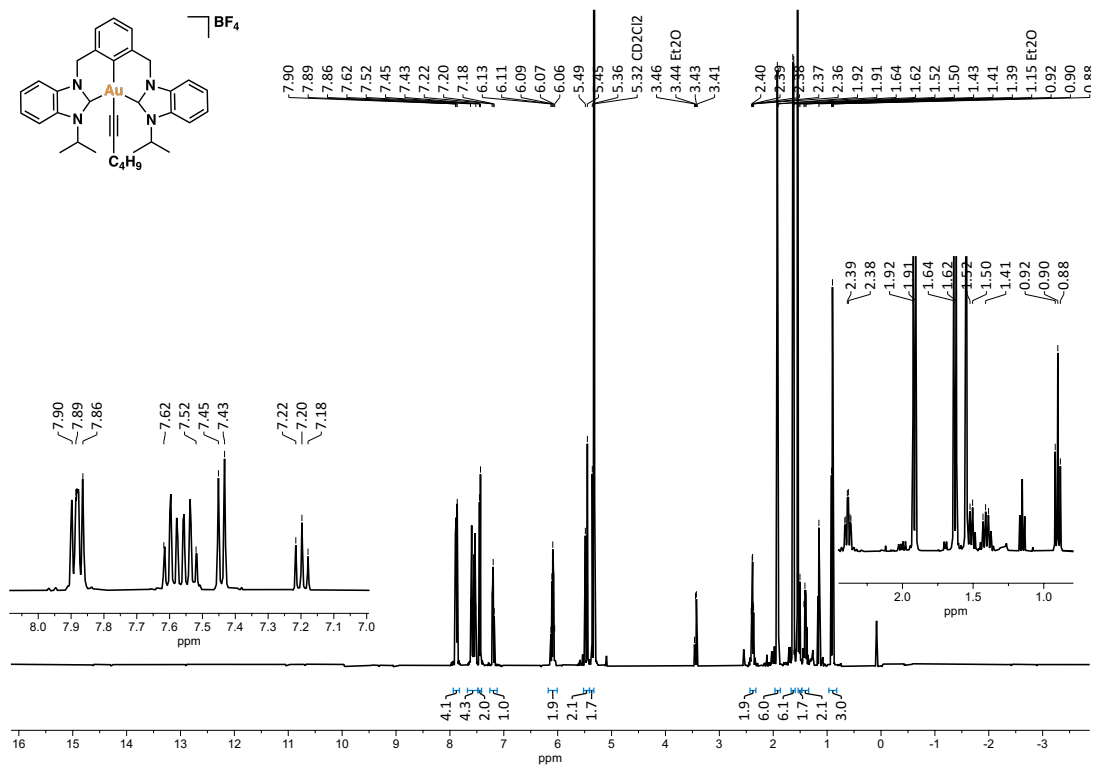

Figure S84. <sup>1</sup>H NMR (400MHz, 298K) of **10b** in CD<sub>2</sub>Cl<sub>2</sub>

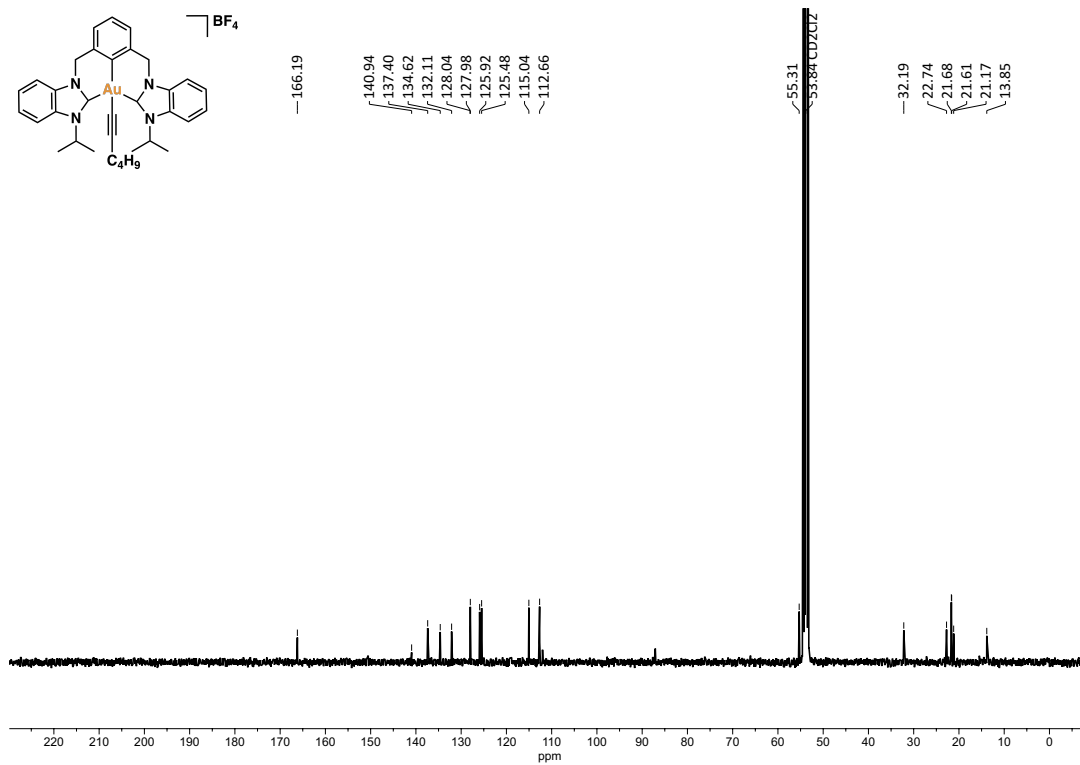

Figure S85. <sup>13</sup>C{<sup>1</sup>H} NMR (101MHz, 298K) of **10b** in CD<sub>2</sub>Cl<sub>2</sub>



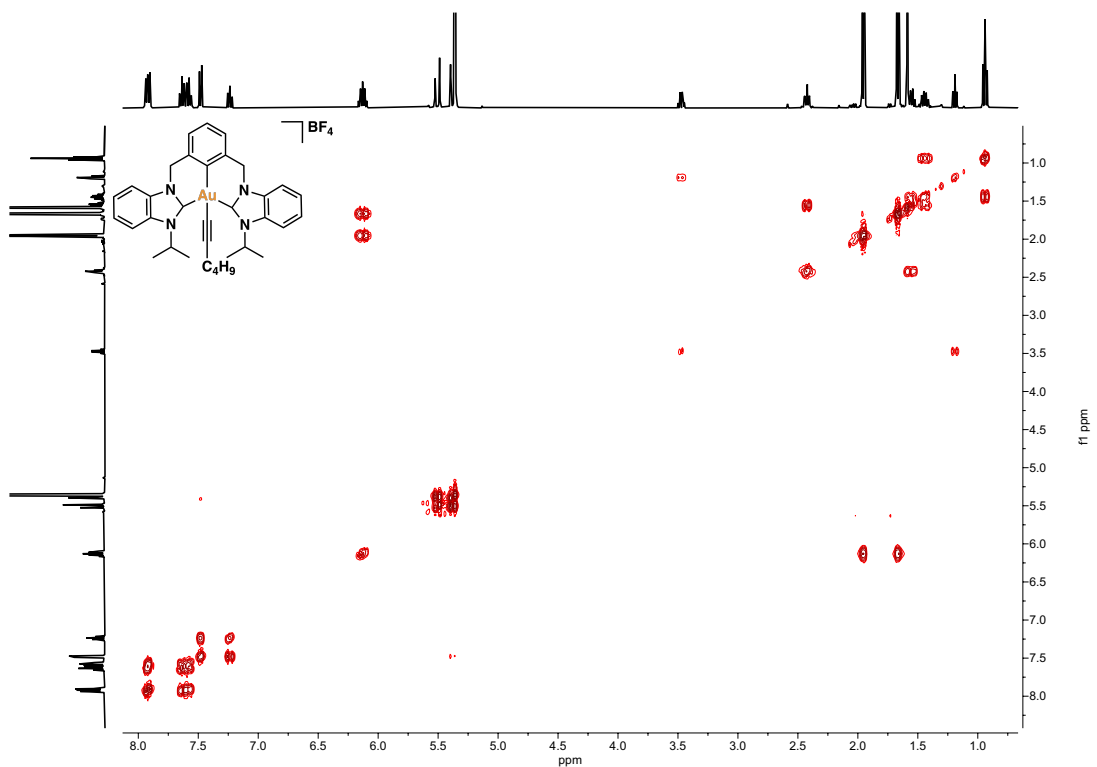

Figure S86.  $^1\text{H}, ^1\text{H}$  COSY NMR (400MHz, 298K) of **10b** in  $\text{CD}_2\text{Cl}_2$

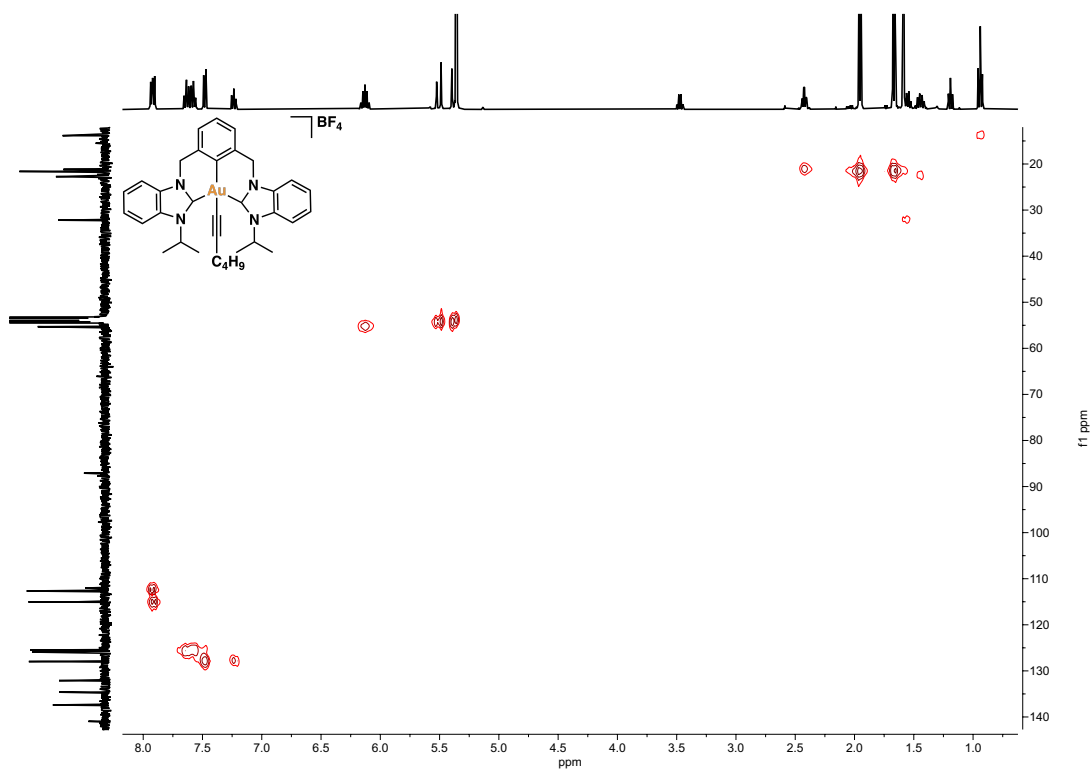

Figure S87.  $^1\text{H}, ^{13}\text{C}$  HSQC NMR (400MHz, 298K) of **10b** in  $\text{CD}_2\text{Cl}_2$

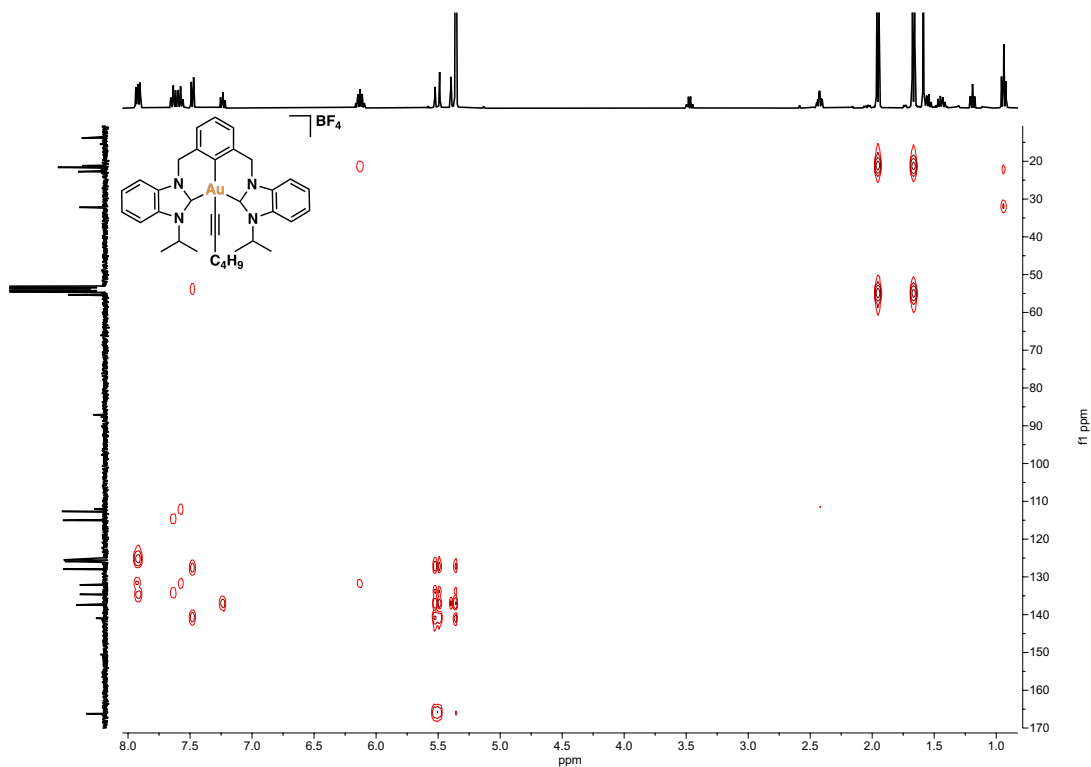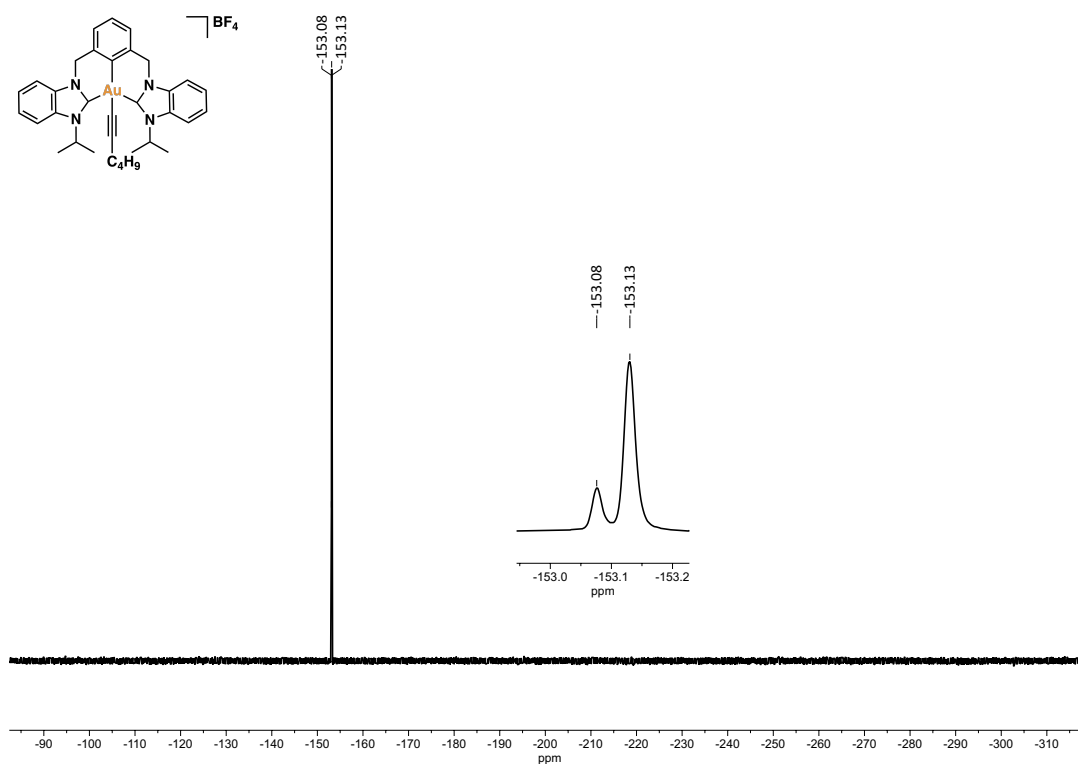

### 7.16 NMR spectra of complex 11a

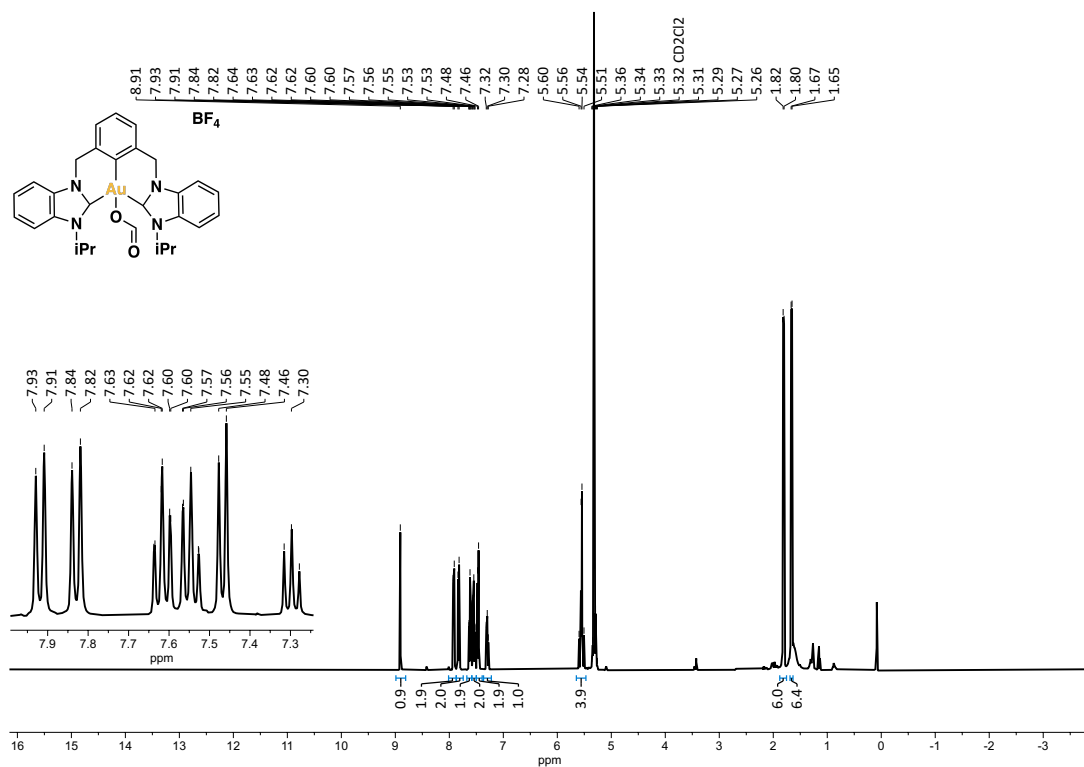

Figure S90. <sup>1</sup>H NMR (400MHz, 298K) of **11a** in CD<sub>2</sub>Cl<sub>2</sub>

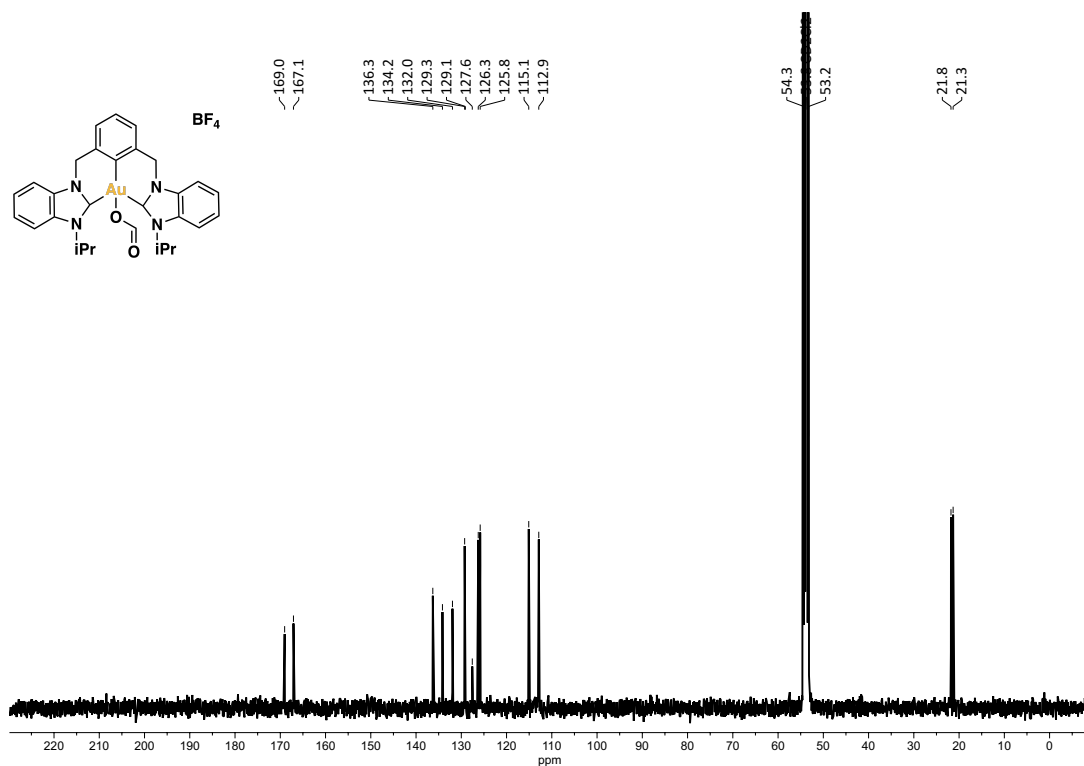

Figure S91. <sup>13</sup>C{<sup>1</sup>H} NMR (101MHz, 298K) of **11a** in CD<sub>2</sub>Cl<sub>2</sub>

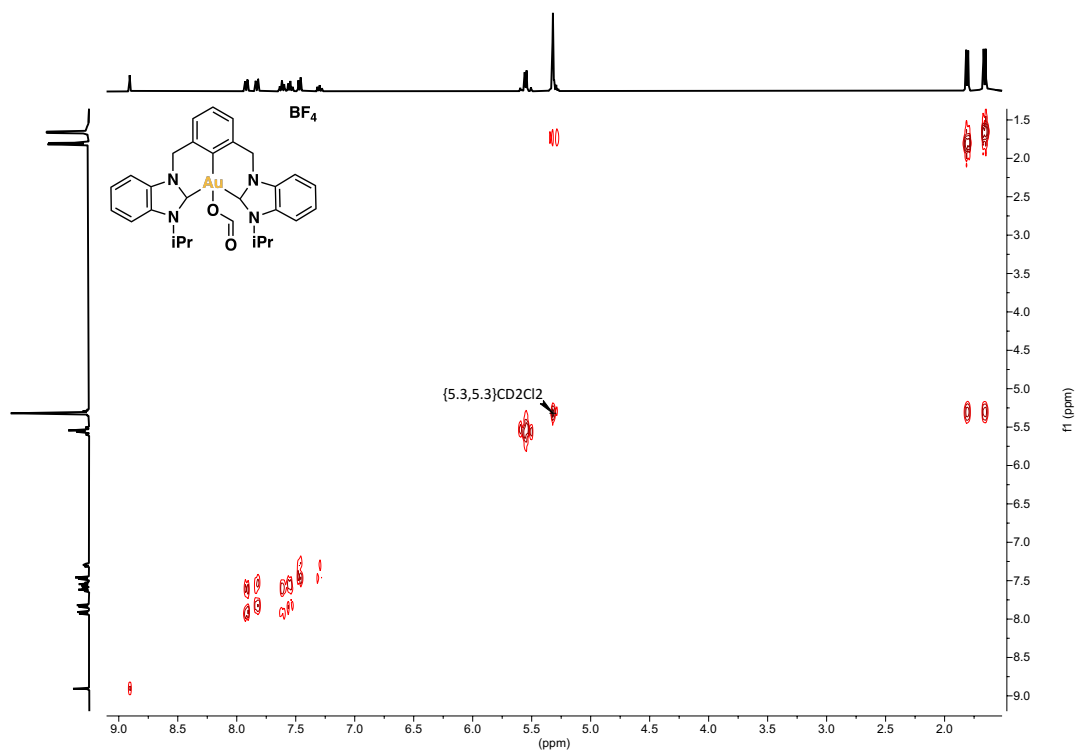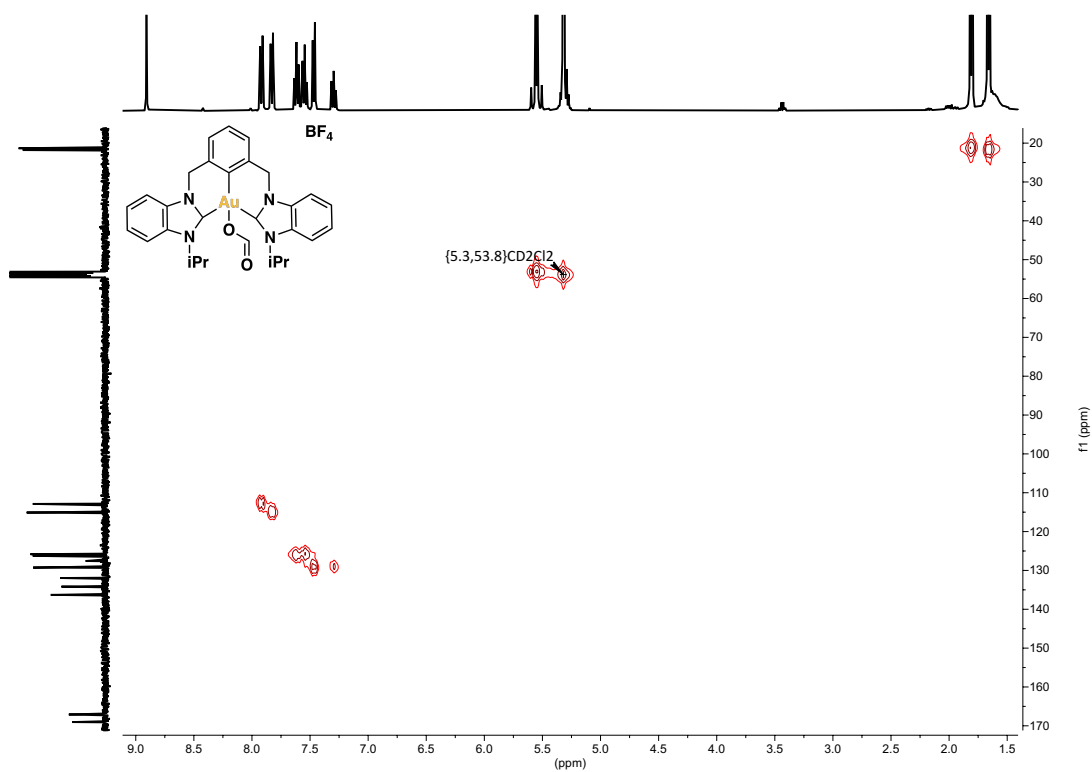

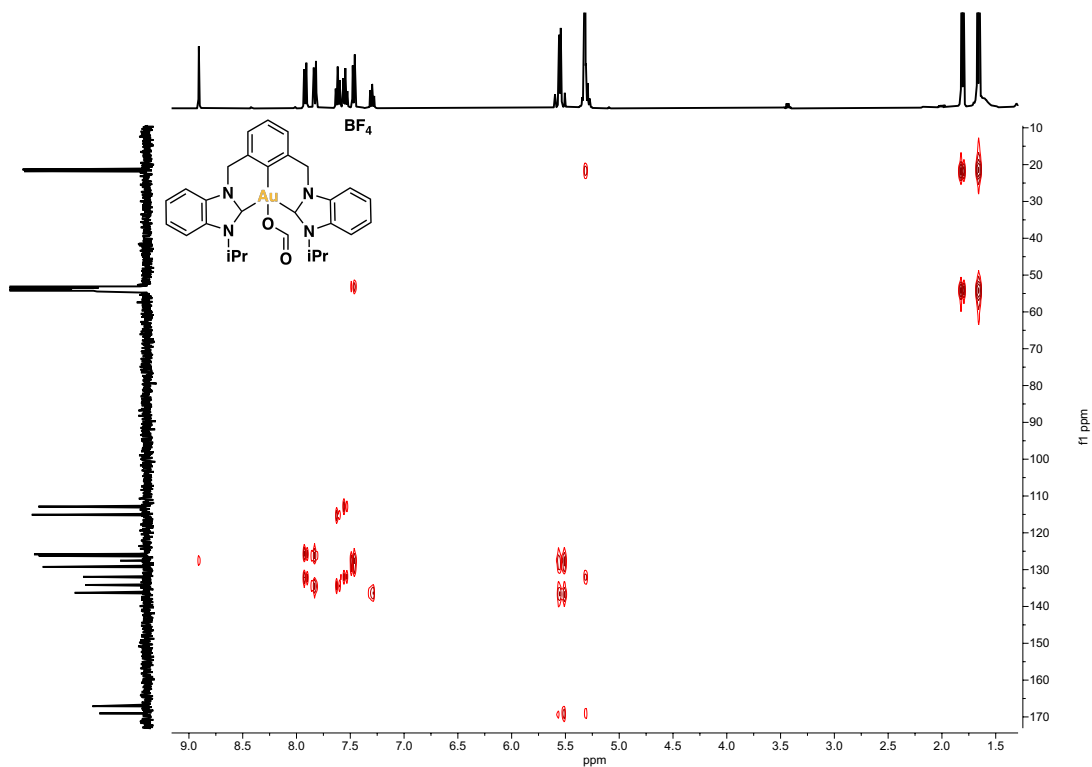

Figure S94.  $^1\text{H}$ , $^{13}\text{C}$  HMBC NMR (400MHz, 298K) of **11a** in  $\text{CD}_2\text{Cl}_2$

## 7.17 NMR spectra of complex 12a

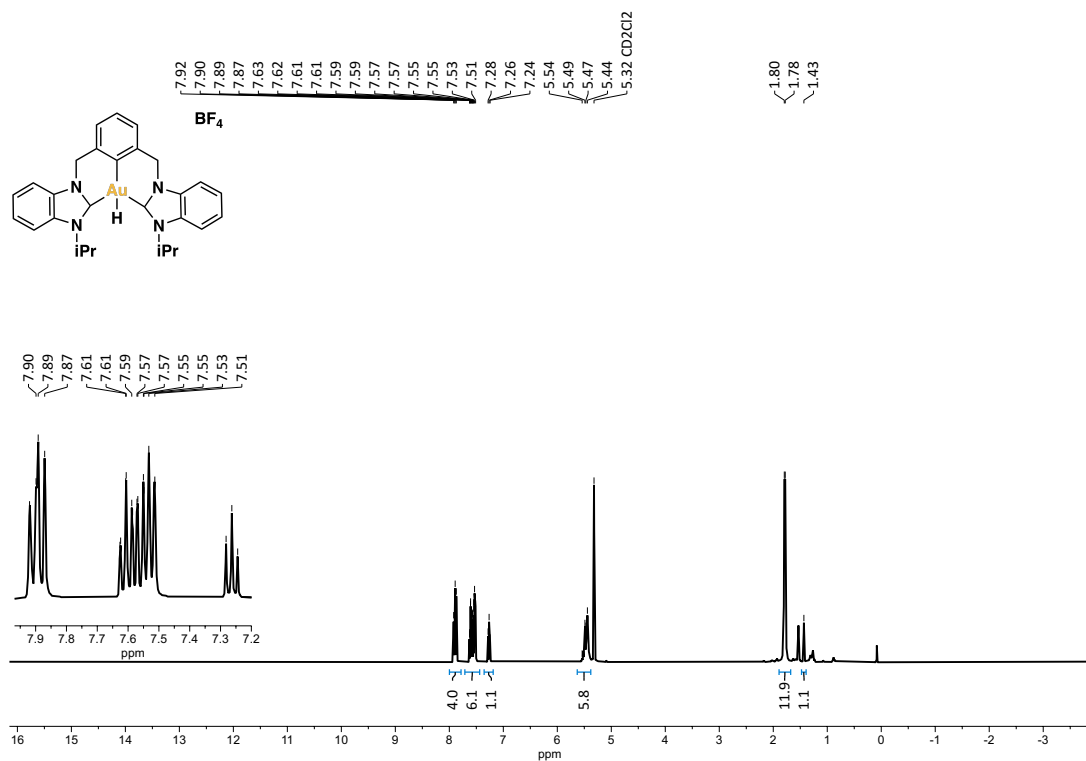

Figure S95.  $^1\text{H NMR}$  (400 MHz, 298 K) of **12a** in  $\text{CD}_2\text{Cl}_2$

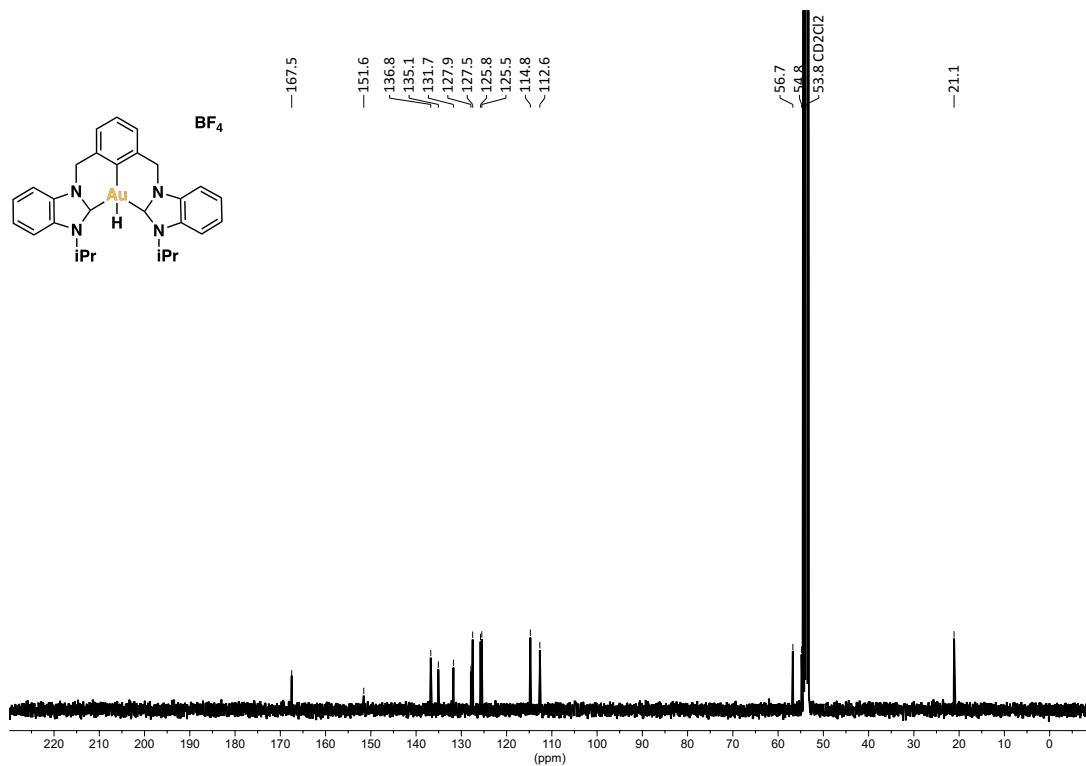

Figure S96.  $^{13}\text{C}\{^1\text{H}\}$  NMR (101 MHz, 298 K) of **12a** in  $\text{CD}_2\text{Cl}_2$

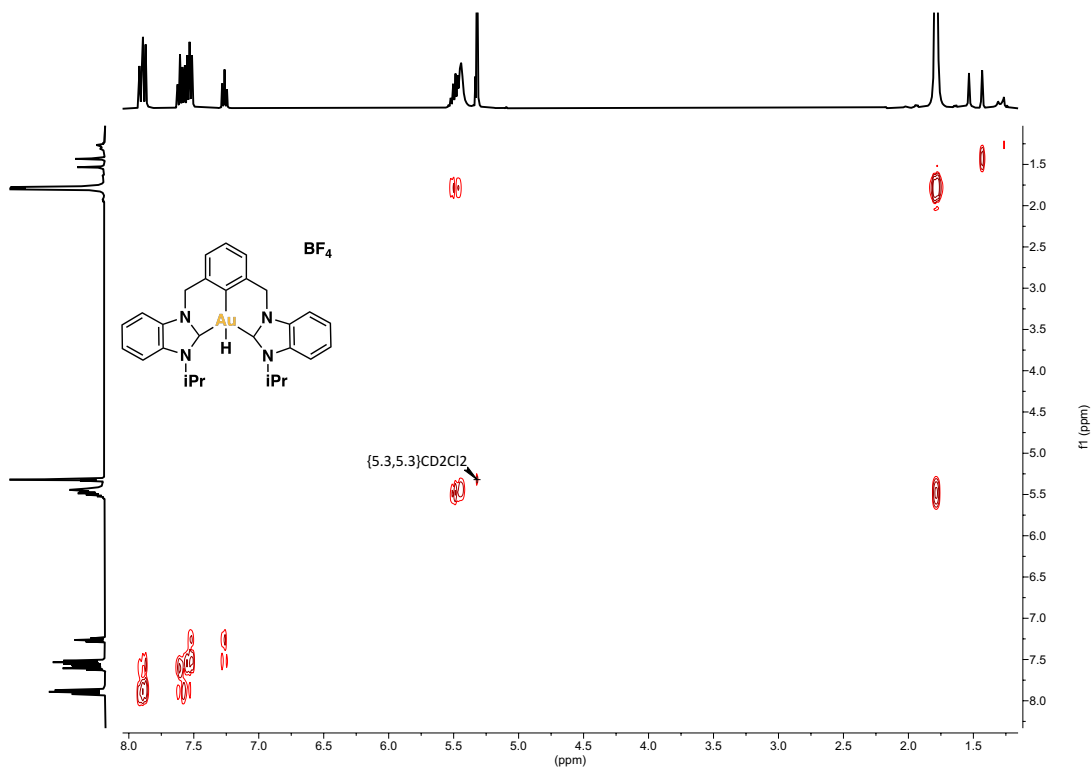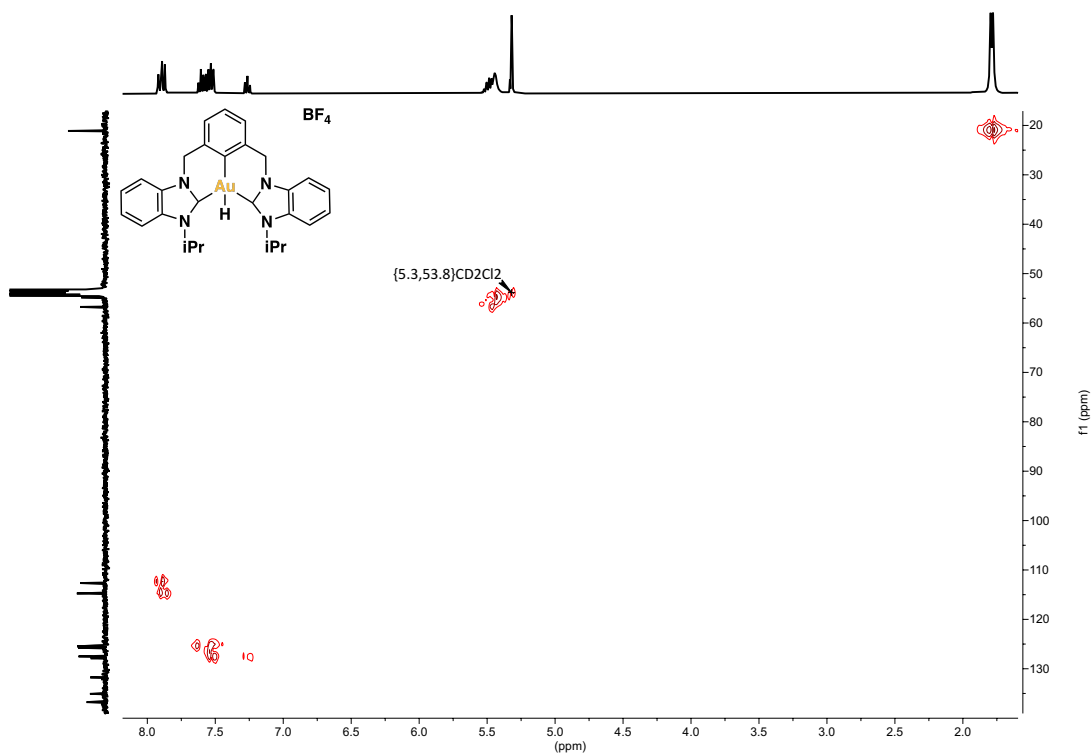

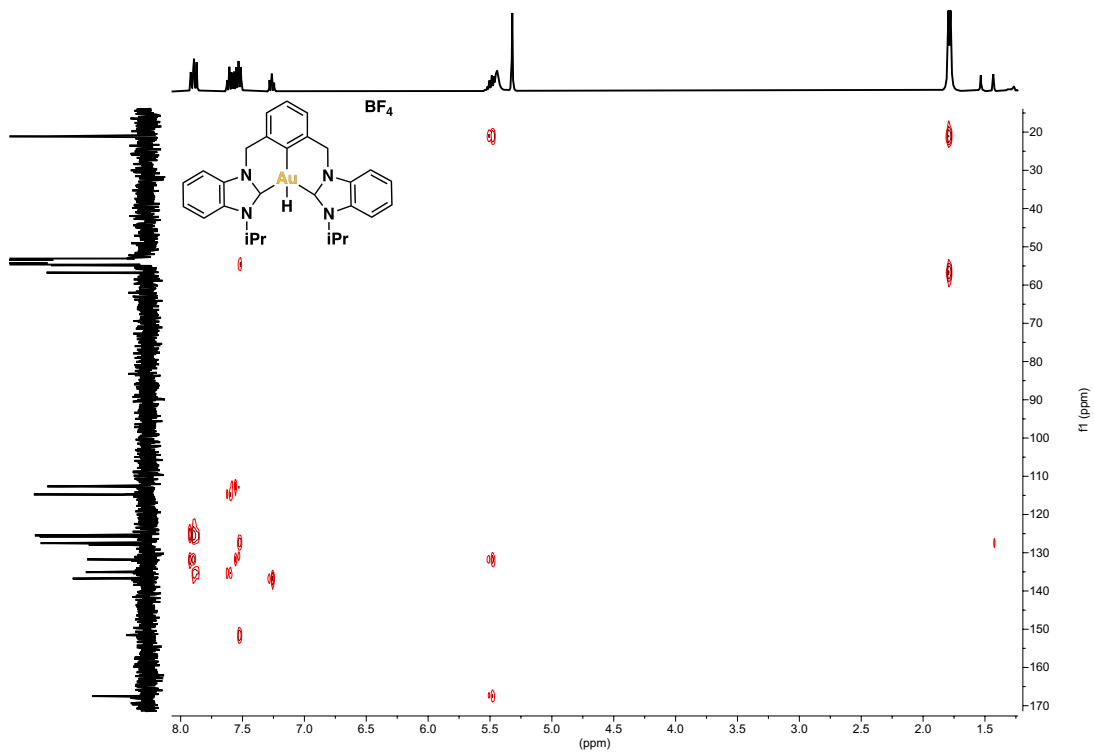

Figure S99.  $^1\text{H}$ ,  $^{13}\text{C}$  HMBC NMR (400MHz, 298K) of **12a** in  $\text{CD}_2\text{Cl}_2$



## 7.18 NMR spectra of complex 13a

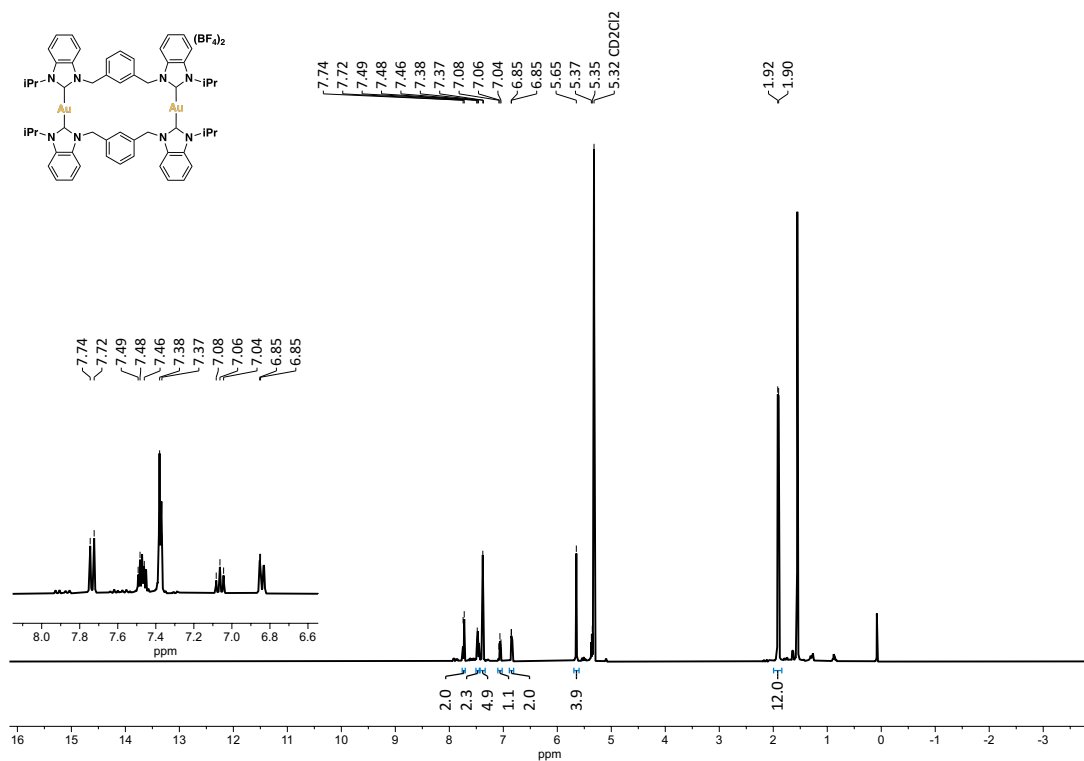

Figure S100.  $^1H$  NMR (400MHz, 298K) of **13a** in  $CD_2Cl_2$

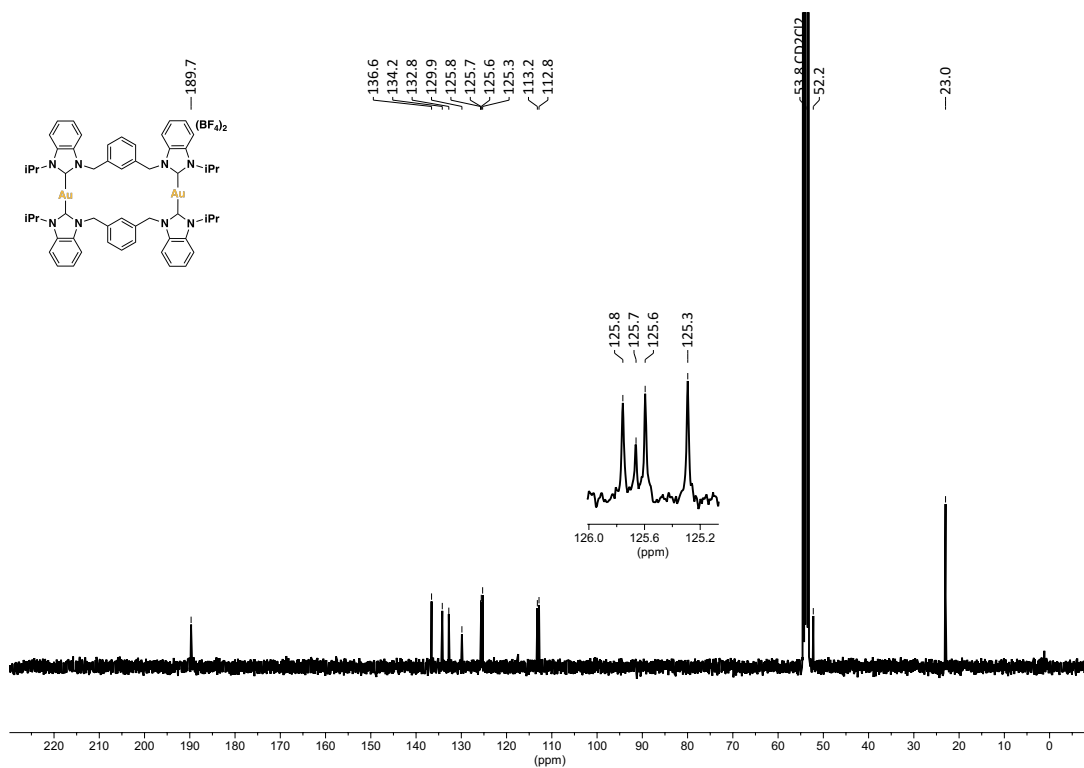

Figure S101.  $^{13}C\{^1H\}$  NMR (101MHz, 298K) of **13a** in  $CD_2Cl_2$

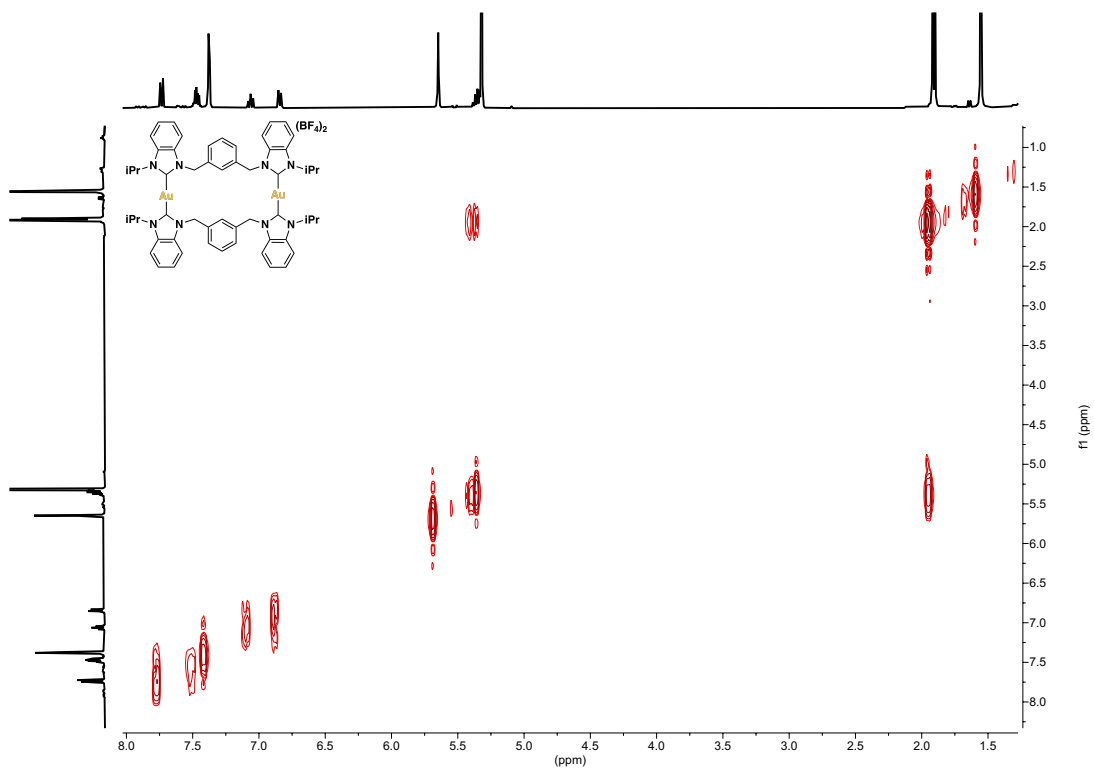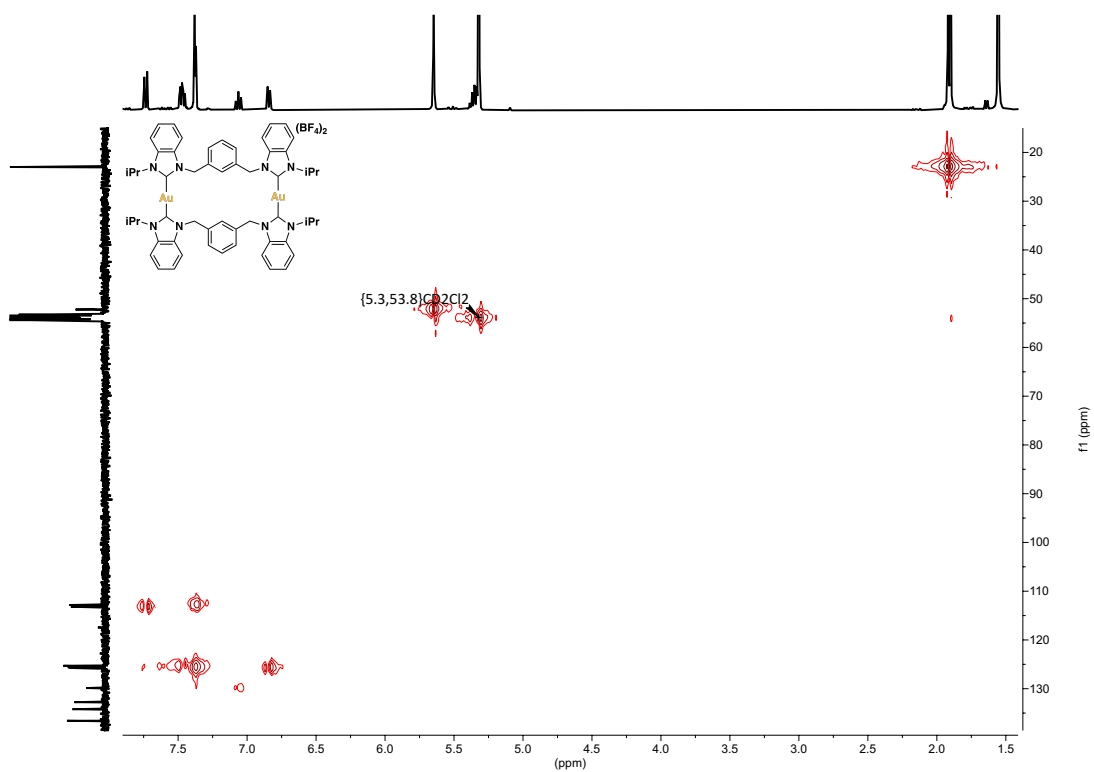

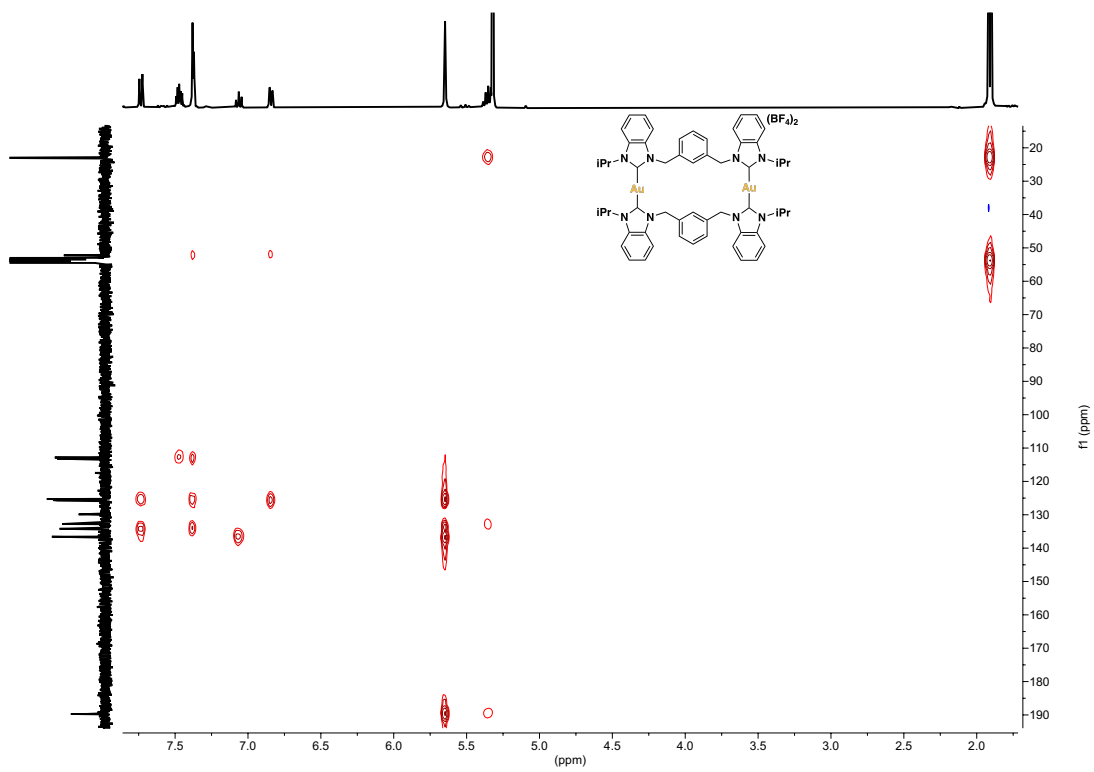

## 8 X-Ray structures and crystallographic data

### 8.1 Compound 5b

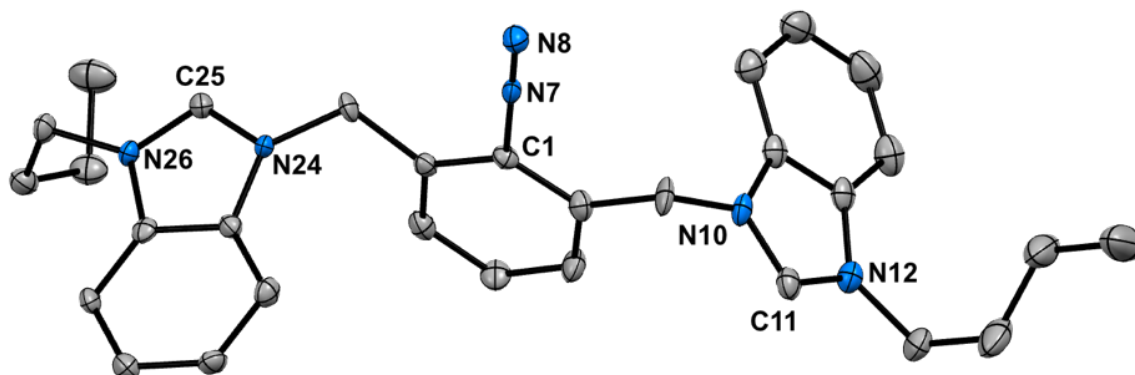

Figure S105. Crystal structure of **5b** (CCDC 2334006). Ellipsoids set at 50% probability; H atoms and  $\text{BF}_4$  counterions were removed for clarity.

Table S1. Crystallographic parameters for compound **5b**

|                               |                                                                  |                            |
|-------------------------------|------------------------------------------------------------------|----------------------------|
| <b>Chemical formula</b>       | $\text{C}_{62}\text{H}_{73}\text{B}_6\text{F}_{24}\text{N}_{13}$ |                            |
| <b>Formula weight</b>         | 1521.19 g/mol                                                    |                            |
| <b>Temperature</b>            | 100(2) K                                                         |                            |
| <b>Wavelength</b>             | 0.71076 Å                                                        |                            |
| <b>Crystal size</b>           | 0.080 x 0.120 x 0.220 mm                                         |                            |
| <b>Crystal habit</b>          | colorless needle                                                 |                            |
| <b>Crystal system</b>         | triclinic                                                        |                            |
| <b>Space group</b>            | P-1                                                              |                            |
| <b>Unit cell dimensions</b>   | $a = 14.84(2)$ Å                                                 | $\alpha = 95.25(4)^\circ$  |
|                               | $b = 15.50(2)$ Å                                                 | $\beta = 99.16(4)^\circ$   |
|                               | $c = 16.50(3)$ Å                                                 | $\gamma = 108.37(3)^\circ$ |
| <b>Volume</b>                 | $3515.(9)$ Å <sup>3</sup>                                        |                            |
| <b>Z</b>                      | 2                                                                |                            |
| <b>Density (calculated)</b>   | 1.438 g/cm <sup>3</sup>                                          |                            |
| <b>Absorption coefficient</b> | 0.130 mm <sup>-1</sup>                                           |                            |
| <b>F(000)</b>                 | 1564                                                             |                            |

A colorless needle-like specimen of  $\text{C}_{62}\text{H}_{73}\text{B}_6\text{F}_{24}\text{N}_{13}$ , approximate dimensions 0.080 mm x 0.120 mm x 0.220 mm, was used for the X-ray crystallographic analysis. The X-ray intensity data were measured on a D8 QUEST ECO three-circle diffractometer system equipped with a Ceramic x-ray tube (Mo  $\text{K}\alpha$ ,  $\lambda = 0.71076$  Å) and a doubly curved silicon crystal Bruker Triumph monochromator. A total of 364 frames were collected. The total exposure time was 10.11 hours. The frames were integrated with the Bruker SAINT software package using

a narrow-frame algorithm. The integration of the data using a triclinic unit cell yielded a total of 33289 reflections to a maximum  $\theta$  angle of  $26.20^\circ$  (0.80 Å resolution), of which 13648 were independent (average redundancy 2.439, completeness = 96.6%,  $R_{\text{int}} = 6.03\%$ ,  $R_{\text{sig}} = 10.16\%$ ) and 7491 (54.89%) were greater than  $2\sigma(F^2)$ . The final cell constants of  $a = 14.84(2)$  Å,  $b = 15.50(2)$  Å,  $c = 16.50(3)$  Å,  $\alpha = 95.25(4)^\circ$ ,  $\beta = 99.16(4)^\circ$ ,  $\gamma = 108.37(3)^\circ$ , volume =  $3515.9(9)$  Å<sup>3</sup>, are based upon the refinement of the XYZ-centroids of 8974 reflections above  $20 \sigma(I)$  with  $5.775^\circ < 2\theta < 52.26^\circ$ . Data were corrected for absorption effects using the Multi-Scan method (SADABS). The ratio of minimum to maximum apparent transmission was 0.818. The calculated minimum and maximum transmission coefficients (based on crystal size) are 0.6097 and 0.7453. The structure was solved and refined using the Bruker SHELXTL Software Package, using the space group  $P \bar{1}$ , with  $Z = 2$  for the formula unit,  $C_{62}H_{73}B_6F_{24}N_{13}$ . The final anisotropic full-matrix least-squares refinement on  $F^2$  with 959 variables converged at  $R1 = 6.68\%$ , for the observed data and  $wR2 = 16.54\%$  for all data. The goodness-of-fit was 1.019. The largest peak in the final difference electron density synthesis was  $0.724 \text{ e}/\text{Å}^3$  and the largest hole was  $-0.400 \text{ e}/\text{Å}^3$  with an RMS deviation of  $0.064 \text{ e}/\text{Å}^3$ . On the basis of the final model, the calculated density was  $1.438 \text{ g}/\text{cm}^3$  and  $F(000)$ ,  $1564 \text{ e}^-$ .

## 8.2 Compound 6a

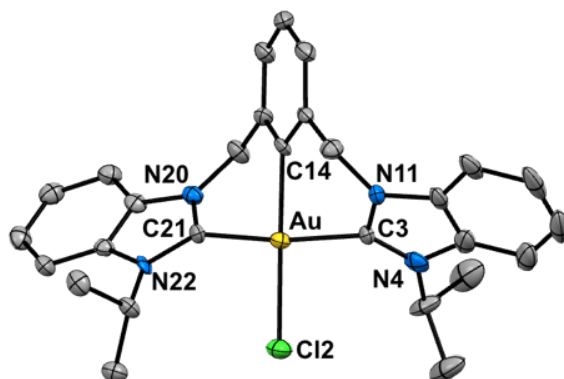

Figure S106. Crystal structure of **6a** (CCDC 2334008). Ellipsoids set at 50% probability; H atoms and  $\text{BF}_4$  counterion were removed for clarity.

Table S2. Crystallographic parameters for compound **6a**.

|                               |                                                                                             |                           |
|-------------------------------|---------------------------------------------------------------------------------------------|---------------------------|
| <b>Chemical formula</b>       | $\text{C}_{62}\text{H}_{70}\text{Au}_2\text{B}_2\text{Cl}_6\text{F}_8\text{N}_{10}\text{O}$ |                           |
| <b>Formula weight</b>         | 1751.53 g/mol                                                                               |                           |
| <b>Temperature</b>            | 100(2) K                                                                                    |                           |
| <b>Wavelength</b>             | 0.71073 Å                                                                                   |                           |
| <b>Crystal size</b>           | 0.040 x 0.090 x 0.160 mm                                                                    |                           |
| <b>Crystal habit</b>          | colorless plate                                                                             |                           |
| <b>Crystal system</b>         | monoclinic                                                                                  |                           |
| <b>Space group</b>            | P 1 21/n 1                                                                                  |                           |
| <b>Unit cell dimensions</b>   | $a = 9.3865(19)$ Å                                                                          | $\alpha = 90^\circ$       |
|                               | $b = 17.981(4)$ Å                                                                           | $\beta = 98.923(6)^\circ$ |
|                               | $c = 20.354(5)$ Å                                                                           | $\gamma = 90^\circ$       |
| <b>Volume</b>                 | $3393.7(13)$ Å <sup>3</sup>                                                                 |                           |
| <b>Z</b>                      | 2                                                                                           |                           |
| <b>Density (calculated)</b>   | 1.714 g/cm <sup>3</sup>                                                                     |                           |
| <b>Absorption coefficient</b> | 4.625 mm <sup>-1</sup>                                                                      |                           |
| <b>F(000)</b>                 | 1724                                                                                        |                           |

A colorless, plate-like specimen of  $\text{C}_{62}\text{H}_{70}\text{Au}_2\text{B}_2\text{Cl}_6\text{F}_8\text{N}_{10}\text{O}$ , approximate dimensions 0.040 mm x 0.090 mm x 0.160 mm, was used for the X-ray crystallographic analysis. The X-ray intensity data were measured on a D8 QUEST ECO three-circle diffractometer system equipped with a Ceramic x-ray tube (Mo  $K\alpha$ ,  $\lambda = 0.71073$  Å) and a doubly curved silicon crystal Bruker Triumph monochromator. A total of 501 frames were collected. The total exposure time was 1.39 hours. The frames were integrated with the Bruker SAINT software package using a narrow-frame algorithm. The integration of the data using a monoclinic unit cell yielded a total of 107683 reflections to a maximum  $\theta$  angle of  $28.33^\circ$  ( $0.75$  Å

resolution), of which 8436 were independent (average redundancy 12.765, completeness = 99.8%,  $R_{\text{int}} = 10.18\%$ ,  $R_{\text{sig}} = 4.52\%$ ) and 6907 (81.88%) were greater than  $2\sigma(F^2)$ . The final cell constants of  $a = 9.3865(19) \text{ \AA}$ ,  $b = 17.981(4) \text{ \AA}$ ,  $c = 20.354(5) \text{ \AA}$ ,  $\beta = 98.923(6)^\circ$ , volume =  $3393.7(13) \text{ \AA}^3$ , are based upon the refinement of the XYZ-centroids of 9884 reflections above  $20 \sigma(I)$  with  $5.077^\circ < 2\theta < 56.19^\circ$ . Data were corrected for absorption effects using the Multi-Scan method (SADABS). The ratio of minimum to maximum apparent transmission was 0.736. The calculated minimum and maximum transmission coefficients (based on crystal size) are 0.5250 and 0.8370. The structure was solved and refined using the Bruker SHELXTL Software Package, using the space group P 1 21/n 1, with  $Z = 2$  for the formula unit,  $\text{C}_{62}\text{H}_{70}\text{Au}_2\text{B}_2\text{Cl}_6\text{F}_8\text{N}_{10}\text{O}$ . The final anisotropic full-matrix least-squares refinement on  $F^2$  with 433 variables converged at  $R1 = 7.15\%$ , for the observed data and  $wR2 = 14.88\%$  for all data. The goodness-of-fit was 1.170. The largest peak in the final difference electron density synthesis was  $1.993 \text{ e}^-/\text{\AA}^3$  and the largest hole was  $-4.131 \text{ e}^-/\text{\AA}^3$  with an RMS deviation of  $0.222 \text{ e}^-/\text{\AA}^3$ . On the basis of the final model, the calculated density was  $1.714 \text{ g/cm}^3$  and  $F(000)$ ,  $1724 \text{ e}^-$ .

### 8.3 Complex 6b

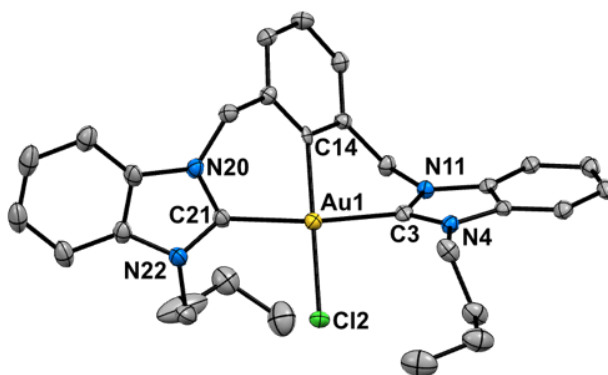

Figure S107. Crystal structure of **6b** (CCDC 2334007). Ellipsoids set at 50% probability; H atoms and  $\text{BF}_4$  counterion were removed for clarity.

Table S3. Crystallographic parameters for compound **6b**

|                               |                                                                          |                              |
|-------------------------------|--------------------------------------------------------------------------|------------------------------|
| <b>Chemical formula</b>       | $\text{C}_{31}\text{H}_{35}\text{AuBCl}_3\text{F}_4\text{N}_4\text{O}_0$ |                              |
| <b>Formula weight</b>         | 853.75 g/mol                                                             |                              |
| <b>Temperature</b>            | 100(2) K                                                                 |                              |
| <b>Wavelength</b>             | 0.71073 Å                                                                |                              |
| <b>Crystal size</b>           | 0.080 x 0.100 x 0.140 mm                                                 |                              |
| <b>Crystal habit</b>          | yellow block                                                             |                              |
| <b>Crystal system</b>         | triclinic                                                                |                              |
| <b>Space group</b>            | P $\bar{1}$                                                              |                              |
| <b>Unit cell dimensions</b>   | $a = 10.0080(4)$ Å                                                       | $\alpha = 86.0800(10)^\circ$ |
|                               | $b = 10.3247(4)$ Å                                                       | $\beta = 89.9980(10)^\circ$  |
|                               | $c = 16.4908(6)$ Å                                                       | $\gamma = 69.3010(10)^\circ$ |
| <b>Volume</b>                 | $1589.73(11)$ Å <sup>3</sup>                                             |                              |
| <b>Z</b>                      | 2                                                                        |                              |
| <b>Density (calculated)</b>   | $1.784$ g/cm <sup>3</sup>                                                |                              |
| <b>Absorption coefficient</b> | $4.932$ mm <sup>-1</sup>                                                 |                              |
| <b>F(000)</b>                 | 840                                                                      |                              |

A yellow block-like specimen of  $\text{C}_{31}\text{H}_{35}\text{AuBCl}_3\text{F}_4\text{N}_4\text{O}_0$ , approximate dimensions 0.080 mm x 0.100 mm x 0.140 mm, was used for the X-ray crystallographic analysis. The X-ray intensity data were measured on a D8 QUEST ECO three-circle diffractometer system equipped with a Ceramic x-ray tube (Mo  $K\alpha$ ,  $\lambda = 0.71073$  Å) and a doubly curved silicon crystal Bruker Triumph monochromator. A total of 1043 frames were collected. The total exposure time was 1.45 hours. The frames were integrated with the Bruker SAINT software package using a narrow-frame algorithm. The integration of the data using a triclinic unit cell yielded a total of 97134 reflections to a maximum  $\theta$  angle of  $27.62^\circ$  (0.77 Å resolution), of which 7327



were independent (average redundancy 13.257, completeness = 99.2%,  $R_{\text{int}} = 7.59\%$ ,  $R_{\text{sig}} = 3.31\%$ ) and 6249 (85.29%) were greater than  $2\sigma(F^2)$ . The final cell constants of  $a = 10.0080(4) \text{ \AA}$ ,  $b = 10.3247(4) \text{ \AA}$ ,  $c = 16.4908(6) \text{ \AA}$ ,  $\alpha = 86.0800(10)^\circ$ ,  $\beta = 89.9980(10)^\circ$ ,  $\gamma = 69.3010(10)^\circ$ , volume =  $1589.73(11) \text{ \AA}^3$ , are based upon the refinement of the XYZ-centroids of 9982 reflections above  $20 \sigma(I)$  with  $5.558^\circ < 2\theta < 54.71^\circ$ . Data were corrected for absorption effects using the Multi-Scan method (SADABS). The ratio of minimum to maximum apparent transmission was 0.821. The calculated minimum and maximum transmission coefficients (based on crystal size) are 0.5450 and 0.6940. The structure was solved and refined using the Bruker SHELXTL Software Package, using the space group P-1, with  $Z = 2$  for the formula unit,  $C_{31}H_{35}AuBCl_3F_4N_4O_0$ . The final anisotropic full-matrix least-squares refinement on  $F^2$  with 407 variables converged at  $R1 = 3.31\%$ , for the observed data and  $wR2 = 8.18\%$  for all data. The goodness-of-fit was 1.172. The largest peak in the final difference electron density synthesis was  $4.965 \text{ e}^-/\text{\AA}^3$  and the largest hole was  $-1.574 \text{ e}^-/\text{\AA}^3$  with an RMS deviation of  $0.168 \text{ e}^-/\text{\AA}^3$ . On the basis of the final model, the calculated density was  $1.784 \text{ g/cm}^3$  and  $F(000)$ , 840  $e^-$ .

## 8.4 Complex 8a

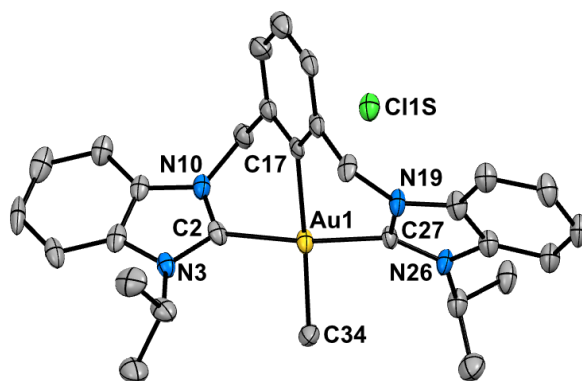

Figure S108. Crystal structure of **8a** (CCDC 2334012). Ellipsoids set at 50% probability; H atoms were removed for clarity.

Table S4. Crystallographic parameters for compound **8a**

|                               |                                                                   |                            |
|-------------------------------|-------------------------------------------------------------------|----------------------------|
| <b>Chemical formula</b>       | C <sub>31</sub> H <sub>35</sub> AuClN <sub>5</sub> O <sub>0</sub> |                            |
| <b>Formula weight</b>         | 710.05 g/mol                                                      |                            |
| <b>Temperature</b>            | 130(2) K                                                          |                            |
| <b>Wavelength</b>             | 0.71076 Å                                                         |                            |
| <b>Crystal size</b>           | 0.050 x 0.120 x 0.130 mm                                          |                            |
| <b>Crystal habit</b>          | colorless prism                                                   |                            |
| <b>Crystal system</b>         | triclinic                                                         |                            |
| <b>Space group</b>            | P $\bar{1}$                                                       |                            |
| <b>Unit cell dimensions</b>   | a = 9.2394(4) Å                                                   | $\alpha = 82.772(3)^\circ$ |
|                               | b = 13.0032(7) Å                                                  | $\beta = 84.032(3)^\circ$  |
|                               | c = 13.1246(7) Å                                                  | $\gamma = 85.266(3)^\circ$ |
| <b>Volume</b>                 | 1551.95(14) Å <sup>3</sup>                                        |                            |
| <b>Z</b>                      | 2                                                                 |                            |
| <b>Density (calculated)</b>   | 1.519 g/cm <sup>3</sup>                                           |                            |
| <b>Absorption coefficient</b> | 4.853 mm <sup>-1</sup>                                            |                            |
| <b>F(000)</b>                 | 704                                                               |                            |

A colorless, prism-like specimen of C<sub>31</sub>H<sub>35</sub>AuClN<sub>5</sub>O<sub>0</sub>, approximate dimensions 0.050 mm x 0.120 mm x 0.130 mm, was used for the X-ray crystallographic analysis. The X-ray intensity data were measured on a D8 QUEST ECO three-circle diffractometer system equipped with a Ceramic x-ray tube (Mo K $\alpha$ ,  $\lambda = 0.71076$  Å) and a doubly curved silicon crystal Bruker Triumph monochromator. A total of 504 frames were collected. The total exposure time was 0.70 hours. The frames were integrated with the Bruker SAINT software package using a narrow-frame algorithm. The integration of the data using a triclinic unit cell yielded a total of 56526 reflections to a maximum  $\theta$  angle of 27.69° (0.76 Å resolution), of which 7206

were independent (average redundancy 7.844, completeness = 99.4%,  $R_{\text{int}} = 11.49\%$ ,  $R_{\text{sig}} = 5.97\%$ ) and 5973 (82.89%) were greater than  $2\sigma(F^2)$ . The final cell constants of  $a = 9.2394(4)$  Å,  $b = 13.0032(7)$  Å,  $c = 13.1246(7)$  Å,  $\alpha = 82.772(3)^\circ$ ,  $\beta = 84.032(3)^\circ$ ,  $\gamma = 85.266(3)^\circ$ , volume =  $1551.95(14)$  Å<sup>3</sup>, are based upon the refinement of the XYZ-centroids of 9071 reflections above  $20 \sigma(I)$  with  $5.271^\circ < 2\theta < 54.78^\circ$ . Data were corrected for absorption effects using the Multi-Scan method (SADABS). The ratio of minimum to maximum apparent transmission was 0.704. The calculated minimum and maximum transmission coefficients (based on crystal size) are 0.5710 and 0.7930. The structure was solved and refined using the Bruker SHELXTL Software Package, using the space group P-1, with  $Z = 2$  for the formula unit,  $C_{31}H_{35}AuClN_5O_0$ . The final anisotropic full-matrix least-squares refinement on  $F^2$  with 349 variables converged at  $R1 = 6.34\%$ , for the observed data and  $wR2 = 16.94\%$  for all data. The goodness-of-fit was 1.136. The largest peak in the final difference electron density synthesis was  $8.413 \text{ e}^-/\text{Å}^3$  and the largest hole was  $-2.003 \text{ e}^-/\text{Å}^3$  with an RMS deviation of  $0.260 \text{ e}^-/\text{Å}^3$ . On the basis of the final model, the calculated density was  $1.519 \text{ g/cm}^3$  and  $F(000)$ , 704  $e^-$ .

## 8.5 Complex 8b

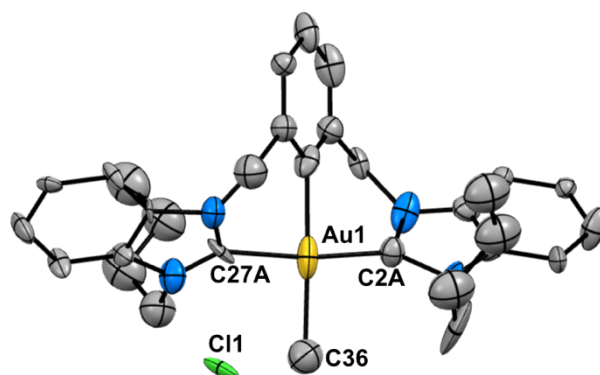

Figure S109. Crystal structure of **8b** (CCDC 2334004). Ellipsoids set at 50% probability; H atoms and  $\text{BF}_4$  counterions were removed for clarity.

Table S5. Crystallographic parameters for compound **8b**

|                               |                                            |                      |
|-------------------------------|--------------------------------------------|----------------------|
| <b>Chemical formula</b>       | $\text{C}_{31}\text{H}_{35}\text{AuClN}_4$ |                      |
| <b>Formula weight</b>         | 696.04 g/mol                               |                      |
| <b>Temperature</b>            | 100(2) K                                   |                      |
| <b>Wavelength</b>             | 0.71073 Å                                  |                      |
| <b>Crystal size</b>           | 0.060 x 0.080 x 0.300 mm                   |                      |
| <b>Crystal habit</b>          | colorless needle                           |                      |
| <b>Crystal system</b>         | trigonal                                   |                      |
| <b>Space group</b>            | P 31                                       |                      |
| <b>Unit cell dimensions</b>   | $a = 18.1457(11)$ Å                        | $\alpha = 90^\circ$  |
|                               | $b = 18.1457(11)$ Å                        | $\beta = 90^\circ$   |
|                               | $c = 10.1390(9)$ Å                         | $\gamma = 120^\circ$ |
| <b>Volume</b>                 | $2891.2(4)$ Å <sup>3</sup>                 |                      |
| <b>Z</b>                      | 3                                          |                      |
| <b>Density (calculated)</b>   | 1.199 g/cm <sup>3</sup>                    |                      |
| <b>Absorption coefficient</b> | 3.905 mm <sup>-1</sup>                     |                      |
| <b>F(000)</b>                 | 1035                                       |                      |

A colorless, needle-like specimen of  $\text{C}_{31}\text{H}_{35}\text{AuClN}_4$ , approximate dimensions 0.060 mm x 0.080 mm x 0.300 mm, was used for the X-ray crystallographic analysis. The X-ray intensity data were measured on a D8 QUEST ECO three-circle diffractometer system equipped with a Ceramic x-ray tube (Mo  $K\alpha$ ,  $\lambda = 0.71073$  Å) and a doubly curved silicon crystal Bruker Triumph monochromator. A total of 1986 frames were collected. The total exposure time was 2.06 hours. The frames were integrated with the Bruker SAINT software package using a narrow-frame algorithm. The integration of the data using a trigonal unit cell yielded a total of 21282 reflections to a maximum  $\theta$  angle of 23.83° (0.88 Å resolution), of which 5955

were independent (average redundancy 3.574, completeness = 99.9%,  $R_{\text{int}} = 7.87\%$ ,  $R_{\text{sig}} = 9.01\%$ ) and 4312 (72.41%) were greater than  $2\sigma(F^2)$ . The final cell constants of  $a = 18.1457(11) \text{ \AA}$ ,  $b = 18.1457(11) \text{ \AA}$ ,  $c = 10.1390(9) \text{ \AA}$ , volume =  $2891.2(4) \text{ \AA}^3$ , are based upon the refinement of the XYZ-centroids of 4839 reflections above  $20 \sigma(I)$  with  $6.026^\circ < 2\theta < 45.91^\circ$ . The ratio of minimum to maximum apparent transmission was 0.705. The calculated minimum and maximum transmission coefficients (based on crystal size) are 0.3870 and 0.7990. The structure was solved and refined using the Bruker SHELXTL Software Package, using the space group P 31, with  $Z = 3$  for the formula unit,  $\text{C}_{31}\text{H}_{35}\text{AuClN}_4$ . The final anisotropic full-matrix least-squares refinement on  $F^2$  with 270 variables converged at  $R1 = 7.86\%$ , for the observed data and  $wR2 = 20.95\%$  for all data. The goodness-of-fit was 1.057. The largest peak in the final difference electron density synthesis was  $1.367 \text{ e}^-/\text{\AA}^3$  and the largest hole was  $-0.882 \text{ e}^-/\text{\AA}^3$  with an RMS deviation of  $0.173 \text{ e}^-/\text{\AA}^3$ . On the basis of the final model, the calculated density was  $1.199 \text{ g/cm}^3$  and  $F(000), 1035 \text{ e}^-$ .

## 8.6 Complex 9a

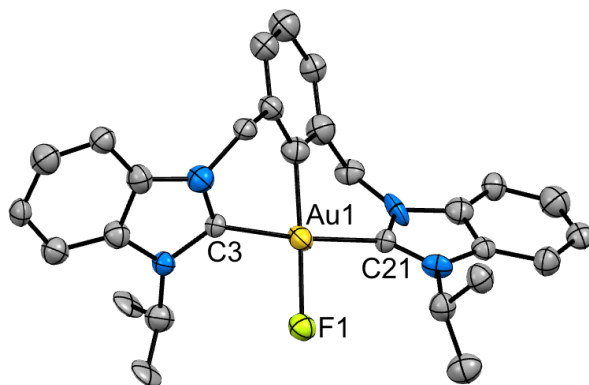

Figure S110. Crystal structure of **9a** (CCDC 2334005). Ellipsoids set at 50% probability; H atoms and BF<sub>4</sub> counterions were removed for clarity.

Table S6. Crystallographic parameters for compound **9a**

|                               |                                                                                                               |                 |
|-------------------------------|---------------------------------------------------------------------------------------------------------------|-----------------|
| <b>Chemical formula</b>       | C <sub>57</sub> H <sub>60</sub> Au <sub>2</sub> B <sub>2</sub> Cl <sub>2</sub> F <sub>10</sub> N <sub>8</sub> |                 |
| <b>Formula weight</b>         | 1533.58 g/mol                                                                                                 |                 |
| <b>Temperature</b>            | 100(2) K                                                                                                      |                 |
| <b>Wavelength</b>             | 0.71073 Å                                                                                                     |                 |
| <b>Crystal size</b>           | 0.010 x 0.050 x 0.190 mm                                                                                      |                 |
| <b>Crystal habit</b>          | colorless needle                                                                                              |                 |
| <b>Crystal system</b>         | monoclinic                                                                                                    |                 |
| <b>Space group</b>            | P 1 21/c 1                                                                                                    |                 |
| <b>Unit cell dimensions</b>   | a = 19.539(8) Å                                                                                               | α = 90°         |
|                               | b = 10.181(4) Å                                                                                               | β = 97.270(10)° |
|                               | c = 28.551(11) Å                                                                                              | γ = 90°         |
| <b>Volume</b>                 | 5634.(4) Å <sup>3</sup>                                                                                       |                 |
| <b>Z</b>                      | 4                                                                                                             |                 |
| <b>Density (calculated)</b>   | 1.808 g/cm <sup>3</sup>                                                                                       |                 |
| <b>Absorption coefficient</b> | 5.377 mm <sup>-1</sup>                                                                                        |                 |
| <b>F(000)</b>                 | 3000                                                                                                          |                 |

A colorless, needle-like specimen of C<sub>57</sub>H<sub>60</sub>Au<sub>2</sub>B<sub>2</sub>Cl<sub>2</sub>F<sub>10</sub>N<sub>8</sub>, approximate dimensions 0.010 mm x 0.050 mm x 0.190 mm, was used for the X-ray crystallographic analysis. The X-ray intensity data were measured on a D8 QUEST ECO three-circle diffractometer system equipped with a Ceramic x-ray tube (Mo Kα, λ = 0.71073 Å) and a doubly curved silicon crystal Bruker Triumph monochromator. A total of 216 frames were collected. The total exposure time was 7.20 hours. The frames were integrated with the Bruker SAINT software package using a narrow-frame algorithm. The integration of the data using a monoclinic unit cell yielded a total of 48771 reflections to a maximum θ angle of 23.38° (0.90 Å

resolution), of which 8159 were independent (average redundancy 5.978, completeness = 99.2%,  $R_{\text{int}} = 27.72\%$ ,  $R_{\text{sig}} = 15.33\%$ ) and 4970 (60.91%) were greater than  $2\sigma(F^2)$ . The final cell constants of  $a = 19.539(8) \text{ \AA}$ ,  $b = 10.181(4) \text{ \AA}$ ,  $c = 28.551(11) \text{ \AA}$ ,  $\beta = 97.270(10)^\circ$ , volume =  $5634.4(4) \text{ \AA}^3$ , are based upon the refinement of the XYZ-centroids of 4066 reflections above  $20 \sigma(I)$  with  $4.928^\circ < 2\theta < 46.03^\circ$ . Data were corrected for absorption effects using the Multi-Scan method (SADABS). The ratio of minimum to maximum apparent transmission was 0.450. The calculated minimum and maximum transmission coefficients (based on crystal size) are 0.4280 and 0.9480. The structure was solved and refined using the Bruker SHELXTL Software Package, using the space group P 1 21/c 1, with  $Z = 4$  for the formula unit,  $\text{C}_{57}\text{H}_{60}\text{Au}_2\text{B}_2\text{Cl}_2\text{F}_{10}\text{N}_8$ . The final anisotropic full-matrix least-squares refinement on  $F^2$  with 702 variables converged at  $R1 = 11.75\%$ , for the observed data and  $wR2 = 28.76\%$  for all data. The goodness-of-fit was 1.140. The largest peak in the final difference electron density synthesis was  $1.863 \text{ e}^-/\text{\AA}^3$  and the largest hole was  $-3.594 \text{ e}^-/\text{\AA}^3$  with an RMS deviation of  $0.300 \text{ e}^-/\text{\AA}^3$ . On the basis of the final model, the calculated density was  $1.808 \text{ g/cm}^3$  and  $F(000)$ , 3000  $\text{e}^-$ .

## 8.7 Complex 9b

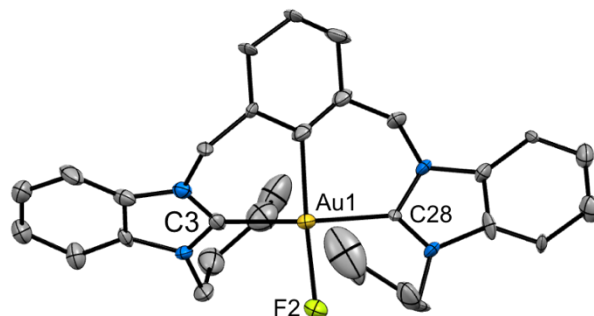

Figure S111. Crystal structure of **9b** (CCDC 2334010). Ellipsoids set at 50% probability; H atoms and  $\text{BF}_4$  counterions were removed for clarity.

Table S7. Crystallographic parameters for compound **9b**

|                               |                                                                |                     |
|-------------------------------|----------------------------------------------------------------|---------------------|
| <b>Chemical formula</b>       | $\text{C}_{31}\text{H}_{35}\text{AuBCl}_2\text{F}_5\text{N}_4$ |                     |
| <b>Formula weight</b>         | 837.30 g/mol                                                   |                     |
| <b>Temperature</b>            | 100(2) K                                                       |                     |
| <b>Wavelength</b>             | 0.71073 Å                                                      |                     |
| <b>Crystal size</b>           | 0.040 x 0.080 x 0.300 mm                                       |                     |
| <b>Crystal habit</b>          | colorless needle                                               |                     |
| <b>Crystal system</b>         | orthorhombic                                                   |                     |
| <b>Space group</b>            | P n a 21                                                       |                     |
| <b>Unit cell dimensions</b>   | $a = 19.7358(14)$ Å                                            | $\alpha = 90^\circ$ |
|                               | $b = 17.0365(14)$ Å                                            | $\beta = 90^\circ$  |
|                               | $c = 18.6880(14)$ Å                                            | $\gamma = 90^\circ$ |
| <b>Volume</b>                 | $6283.4(8)$ Å <sup>3</sup>                                     |                     |
| <b>Z</b>                      | 8                                                              |                     |
| <b>Density (calculated)</b>   | 1.770 g/cm <sup>3</sup>                                        |                     |
| <b>Absorption coefficient</b> | 4.912 mm <sup>-1</sup>                                         |                     |
| <b>F(000)</b>                 | 3296                                                           |                     |

A colorless, needle-like specimen of  $\text{C}_{31}\text{H}_{35}\text{AuBCl}_2\text{F}_5\text{N}_4$ , approximate dimensions 0.040 mm x 0.080 mm x 0.300 mm, was used for the X-ray crystallographic analysis. The X-ray intensity data were measured on a D8 QUEST ECO three-circle diffractometer system equipped with a Ceramic x-ray tube (Mo  $K\alpha$ ,  $\lambda = 0.71073$  Å) and a doubly curved silicon crystal Bruker Triumph monochromator. A total of 604 frames were collected. The total exposure time was 1.23 hours. The frames were integrated with the Bruker SAINT software package using a narrow-frame algorithm. The integration of the data using an orthorhombic unit cell yielded a total of 153731 reflections to a maximum  $\theta$  angle of  $27.51^\circ$



(0.77 Å resolution), of which 14419 were independent (average redundancy 10.662, completeness = 99.8%,  $R_{\text{int}} = 16.82\%$ ,  $R_{\text{sig}} = 7.45\%$ ) and 10602 (73.53%) were greater than  $2\sigma(F^2)$ . The final cell constants of  $a = 19.7358(14)$  Å,  $b = 17.0365(14)$  Å,  $c = 18.6880(14)$  Å, volume = 6283.4(8) Å<sup>3</sup>, are based upon the refinement of the XYZ-centroids of 9983 reflections above  $20 \sigma(I)$  with  $5.245^\circ < 2\theta < 53.29^\circ$ . Data were corrected for absorption effects using the Multi-Scan method (SADABS). The ratio of minimum to maximum apparent transmission was 0.601. The calculated minimum and maximum transmission coefficients (based on crystal size) are 0.3200 and 0.8280. The structure was solved and refined using the Bruker SHELXTL Software Package, using the space group  $Pn\bar{a}2_1$ , with  $Z = 8$  for the formula unit,  $C_{31}H_{35}AuBCl_2F_5N_4$ . The final anisotropic full-matrix least-squares refinement on  $F^2$  with 788 variables converged at  $R1 = 5.37\%$ , for the observed data and  $wR2 = 10.78\%$  for all data. The goodness-of-fit was 1.085. The largest peak in the final difference electron density synthesis was  $1.708 \text{ e}^-/\text{Å}^3$  and the largest hole was  $-3.399 \text{ e}^-/\text{Å}^3$  with an RMS deviation of  $0.194 \text{ e}^-/\text{Å}^3$ . On the basis of the final model, the calculated density was  $1.770 \text{ g/cm}^3$  and  $F(000)$ , 3296  $e^-$ .

## 8.8 Complex 10a

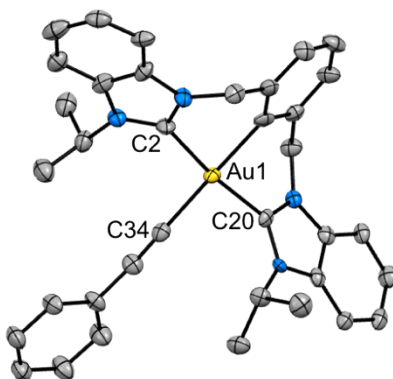

Figure S112. Crystal structure of **10a** (CCDC 2334013). Ellipsoids set at 50% probability; H atoms and BF<sub>4</sub> counterions were removed for clarity.

Table S8. Crystallographic parameters for compound **10a**

|                               |                                                                                  |                            |
|-------------------------------|----------------------------------------------------------------------------------|----------------------------|
| <b>Chemical formula</b>       | C <sub>37</sub> H <sub>36</sub> AuBCl <sub>2</sub> F <sub>4</sub> N <sub>4</sub> |                            |
| <b>Formula weight</b>         | 891.37 g/mol                                                                     |                            |
| <b>Temperature</b>            | 100(2) K                                                                         |                            |
| <b>Wavelength</b>             | 0.71073 Å                                                                        |                            |
| <b>Crystal size</b>           | 0.050 x 0.130 x 0.300 mm                                                         |                            |
| <b>Crystal habit</b>          | colorless plate                                                                  |                            |
| <b>Crystal system</b>         | triclinic                                                                        |                            |
| <b>Space group</b>            | P $\bar{1}$                                                                      |                            |
| <b>Unit cell dimensions</b>   | a = 9.5527(12) Å                                                                 | $\alpha = 77.893(3)^\circ$ |
|                               | b = 13.7464(17) Å                                                                | $\beta = 80.575(3)^\circ$  |
|                               | c = 14.2095(15) Å                                                                | $\gamma = 80.828(3)^\circ$ |
| <b>Volume</b>                 | 1784.6(4) Å <sup>3</sup>                                                         |                            |
| <b>Z</b>                      | 2                                                                                |                            |
| <b>Density (calculated)</b>   | 1.659 g/cm <sup>3</sup>                                                          |                            |
| <b>Absorption coefficient</b> | 4.325 mm <sup>-1</sup>                                                           |                            |
| <b>F(000)</b>                 | 880                                                                              |                            |

A colorless, plate-like specimen of C<sub>37</sub>H<sub>36</sub>AuBCl<sub>2</sub>F<sub>4</sub>N<sub>4</sub>, approximate dimensions 0.050 mm x 0.130 mm x 0.300 mm, was used for the X-ray crystallographic analysis. The X-ray intensity data were measured on a D8 QUEST ECO three-circle diffractometer system equipped with a Ceramic x-ray tube (Mo K $\alpha$ ,  $\lambda = 0.71073$  Å) and a doubly curved silicon crystal Bruker Triumph monochromator. A total of 583 frames were collected. The total exposure time was 3.24 hours. The frames were integrated with the Bruker SAINT software package using a narrow-frame algorithm. The integration of the data using a triclinic unit cell yielded a total of 54188 reflections to a maximum  $\theta$  angle of 26.48° (0.80 Å resolution), of which 7338

were independent (average redundancy 7.385, completeness = 99.5%,  $R_{\text{int}} = 15.30\%$ ,  $R_{\text{sig}} = 8.79\%$ ) and 5967 (81.32%) were greater than  $2\sigma(F^2)$ . The final cell constants of  $a = 9.5527(12) \text{ \AA}$ ,  $b = 13.7464(17) \text{ \AA}$ ,  $c = 14.2095(15) \text{ \AA}$ ,  $\alpha = 77.893(3)^\circ$ ,  $\beta = 80.575(3)^\circ$ ,  $\gamma = 80.828(3)^\circ$ , volume =  $1784.6(4) \text{ \AA}^3$ , are based upon the refinement of the XYZ-centroids of 5770 reflections above  $20 \sigma(I)$  with  $6.114^\circ < 2\theta < 52.49^\circ$ . Data were corrected for absorption effects using the Multi-Scan method (SADABS). The ratio of minimum to maximum apparent transmission was 0.770. The calculated minimum and maximum transmission coefficients (based on crystal size) are 0.3570 and 0.8130. The structure was solved and refined using the Bruker SHELXTL Software Package, using the space group  $P -1$ , with  $Z = 2$  for the formula unit,  $\text{C}_{37}\text{H}_{36}\text{AuBCl}_2\text{F}_4\text{N}_4$ . The final anisotropic full-matrix least-squares refinement on  $F^2$  with 491 variables converged at  $R1 = 6.31\%$ , for the observed data and  $wR2 = 12.77\%$  for all data. The goodness-of-fit was 1.066. The largest peak in the final difference electron density synthesis was  $1.721 \text{ e}^-/\text{\AA}^3$  and the largest hole was  $-3.241 \text{ e}^-/\text{\AA}^3$  with an RMS deviation of  $0.204 \text{ e}^-/\text{\AA}^3$ . On the basis of the final model, the calculated density was  $1.659 \text{ g/cm}^3$  and  $F(000)$ , 880  $\text{e}^-$ .

## 8.9 Complex 11a

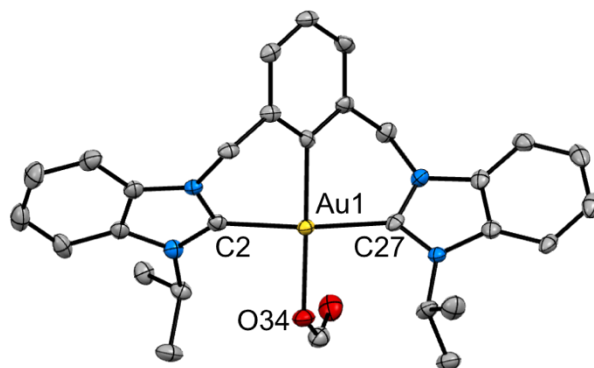

Figure S113. Crystal structure of **11a** (CCDC 2334009). Ellipsoids set at 50% probability; H atoms and BF<sub>4</sub> counterions were removed for clarity.

Table S9. Crystallographic parameters for compound **11a**

|                               |                                                                                 |                |
|-------------------------------|---------------------------------------------------------------------------------|----------------|
| <b>Chemical formula</b>       | C <sub>29</sub> H <sub>30</sub> AuBF <sub>4</sub> N <sub>4</sub> O <sub>2</sub> |                |
| <b>Formula weight</b>         | 750.34 g/mol                                                                    |                |
| <b>Temperature</b>            | 100(2) K                                                                        |                |
| <b>Wavelength</b>             | 0.71073 Å                                                                       |                |
| <b>Crystal size</b>           | 0.060 x 0.080 x 0.220 mm                                                        |                |
| <b>Crystal habit</b>          | colorless prism                                                                 |                |
| <b>Crystal system</b>         | monoclinic                                                                      |                |
| <b>Space group</b>            | P 1 21/n 1                                                                      |                |
| <b>Unit cell dimensions</b>   | a = 13.4261(12) Å                                                               | α = 90°        |
|                               | b = 12.5589(9) Å                                                                | β = 90.397(3)° |
|                               | c = 16.0123(13) Å                                                               | γ = 90°        |
| <b>Volume</b>                 | 2699.9(4) Å <sup>3</sup>                                                        |                |
| <b>Z</b>                      | 4                                                                               |                |
| <b>Density (calculated)</b>   | 1.846 g/cm <sup>3</sup>                                                         |                |
| <b>Absorption coefficient</b> | 5.513 mm <sup>-1</sup>                                                          |                |
| <b>F(000)</b>                 | 1472                                                                            |                |

A colorless, prism-like specimen of C<sub>29</sub>H<sub>30</sub>AuBF<sub>4</sub>N<sub>4</sub>O<sub>2</sub>, approximate dimensions 0.060 mm x 0.080 mm x 0.220 mm, was used for the X-ray crystallographic analysis. The X-ray intensity data were measured on a D8 QUEST ECO three-circle diffractometer system equipped with a Ceramic x-ray tube (Mo Kα, λ = 0.71073 Å) and a doubly curved silicon crystal Bruker Triumph monochromator. A total of 704 frames were collected. The total exposure time was 0.59 hours. The frames were integrated with the Bruker SAINT software package using a narrow-frame algorithm. The integration of the data using a monoclinic unit cell yielded a total of 129169 reflections to a maximum θ angle of 27.59° (0.77 Å resolution), of which

6241 were independent (average redundancy 20.697, completeness = 99.7%,  $R_{\text{int}} = 13.70\%$ ,  $R_{\text{sig}} = 4.53\%$ ) and 4746 (76.05%) were greater than  $2\sigma(F^2)$ . The final cell constants of  $a = 13.4261(12) \text{ \AA}$ ,  $b = 12.5589(9) \text{ \AA}$ ,  $c = 16.0123(13) \text{ \AA}$ ,  $\beta = 90.397(3)^\circ$ , volume =  $2699.9(4) \text{ \AA}^3$ , are based upon the refinement of the XYZ-centroids of 9992 reflections above  $20 \sigma(I)$  with  $5.088^\circ < 2\theta < 54.31^\circ$ . Data were corrected for absorption effects using the Multi-Scan method (SADABS). The ratio of minimum to maximum apparent transmission was 0.745. The calculated minimum and maximum transmission coefficients (based on crystal size) are 0.3770 and 0.7330. The structure was solved and refined using the Bruker SHELXTL Software Package, using the space group P 1 21/n 1, with  $Z = 4$  for the formula unit,  $\text{C}_{29}\text{H}_{30}\text{AuBF}_4\text{N}_4\text{O}_2$ . The final anisotropic full-matrix least-squares refinement on  $F^2$  with 374 variables converged at  $R1 = 3.03\%$ , for the observed data and  $wR2 = 6.46\%$  for all data. The goodness-of-fit was 1.047. The largest peak in the final difference electron density synthesis was  $0.963 \text{ e}^-/\text{\AA}^3$  and the largest hole was  $-1.229 \text{ e}^-/\text{\AA}^3$  with an RMS deviation of  $0.156 \text{ e}^-/\text{\AA}^3$ . On the basis of the final model, the calculated density was  $1.846 \text{ g/cm}^3$  and  $F(000)$ ,  $1472 \text{ e}^-$ .

## 8.10 Complex 12a

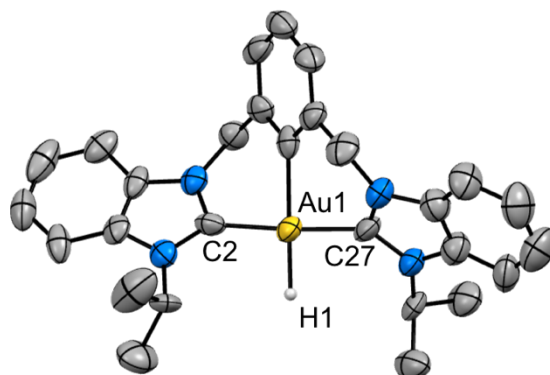

Figure S114. Crystal structure of **12a** (CCDC 2334011). Ellipsoids set at 50% probability; H atoms and BF<sub>4</sub> counterions were removed for clarity.

Table S10. Crystallographic parameters for compound **12a**

|                               |                                                                  |                       |
|-------------------------------|------------------------------------------------------------------|-----------------------|
| <b>Chemical formula</b>       | C <sub>28</sub> H <sub>30</sub> AuBF <sub>4</sub> N <sub>4</sub> |                       |
| <b>Formula weight</b>         | 706.33 g/mol                                                     |                       |
| <b>Temperature</b>            | 307(2) K                                                         |                       |
| <b>Wavelength</b>             | 0.71073 Å                                                        |                       |
| <b>Crystal size</b>           | 0.040 x 0.070 x 0.130 mm                                         |                       |
| <b>Crystal habit</b>          | colorless block                                                  |                       |
| <b>Crystal system</b>         | triclinic                                                        |                       |
| <b>Space group</b>            | P $\bar{1}$                                                      |                       |
| <b>Unit cell dimensions</b>   | a = 9.2528(6) Å                                                  | $\alpha$ = 90.162(2)° |
|                               | b = 16.3004(10) Å                                                | $\beta$ = 95.521(3)°  |
|                               | c = 18.1706(10) Å                                                | $\gamma$ = 95.260(3)° |
| <b>Volume</b>                 | 2716.2(3) Å <sup>3</sup>                                         |                       |
| <b>Z</b>                      | 4                                                                |                       |
| <b>Density (calculated)</b>   | 1.727 g/cm <sup>3</sup>                                          |                       |
| <b>Absorption coefficient</b> | 5.468 mm <sup>-1</sup>                                           |                       |
| <b>F(000)</b>                 | 1384                                                             |                       |

A colorless, block-like specimen of C<sub>28</sub>H<sub>30</sub>AuBF<sub>4</sub>N<sub>4</sub>, approximate dimensions 0.040 mm x 0.070 mm x 0.130 mm, was used for the X-ray crystallographic analysis. The X-ray intensity data were measured on a D8 QUEST ECO three-circle diffractometer system equipped with a Ceramic x-ray tube (Mo K $\alpha$ ,  $\lambda$  = 0.71073 Å) and a doubly curved silicon crystal Bruker Triumph monochromator. A total of 703 frames were collected. The total exposure time was 1.95 hours. The frames were integrated with the Bruker SAINT software package using a narrow-frame algorithm. The integration of the data using a triclinic unit cell yielded a total of 71663 reflections to a maximum  $\theta$  angle of 23.50° (0.89 Å resolution), of which 8026

were independent (average redundancy 8.929, completeness = 99.8%,  $R_{\text{int}} = 10.82\%$ ,  $R_{\text{sig}} = 5.45\%$ ) and 5706 (71.09%) were greater than  $2\sigma(F^2)$ . The final cell constants of  $a = 9.2528(6)$  Å,  $b = 16.3004(10)$  Å,  $c = 18.1706(10)$  Å,  $\alpha = 90.162(2)^\circ$ ,  $\beta = 95.521(3)^\circ$ ,  $\gamma = 95.260(3)^\circ$ , volume =  $2716.2(3)$  Å<sup>3</sup>, are based upon the refinement of the XYZ-centroids of 9281 reflections above  $20 \sigma(I)$  with  $5.019^\circ < 2\theta < 53.88^\circ$ . Data were corrected for absorption effects using the Multi-Scan method (SADABS). The ratio of minimum to maximum apparent transmission was 0.785. The calculated minimum and maximum transmission coefficients (based on crystal size) are 0.5370 and 0.8110. The structure was solved and refined using the Bruker SHELXTL Software Package, using the space group  $P \bar{1}$ , with  $Z = 4$  for the formula unit,  $C_{28}H_{30}AuBF_4N_4$ . The final anisotropic full-matrix least-squares refinement on  $F^2$  with 679 variables converged at  $R1 = 6.30\%$ , for the observed data and  $wR2 = 13.46\%$  for all data. The goodness-of-fit was 1.127. The largest peak in the final difference electron density synthesis was  $1.758 \text{ e}^-/\text{Å}^3$  and the largest hole was  $-1.364 \text{ e}^-/\text{Å}^3$  with an RMS deviation of  $0.148 \text{ e}^-/\text{Å}^3$ . On the basis of the final model, the calculated density was  $1.727 \text{ g/cm}^3$  and  $F(000)$ , 1384  $e^-$ .

## 8.11 Complex 13a

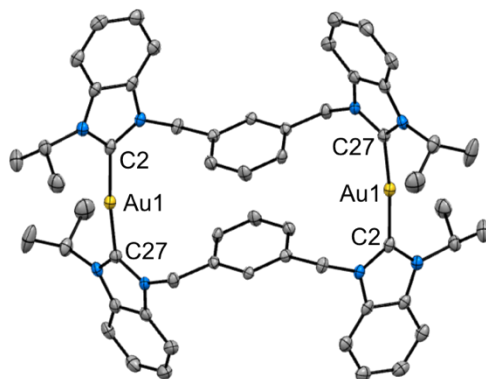

Figure S115. Crystal structure of **13a** (CCDC 2334014). Ellipsoids set at 50% probability; H atoms and  $\text{BF}_4$  counterions were removed for clarity.

Table S11. Crystallographic parameters for compound **13a**

|                               |                                                                                     |                            |
|-------------------------------|-------------------------------------------------------------------------------------|----------------------------|
| <b>Chemical formula</b>       | $\text{C}_{62}\text{H}_{72}\text{Au}_2\text{B}_2\text{Cl}_{12}\text{F}_8\text{N}_8$ |                            |
| <b>Formula weight</b>         | 1922.22 g/mol                                                                       |                            |
| <b>Temperature</b>            | 100(2) K                                                                            |                            |
| <b>Wavelength</b>             | 0.71073 Å                                                                           |                            |
| <b>Crystal size</b>           | 0.050 x 0.120 x 0.240 mm                                                            |                            |
| <b>Crystal habit</b>          | colorless plate                                                                     |                            |
| <b>Crystal system</b>         | triclinic                                                                           |                            |
| <b>Space group</b>            | P $\bar{1}$                                                                         |                            |
| <b>Unit cell dimensions</b>   | $a = 10.5400(13)$ Å                                                                 | $\alpha = 87.440(4)^\circ$ |
|                               | $b = 13.2869(19)$ Å                                                                 | $\beta = 88.406(4)^\circ$  |
|                               | $c = 13.5269(18)$ Å                                                                 | $\gamma = 74.202(4)^\circ$ |
| <b>Volume</b>                 | $1820.7(4)$ Å <sup>3</sup>                                                          |                            |
| <b>Z</b>                      | 1                                                                                   |                            |
| <b>Density (calculated)</b>   | 1.753 g/cm <sup>3</sup>                                                             |                            |
| <b>Absorption coefficient</b> | 4.530 mm <sup>-1</sup>                                                              |                            |
| <b>F(000)</b>                 | 944                                                                                 |                            |

A colorless, plate-like specimen of  $\text{C}_{62}\text{H}_{72}\text{Au}_2\text{B}_2\text{Cl}_{12}\text{F}_8\text{N}_8$ , approximate dimensions 0.050 mm x 0.120 mm x 0.240 mm, was used for the X-ray crystallographic analysis. The X-ray intensity data were measured on a D8 QUEST ECO three-circle diffractometer system equipped with a Ceramic x-ray tube (Mo  $K\alpha$ ,  $\lambda = 0.71073$  Å) and a doubly curved silicon crystal Bruker Triumph monochromator. A total of 647 frames were collected. The total exposure time was 0.54 hours. The frames were integrated with the Bruker SAINT software package using a narrow-frame algorithm. The integration of the data using a triclinic unit cell yielded a total of 81153 reflections to a maximum  $\theta$  angle of  $28.38^\circ$  (0.75 Å resolution),



of which 9086 were independent (average redundancy 8.932, completeness = 99.6%,  $R_{\text{int}} = 7.20\%$ ,  $R_{\text{sig}} = 4.18\%$ ) and 7751 (85.31%) were greater than  $2\sigma(F^2)$ . The final cell constants of  $a = 10.5400(13) \text{ \AA}$ ,  $b = 13.2869(19) \text{ \AA}$ ,  $c = 13.5269(18) \text{ \AA}$ ,  $\alpha = 87.440(4)^\circ$ ,  $\beta = 88.406(4)^\circ$ ,  $\gamma = 74.202(4)^\circ$ , volume =  $1820.7(4) \text{ \AA}^3$ , are based upon the refinement of the XYZ-centroids of 9765 reflections above  $20 \sigma(I)$  with  $5.225^\circ < 2\theta < 56.34^\circ$ . Data were corrected for absorption effects using the Multi-Scan method (SADABS). The ratio of minimum to maximum apparent transmission was 0.699. The calculated minimum and maximum transmission coefficients (based on crystal size) are 0.4090 and 0.8050. The structure was solved and refined using the Bruker SHELXTL Software Package, using the space group  $P -1$ , with  $Z = 1$  for the formula unit,  $\text{C}_{62}\text{H}_{72}\text{Au}_2\text{B}_2\text{Cl}_{12}\text{F}_8\text{N}_8$ . The final anisotropic full-matrix least-squares refinement on  $F^2$  with 442 variables converged at  $R1 = 4.17\%$ , for the observed data and  $wR2 = 10.25\%$  for all data. The goodness-of-fit was 1.059. The largest peak in the final difference electron density synthesis was  $2.072 \text{ e}^-/\text{\AA}^3$  and the largest hole was  $-2.660 \text{ e}^-/\text{\AA}^3$  with an RMS deviation of  $0.171 \text{ e}^-/\text{\AA}^3$ . On the basis of the final model, the calculated density was  $1.753 \text{ g/cm}^3$  and  $F(000)$ , 944  $\text{e}^-$ .

## 9 Effective Fragment Orbitals (EFOs) of the pincer ligands

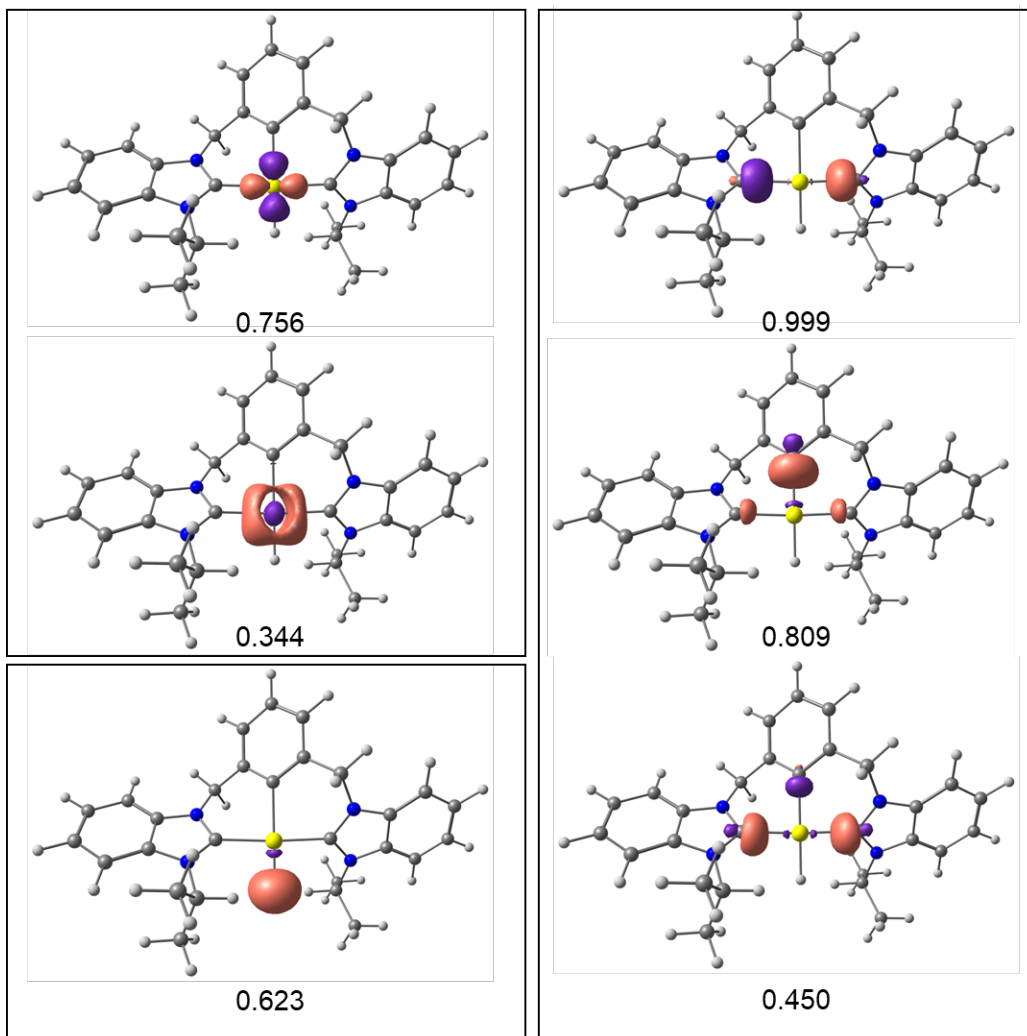

Figure S116. Most relevant EFOs and (spin) occupations of Au, H and pincer ligand for **12a**. Isocontour set to 0.1.

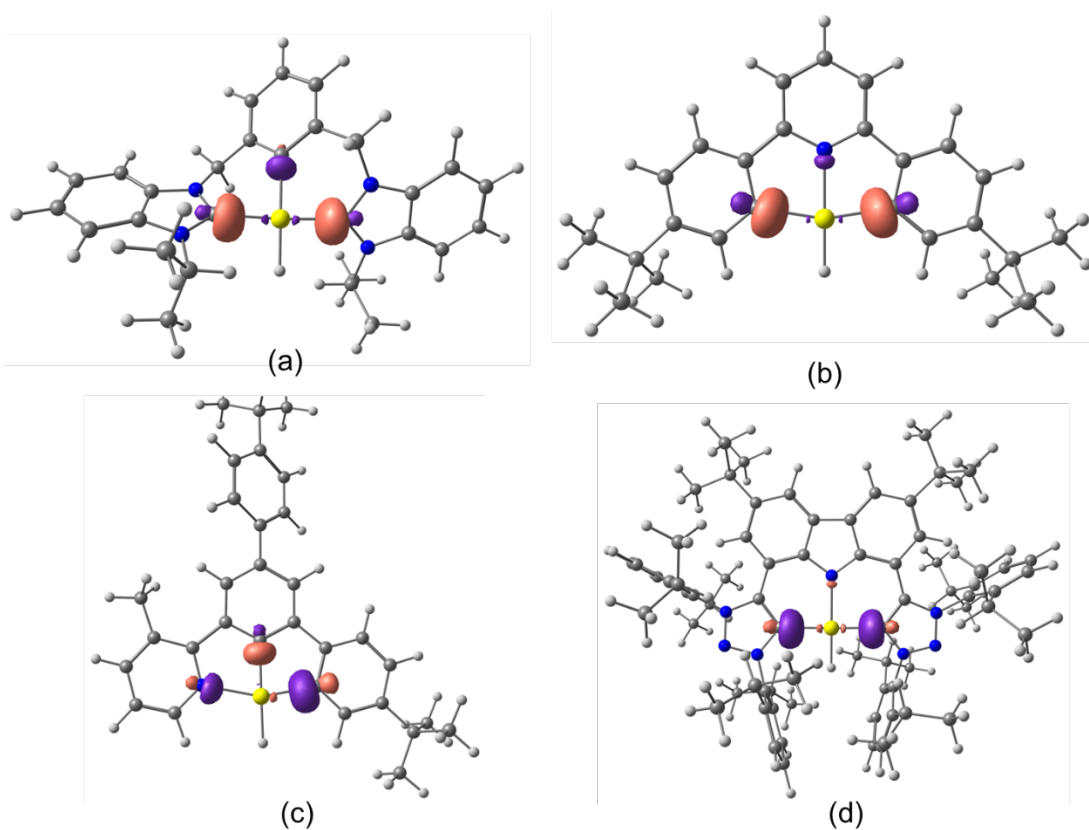

Figure S117. EFO describing the sigma donation from the pincer ligand to the Au atom in a) **12a**, as well as in the pincer Au(III)–H complexes described by b) Bochmann, c) Nevado, and d) Bezuidenhout.. Isocontour set to 0.1.

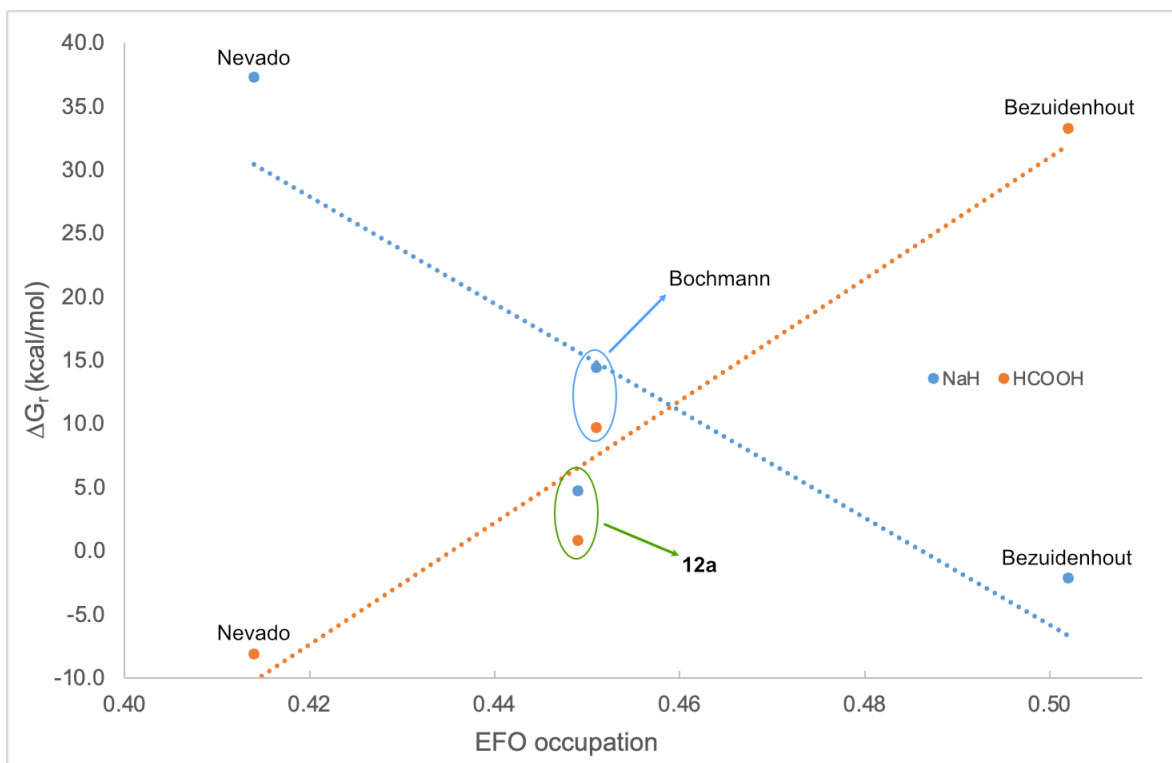

Figure S118. Graph of  $\Delta G_r$  vs EFO occupation (see Table 1 of the main text).

## 10 References

- (1) Starikova, O. V.; Dolgushin, G. V.; Larina, L. I.; Ushakov, P. E.; Komarova, T. N.; Lopyrev, V. A. Synthesis of 1,3-Dialkylimidazolium and 1,3-Dialkylbenzimidazolium Salts. *Russ. J. Org. Chem.* **2003**, *39* (10), 1467-1470.
- (2) Liu, Q.-X.; Yin, L.-N.; Feng, J.-C. New N-heterocyclic carbene silver(I) and mercury(II) 2-D supramolecular layers by the  $\pi$ - $\pi$  stacking interactions. *J. Organomet. Chem.* **2007**, *692* (17), 3655-3663.
- (3) Frisch, M. J.; Trucks, G. W.; Schlegel, H. B.; Scuseria, G. E.; Robb, M. A.; Cheeseman, J. R.; Scalmani, G.; Barone, V.; Petersson, G. A.; Nakatsuji, H.; Li, X.; Caricato, M.; Marenich, A. V.; Bloino, J.; Janesko, B. G.; Gomperts, R.; Mennucci, B.; Hratchian, H. P.; Ortiz, J. V.; Izmaylov, A. F.; Sonnenberg, J. L.; Williams, D.; Ding, F.; Lipparini, F.; Egidi, F.; Goings, J.; Peng, B.; Petrone, A.; Henderson, T.; Ranasinghe, D.; Zakrzewski, V. G.; Gao, J.; Rega, N.; Zheng, G.; Liang, W.; Hada, M.; Ehara, M.; Toyota, K.; Fukuda, R.; Hasegawa, J.; Ishida, M.; Nakajima, T.; Honda, Y.; Kitao, O.; Nakai, H.; Vreven, T.; Throssell, K.; Montgomery Jr., J. A.; Peralta, J. E.; Ogliaro, F.; Bearpark, M. J.; Heyd, J. J.; Brothers, E. N.; Kudin, K. N.; Staroverov, V. N.; Keith, T. A.; Kobayashi, R.; Normand, J.; Raghavachari, K.; Rendell, A. P.; Burant, J. C.; Iyengar, S. S.; Tomasi, J.; Cossi, M.; Millam, J. M.; Klene, M.; Adamo, C.; Cammi, R.; Ochterski, J. W.; Martin, R. L.; Morokuma, K.; Farkas, O.; Foresman, J. B.; Fox, D. J. *Gaussian 16, Rev. A.03*, Gaussian Inc.: Wallingford, CT, 2016.
- (4) Adamo, C.; Barone, V. Toward reliable density functional methods without adjustable parameters: The PBE0 model. *J. Chem. Phys.* **1999**, *110* (13), 6158-6170.
- (5) Grimme, S.; Antony, J.; Ehrlich, S.; Krieg, H. A consistent and accurate ab initio parametrization of density functional dispersion correction (DFT-D) for the 94 elements H-Pu. *J. Chem. Phys.* **2010**, *132* (15), 154104.
- (6) Becke, A. D.; Johnson, E. R. A density-functional model of the dispersion interaction. *J. Chem. Phys.* **2005**, *123* (15), 154101.
- (7) Grimme, S.; Ehrlich, S.; Goerigk, L. Effect of the damping function in dispersion corrected density functional theory. *J. Comput. Chem.* **2011**, *32* (7), 1456-1465.
- (8) Hylland, K. T.; Schmidtke, I. L.; Wragg, D. S.; Nova, A.; Tilset, M. Synthesis of substituted (N,C) and (N,C,C) Au(III) complexes: the influence of sterics and electronics on cyclometalation reactions. *Dalton Trans.* **2022**, *51* (13), 5082-5097.
- (9) Langseth, E.; Scheuermann, M. L.; Balcells, D.; Kaminsky, W.; Goldberg, K. I.; Eisenstein, O.; Heyn, R. H.; Tilset, M. Generation and Structural Characterization of a Gold(III) Alkene Complex. *Angew. Chem. Int. Ed.* **2013**, *52* (6), 1660-1663.
- (10) Holmsen, M. S. M.; Nova, A.; Balcells, D.; Langseth, E.; Øien-Ødegaard, S.; Heyn, R. H.; Tilset, M.; Laurency, G. trans-Mutation at Gold(III): A Mechanistic Study of a Catalytic Acetylene Functionalization via a Double Insertion Pathway. *ACS Catalysis* **2017**, *7* (8), 5023-5034.
- (11) Figgen, D.; Peterson, K. A.; Dolg, M.; Stoll, H. Energy-consistent pseudopotentials and correlation consistent basis sets for the 5d elements Hf-Pt. *J. Chem. Phys.* **2009**, *130* (16), 164108.
- (12) Figgen, D.; Rauhut, G.; Dolg, M.; Stoll, H. Energy-consistent pseudopotentials for group 11 and 12 atoms: adjustment to multi-configuration Dirac-Hartree-Fock data. *Chem. Phys.* **2005**, *311* (1), 227-244.

- (13) Marenich, A. V.; Cramer, C. J.; Truhlar, D. G. Universal Solvation Model Based on Solute Electron Density and on a Continuum Model of the Solvent Defined by the Bulk Dielectric Constant and Atomic Surface Tensions. *J. Phys. Chem. B* **2009**, *113* (18), 6378-6396.
- (14) Grimme, S. Supramolecular Binding Thermodynamics by Dispersion-Corrected Density Functional Theory. *Chem. Eur. J.* **2012**, *18* (32), 9955-9964.
- (15) Luchini, G.; Alegre-Requena, J. V.; Funes-Ardoiz, I.; Paton, R. S. GoodVibes: automated thermochemistry for heterogeneous computational chemistry data [version 1; peer review: 2 approved with reservations]. *F1000Research* **2020** *9*, 291.
- (16) Reed, A. E.; Weinhold, F. Natural bond orbital analysis of near-Hartree–Fock water dimer. *J. Chem. Phys.* **1983**, *78* (6), 4066-4073.
- (17) P. Salvador, E. R.-C., M. Montilla, L. Pujal, M. Gimferrer. APOST-3D: Chemical Concepts from Wavefunction Analysis. *J. Chem. Phys.* **2024**, *160*, 172502.
